# Supplementary material
Source: PubMed Central journal article supplement (PMC2988535)
Supplement: 100771_1.pdf [file 100771_1.pdf]

Appendix 1 (as supplied by the authors): Background materials for 2010 Clinical Practice Guidelines for the Diagnosis and Management of Osteoporosis in Canada

## APPENDIX 1

### Table of Contents

|                                                                                                  |           |
|--------------------------------------------------------------------------------------------------|-----------|
| <b>DEVELOPMENT OF GUIDELINES AND METHODS</b>                                                     | <b>2</b>  |
| <b>HOW TO ASSESS FOR OSTEOPOROSIS AND FRACTURE RISK</b>                                          |           |
| Recommendations for clinical assessment.....                                                     | 22        |
| Assessment and management of falls.....                                                          | 24        |
| 2010 CAROC zones of fracture risk for women and men using femoral neck<br>T-score.....           | 25        |
| Vertebral fracture recognition and radiologist reporting.....                                    | 26        |
| Potential clinical role for bone turnover markers (BTMs).....                                    | 27        |
| <b>THERAPIES AND ADVERSE EFFECTS</b>                                                             |           |
| First line therapies with evidence for fracture prevention in postmenopausal<br>women.....       | 28        |
| <b>ADDITIONAL RISK FACTORS IN MODERATE RISK PATIENTS</b>                                         |           |
| Factors that warrant consideration for pharmacological therapy in moderate risk<br>patients..... | 29        |
| <b>ENDORSEMENTS</b>                                                                              | <b>30</b> |
| <b>EVIDENCE TABLES</b>                                                                           |           |
| Evidence for risk prediction models tested in Canada.....                                        | 31        |
| Evidence for risk prediction models tested in countries outside Canada.....                      | 33        |
| Evidence of randomized controlled trials on therapies.....                                       | 40        |
| Evidence of systematic reviews on therapies.....                                                 | 45        |
| Evidence of randomized controlled trials on special populations.....                             | 51        |
| Evidence of randomized controlled trials or observational studies on adverse events.....         | 52        |
| Evidence of systematic reviews on adverse events.....                                            | 59        |
| Evidence of case reports/case studies on adverse events.....                                     | 61        |

## DEVELOPMENT OF GUIDELINES AND METHODS

### Search Strategy

The systematic review of Risk Assessment Models identified and compared existing models for defining fracture risk published from January 1990 to December 2009 and examines the level of evidence that supports the use of these models in Canada. A systematic search was conducted for absolute fracture risk assessment systems or risk prediction models for people over the age of 50 with osteoporosis or low bone density following fracture. The results of the study selection and numbers of articles identified from the systematic review are presented in Figure A1: PRISMA statement flow diagram - models and studies of absolute fracture risk assessment. The abstracts were screened by two authors independently (WDL and AP), who applied inclusion and exclusion criteria and selected citations to be appraised in full text. The study inclusion/exclusion criteria are listed in Table A1. Full text papers were appraised in detail and two researchers performed data abstraction independently using a pre-determined form. Inconsistencies or disagreements in the appraisal and data abstraction were decided by consensus of the working group and in consultation with the Chair of the working group (WDL).

The systematic review of pharmacological therapies focused on the treatment of individuals over the age of 50 years at increased risk for fracture and to report on adverse events associated with these therapies as published from January 2007 to December 11, 2009. We applied the search strategy developed by MacLean and colleagues in a systematic review of treatments to prevent fractures(1). Meta-analyses published in the last five years for exercise, falls prevention and hip protectors were reviewed however a systematic literature search and abstraction for these topics was beyond the scope of this review.

We elected to expand our search strategy to include case series for recently reported adverse events in addition to those included in the MacLean systematic review from randomized controlled trials (Table A2). This approach allowed inclusion of reported postmarketing of adverse events. A bibliography of possible references and abstracts was generated and the abstracts were screened by two researchers independently. Each researcher applied pre-determined inclusion and exclusion criteria and then selected which citations were to be appraised in full text. The study inclusion/exclusion criteria are listed in Table A3. The results of the study selection and numbers of articles identified from the systematic review are presented in Figure A2: PRISMA statement flow diagram: therapies. Full text papers were appraised in detail and two researchers performed data abstraction independently using a standardized abstraction form, with separate forms for therapies and for adverse events. Inconsistencies or disagreements in the study selection and data abstraction were resolved through consensus and in consultation with the Chair of the working group (AP).

### Methods for Developing Recommendations

Each included study was assigned a level of evidence using criteria consistent with those used in previous osteoporosis guidelines (Table A4) (2)(3). Similarly, each clinical practice recommendation was graded using the same system used in previous osteoporosis guidelines by the working groups.

### Stakeholder Consultation

This expert panel met over two days in November 2009. This expert panel consisted of experts in the field and participants from stakeholder organizations (Table A5). The group used the RAND/UCLA method of developing consensus on the appropriateness of the guidelines(4) to ensure clinical relevance and applicability. The RAND/UCLA Appropriateness Method was developed in the 1980s. The rationale behind the method is that randomized clinical trials and other research are generally either not available or cannot provide evidence at a level of detail needed for use by clinicians in everyday practice. Although robust scientific evidence about the benefits of many procedures is lacking, physicians must nonetheless make decisions every day about when to use them (5). The RAND/UCLA method was developed to combine the best available evidence with the collective judgment of experts to yield a statement regarding the appropriateness of performing a procedure or screening test. Revisions to the guidelines were made based on the feedback provided by the panel; revised recommendations were endorsed by the panel using an electronic voting system.

For more details about the database searches, refer to Table A6.

### REFERENCES

- (1) MacLean C, Newberry S, Maglione M, McMahon M, Ranganath V, Suttorp M et al. Systematic review: comparative effectiveness of treatments to prevent fractures in men and women with low bone density or osteoporosis. *Ann Intern Med* 2008; 148(3):197-213.
- (2) Brown JP, Josse RG. 2002 clinical practice guidelines for the diagnosis and management of osteoporosis in Canada. *CMAJ* 2002; 167(10 Suppl):S1-34.
- (3) Meltzer S, Leiter L, Daneman D, Gerstein HC, Lau D, Ludwig S et al. 1998 clinical practice guidelines for the management of diabetes in Canada. *Canadian Medical Association Journal* 1998; 159(8):S1-S29.
- (4) Brook RH, Chassin MR, Fink A. A method for the detailed assessment of the appropriateness of medical technologies. *International Journal of Technology Assessment in Health Care* 1986; 2:53-63.
- (5) Fitch, S.J. Bernstein and M.D. Aguilar et al., *The RAND/UCLA Appropriateness Method User's Manual: MR-1269-DG-XII/RE*, RAND, Santa Monica, Calif (2001).

**Figure A1: PRISMA statement flow diagram - models and studies of absolute fracture risk assessment - 1990-January 2009**

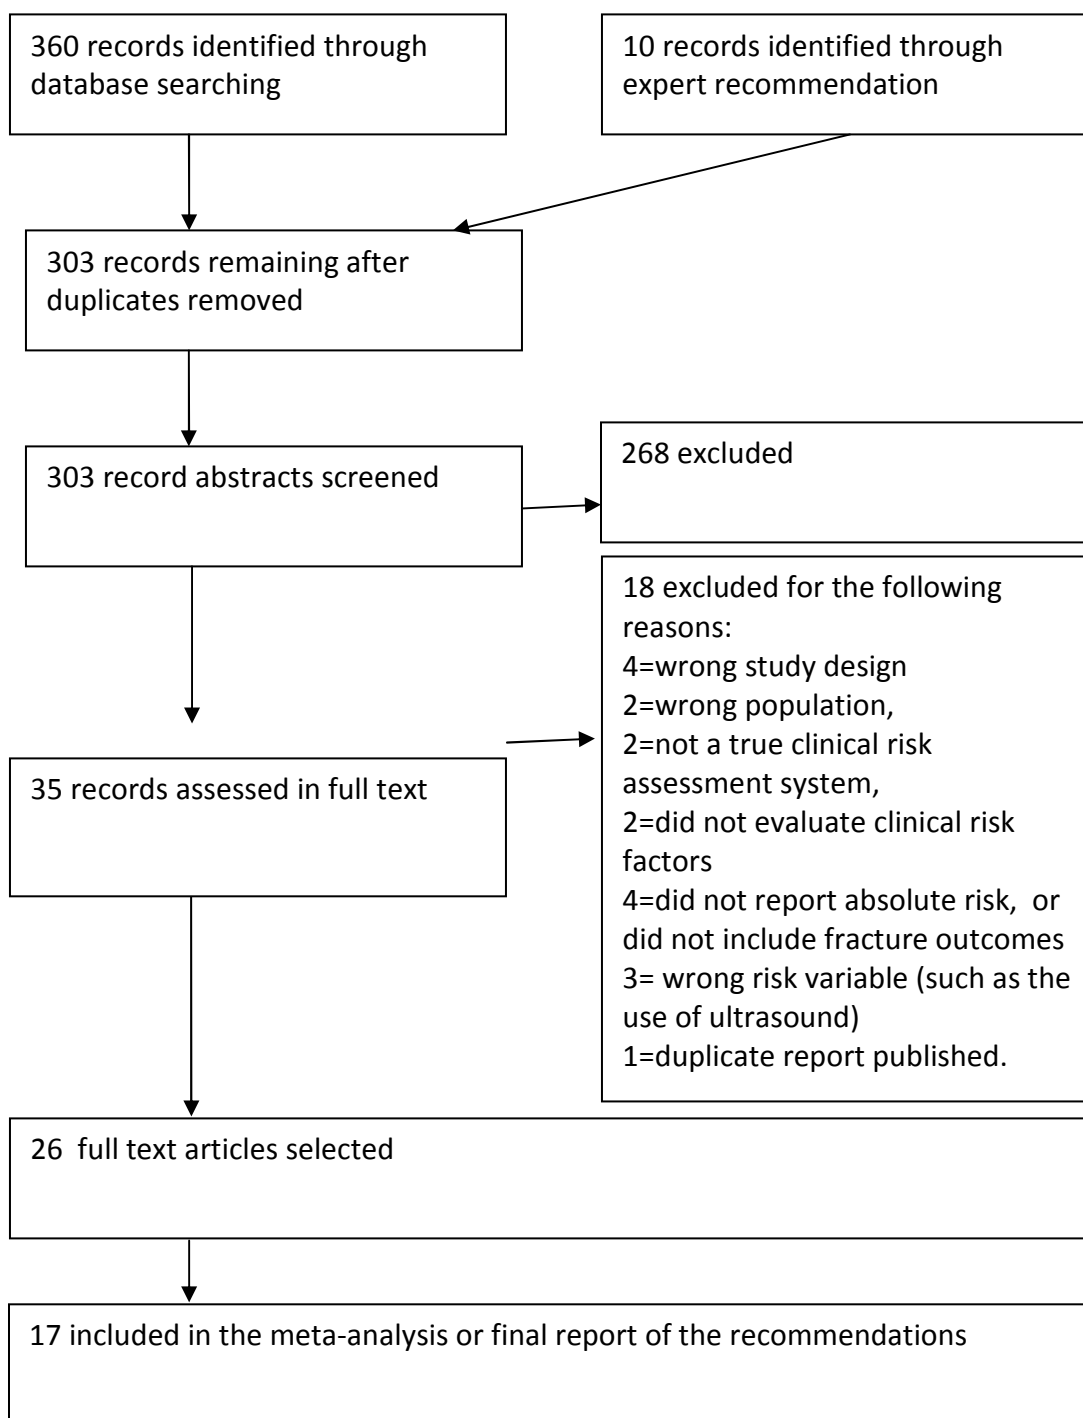

**Figure A2: PRISMA statement flow diagram: therapies  
Studies about benefits and adverse events of  
pharmacological therapies for people aged 50 and older  
with osteoporosis January 2007-December 11, 2009:**

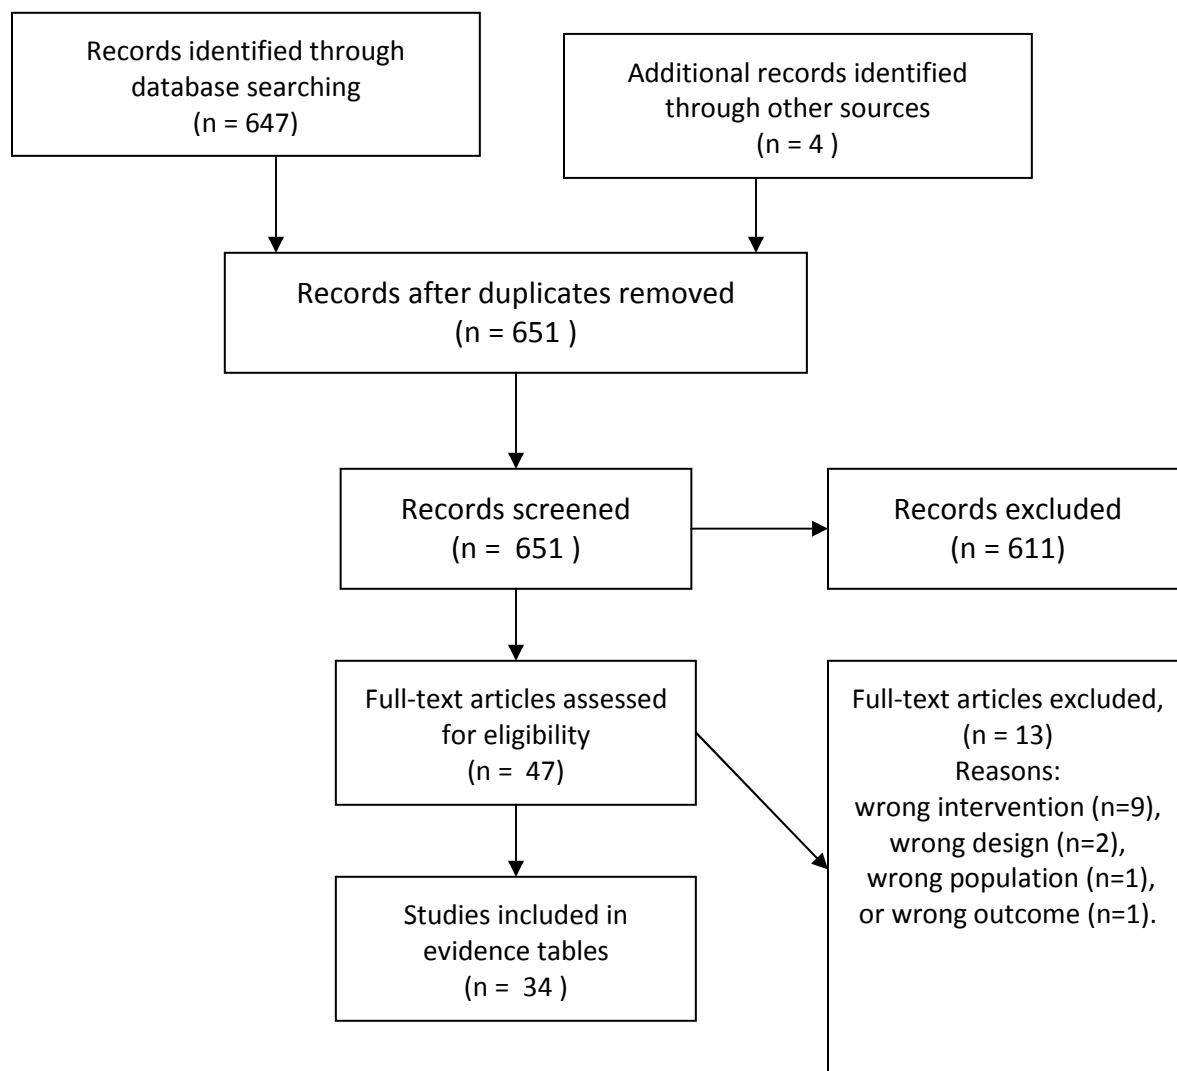

**Table A1: Risk assessment– study inclusion/exclusion criteria**

|           |                                                                                                                                                                                                                                                                                                                                                                                                                                                                                 |
|-----------|---------------------------------------------------------------------------------------------------------------------------------------------------------------------------------------------------------------------------------------------------------------------------------------------------------------------------------------------------------------------------------------------------------------------------------------------------------------------------------|
| Inclusion | <p>Population: men or women age &gt;50 years</p> <p>Intervention: absolute fracture risk assessment systems or risk prediction models</p> <p>Comparison: not applicable</p> <p>Outcomes: fractures, fracture prevention</p> <p>Time: January 1990-December 14, 2009</p> <p>Design: prospective and retrospective cohorts, RCTs (inactive control arm), meta-analysis, and systematic reviews</p> <p>Language: English</p>                                                       |
| Exclusion | <p>Outcomes other than fracture risk</p> <p>Non clinical variables or risk factors such as ultrasound</p> <p>Papers that do not describe a model or system</p> <p>Duplicates of papers published in different journals or sources. Selection of which citation to use was based on the availability of the full text and the preference of the authors.</p> <p>Excluded study designs: RCTs (active arm), case series, case reports, letters, editorials, narrative reviews</p> |

**Table A2: Therapies - study inclusion/ exclusion criteria**

|           |                                                                                                                                                                                                                                                                                                                                                                                                                                                                                                                        |
|-----------|------------------------------------------------------------------------------------------------------------------------------------------------------------------------------------------------------------------------------------------------------------------------------------------------------------------------------------------------------------------------------------------------------------------------------------------------------------------------------------------------------------------------|
| Inclusion | <p>Population: men or women age &gt;50 years</p> <p>Intervention: pharmacological therapies for osteoporosis including Bisphosphonates, Calcitonin, Estrogen, PTH, Raloxifene, Vitamin D</p> <p>Design: RCTs, meta-analysis, and systematic reviews</p> <p>Comparison: placebo, within class, and/or between class comparisons</p> <p>Outcomes: Fracture prevention: Number/% individuals with at least one vertebral/non-vertebral fracture.</p> <p>Time: January 2007-December 11, 2009</p> <p>Language: English</p> |
| Exclusion | <p>Therapies other than those listed in the inclusion criteria</p> <p>Therapies not available in Canada</p> <p>Outcomes other than fracture risk</p> <p>Duplicates of papers published in different journals or sources. Selection of which citation to use was based on the availability of the full text and the preference of the authors.</p> <p>Excluded study designs: editorials, narrative reviews</p>                                                                                                         |

**Table A3: Adverse Events - study inclusion/ exclusion criteria**

|           |                                                                                                                                                                                                                                                                                                                                                                                                                                                                                                                                                                                                                                                                                                                                                                                                                                                                                                                         |
|-----------|-------------------------------------------------------------------------------------------------------------------------------------------------------------------------------------------------------------------------------------------------------------------------------------------------------------------------------------------------------------------------------------------------------------------------------------------------------------------------------------------------------------------------------------------------------------------------------------------------------------------------------------------------------------------------------------------------------------------------------------------------------------------------------------------------------------------------------------------------------------------------------------------------------------------------|
| Inclusion | <p>Population: Men and /or women &gt; 50 years</p> <p>Intervention: pharmacologic therapies for osteoporosis such as Bisphosphonates (alendronate, risedronate, etidronate zoledronic acid), Calcitonin, Estrogen, PTH, Raloxifene, Calcium, Vitamin D</p> <p>Comparison: placebo, within class, and/or between class comparisons</p> <p>Outcomes: harm of interest such as cardiovascular, digestive, malignancy, infection, osteonecrosis of the jaw musculoskeletal, death, hospitalization, and other adverse events including, renal failure, hypocalcemia, hypercalcemia, hypercalciuria, nephrolithiasis, breast abnormality gynecological problems and ear, nose, and throat problems.</p> <p>Design: randomized placebo controlled trial, controlled clinical trial, prospective cohort, with control group, prospective cohort, no control group, retrospective cohort, case study, case series, letters.</p> |
| Exclusion | <p>Therapies other than those listed in the inclusion criteria</p> <p>Therapies not available in Canada</p> <p>Duplicates of papers published in different journals or sources. Selection of which citation to use was based on the availability of the full text and the preference of the authors.</p> <p>Excluded study designs: editorials, commentaries, narrative reviews</p>                                                                                                                                                                                                                                                                                                                                                                                                                                                                                                                                     |



**Table A4: Criteria used to assign a level of evidence to articles**

| Level                                                            | Criteria                                                                                                                                                                                                                                                                                                                  |
|------------------------------------------------------------------|---------------------------------------------------------------------------------------------------------------------------------------------------------------------------------------------------------------------------------------------------------------------------------------------------------------------------|
| <b>Studies of diagnosis</b>                                      |                                                                                                                                                                                                                                                                                                                           |
| 1                                                                | i. Independent interpretation of test results<br>ii. Independent interpretation of the diagnostic standard<br>iii. Selection of people suspected, but not known to have the disorder<br>iv. Reproducible description of the test and diagnostic standard<br>v. At least 50 people with and 50 people without the disorder |
| 2                                                                | Meets 4 of the Level 1 criteria                                                                                                                                                                                                                                                                                           |
| 3                                                                | Meets 2 of the Level 1 criteria                                                                                                                                                                                                                                                                                           |
| 4                                                                | Meets 1 or 2 of the Level 1 criteria                                                                                                                                                                                                                                                                                      |
| <b>Studies of treatment and intervention</b>                     |                                                                                                                                                                                                                                                                                                                           |
| 1+                                                               | Systematic overview of meta-analysis of randomized controlled trials                                                                                                                                                                                                                                                      |
| 1                                                                | 1 randomized controlled trial with adequate power                                                                                                                                                                                                                                                                         |
| 2+                                                               | Systematic overview or meta-analysis of Level 2 randomized controlled trials                                                                                                                                                                                                                                              |
| 2                                                                | Randomized controlled trial that does not meet Level 1 criteria                                                                                                                                                                                                                                                           |
| 3                                                                | Non-randomized controlled trial or cohort study                                                                                                                                                                                                                                                                           |
| 4                                                                | Before-after study, cohort study with non-contemporaneous controls, case-control study                                                                                                                                                                                                                                    |
| 5                                                                | Case series without controls                                                                                                                                                                                                                                                                                              |
| 6                                                                | Case report or case series of < 10 patients                                                                                                                                                                                                                                                                               |
| <b>Studies of prognosis</b>                                      |                                                                                                                                                                                                                                                                                                                           |
| 1                                                                | i. Inception cohort of patients with the condition of interest, but free of the outcome of interest<br>ii. Reproducible inclusion and exclusion criteria<br>iii. Follow-up of at least 80% of participants<br>iv. Statistical adjustment for confounders<br>v. Reproducible description of the outcome measures           |
| 2                                                                | Meets criterion i and 3 of the 4 of the Level 1 criteria                                                                                                                                                                                                                                                                  |
| 3                                                                | Meets criterion i and 2 of the 4 of the Level 1 criteria                                                                                                                                                                                                                                                                  |
| 4                                                                | Meets criterion i and 1 of the 4 of the Level 1 criteria                                                                                                                                                                                                                                                                  |
| <b>Grades of recommendation for clinical practice guidelines</b> |                                                                                                                                                                                                                                                                                                                           |
| Grade                                                            | Criteria                                                                                                                                                                                                                                                                                                                  |
| A                                                                | Need supportive level 1 or 1+ evidence plus consensus*                                                                                                                                                                                                                                                                    |
| B                                                                | Need supportive level 2 or 2+ evidence plus consensus*                                                                                                                                                                                                                                                                    |
| C                                                                | Need supportive level 3 evidence plus consensus                                                                                                                                                                                                                                                                           |
| D                                                                | Any lower level of evidence supported by consensus                                                                                                                                                                                                                                                                        |

\*As appropriate level of evidence was necessary, but not sufficient to assign a grade in recommendation; consensus was required in addition.

Brown JP, Josse RG. 2002 clinical practice guidelines for the diagnosis and management of osteoporosis in Canada. *CMAJ* 2002; 167(10 Suppl):S1-34.

## Table A5: Members of the Expert Panel, held in Toronto in November 2009

**Brian Lentle, MB, MD, FRCPC, FRCR, FACP**  
(Moderator)  
Professor Emeritus of Radiology  
University of British Columbia  
Past President, Canadian Association of Radiologists

**Jacques Levesque, MD, FRCP**  
Vice President, Canadian Association of Radiologists  
Chair, Bone Mineral Density Accreditation Working Group  
Quebec City

**Sumit R Majumdar, MD, MPH, FRCPC, FACP**  
Associate Professor, Dept of Medicine  
University of Alberta

**Heather Frame, MD, BScMed, CCFP**  
Family Physician  
Winnipeg

**Lynn Nash, MD, CCFP, FCFP**  
Family Physician  
Associate Clinical Professor, Department of Family Medicine, McMaster University  
Past-President of the Ontario College of Family Physicians  
Chair of the OCFP Osteoporosis Initiative

**Michel Fortier, MD, FRCP**  
Clinical Associate Professor, Dept of Obstetrics and Gynecology  
Laval University, Quebec City  
President, SOGC

**Earl Bogoch, MD, MSc, FRCSC**  
Medical Director, Mobility Program  
St Michael's Hospital  
Professor, Dept of Surgery  
University of Toronto

**David Goltzman, MD, FRCPC**  
Professor of Medicine and Physiology, McGill University  
Director, McGill Centre for Bone & Mineral Research  
Director, Canadian Multicentre Osteoporosis Study (CaMos)

**Robert Josse, MSc, MB, BS, FRCPC**  
Medical Director  
Osteoporosis Centre, Division of Endocrinology & Metabolism  
St Michael's Hospital  
Professor of Medicine  
University of Toronto

**Colleen Metge, BSc (Pharm), PhD**  
Associate Professor, Faculty of Pharmacy  
University of Manitoba

**Louis-Georges Ste Marie, MD, CSPQ**  
Director of Metabolic Bone Diseases  
Associate Professor of Medicine  
Dept of Medicine, University of Montreal

**Diane Theriault, MD, FRCPC**  
Rheumatologist  
Dartmouth General Hospital

**Anne Marie Whelan, Pharm D**  
Associate Professor  
College of Pharmacy, Dalhousie University

## Table A6: Search Strategies

### Risk Assessment Search

Database: Ovid MEDLINE(R) <1990 to November Week 3 2009>

#### Search Strategy:

```

1      exp "Predictive Value of Tests"/ (90230)
2      *Probability/ (2917)
3      *Logistic Models/ (1013)
4      *Models, Statistical/ (12307)
5      *Decision Support Techniques/ (3991)
6      *Computer Simulation/ (17961)
7      absolute adj3 risk ad3 prediction.tw(22)
8      Risk Assessment/mt (11087)
9      *Fractures, Bone/ (27103)
10     Osteoporosis/co [Complications] (4673)
11     *Osteoporosis, Postmenopausal/co [Complications] (437)
12     exp Prospective Studies/ (257450)
13     exp Evaluation Studies/ (113946)
14     meta-analysis.pt,sh. (20287)
15     (meta-anal: or metaanal:).tw. (28169)
16     (quantitativ: review: or quantitativ: overview:).tw. (468)
17     (methodologic: review: or methodologic: overview:).tw.
(224)
18     (primary adj3 care adj3 physician).tw. (3553)
19     review.pt. and medline.tw. (21103)
20     or/14-19 (56112)
21     "randomized controlled trial".pt. (270077)
22     ("clinical trial" or "controlled clinical trial").pt.
(468665)
23     (random$ or placebo$).ti,ab,sh. (673964)
24     ((singl$ or double$ or triple$ or treble$) and (blind$ or
mask$)).tw,sh. (118554)
25     24 or 22 or 23 or 21 (899205)
26     13 or 12 (365325)
27     11 or 10 or 9 (31313)
28     6 or 3 or 7 or 2 or 8 or 1 or 4 or 5 (136954)
29     27 and 28 (407)
30     25 and 29 (45)
31     29 and 20 (13)
32     limit 31 to (english language and yr="1990 - 2009") (11)
33     limit 32 to (english language and yr="1990 - 2009") (11)
34     13 or 12 (365325)
35     34 and 29 (97)
36     limit 35 to (english language and yr="1990 - 2009") (94)
37     from 36 keep 1-94 (94)
38     from 33 keep 1-11 (11)

```

Appendix to: Papaioannou A, Morin S, Cheung AM, et al; for the Scientific Advisory Council of Osteoporosis Canada. 2010 clinical practice guidelines for the diagnosis and management of osteoporosis in Canada: summary. *CMAJ* 2010. DOI 10.1503/cmaj.100771. Copyright © 2010 Canadian Medical Association or its licensors

39 from 30 keep 1-45 (45)

**Database: EMBASE**

1 \*Probability/ (885)  
 2 Logistic Models.mp. or exp Statistical Model/ (20495)  
 3 exp Decision Support System/ (1528)  
 4 \*Computer Simulation/ (2388)  
 5 \*Algorithm/ (3089)  
 6 exp Nomogram/ (1365)  
 7 \*Risk Assessment/ (11547)  
 8 (risk adj5 assessment adj5 tool).mp. [mp=title, abstract,  
 subject headings, heading word, drug trade name, original title,  
 device manufacturer, drug manufacturer name] (515)  
 9 computer model.tw. (2369)  
 10 absolute risk.tw. (1826)  
 11 absolute risk prediction.tw. (8)  
 12 risk of hip fracture.tw. (537)  
 13 bone mineral density reporting.mp. (4)  
 14 prognostic nomograms.tw. (13)  
 15 fracture probability.tw. (35)  
 16 assessment of fracture probability.mp. (1)  
 17 \*Prediction/ (1489)  
 18 \*Computer Prediction/ (115)  
 19 \*"Prediction and Forecasting"/ (38)  
 20 or/1-19 (47174)  
 21 \*Fracture/ (7044)  
 22 \*Hip Fracture/ (3998)  
 23 \*Vertebra Fracture/ (2069)  
 24 22 or 21 or 23 (12941)  
 25 24 and 20 (596)  
 26 exp meta analysis/ (34535)  
 27 meta?analys\$.tw,sh. (35072)  
 28 (systematic\$ adj5 review\$).tw,sh. (27098)  
 29 (systematic\$ adj5 overview\$).tw,sh. (425)  
 30 (methodologic\$ adj5 review\$).tw,sh. (1532)  
 31 (methodologic\$ adj5 overview\$).tw,sh. (119)  
 32 ((integrative adj5 research adj5 review\$) or (research  
 adj5 integrat\$)).tw. (2018)  
 33 (quantitativ\$ adj5 synthesi\$).tw,sh. (1660)  
 34 ((pooled or pooling) and analys\$).tw,sh. (10896)  
 35 or/26-34 (65411)  
 36 exp randomized controlled trial/ (164648)  
 37 (random\$ or placebo\$.ti,ab,sh. (523013)  
 38 ((double or single or triple or treble) and (blind\$ or  
 mask\$)).mp. [mp=title, abstract, subject headings, heading word,  
 drug trade name, original title, device manufacturer, drug  
 manufacturer name] (122930)  
 39 controlled clinical trial\$.tw,sh. (64752)  
 40 RCT.tw. (2618)  
 41 or/36-40 (553032)  
 42 35 and 25 (27)

```

43     limit 42 to (english language and yr="1990 - 2009") (27)
44     from 43 keep 1-27 (27)
45     25 and 41 (105)
46     limit 45 to (english language and yr="1990 - 2009") (101)
47     from 46 keep 1-101 (101)

```

**Database: EBM Reviews (includes Cochrane Database of Systematic Reviews, Database of reviews of Effectiveness (DARE), Controlled Trials Register (CENTRAL), ACP Journal Club, HTA, and NHSEED)**

```

1     Predictive Value of Tests.mp. (3777)
2     risk assessment.mp. (4680)
3     computer model$.mp. (71)
4     Decision Support.mp. (1468)
5     Logistic Models.mp. (2587)
6     (risk adj3 prediction).mp. (130)
7     (absolute adj3 risk adj3 prediction).mp. (2)
8     probability.ti,ab. (3241)
9     or/1-8 (15091)
10    fracture.mp. (3816)
11    hip fracture.mp. (760)
12    11 or 10 (3816)
13    9 and 12 (213)
14    limit 13 to "middle aged (45 plus years)" [Limit not valid
in CDSR,ACP Journal Club,DARE,CCTR,CLCMR; records were retained]
(201)
15    limit 14 to yr="1990 - 2009" [Limit not valid in DARE;
records were retained] (200)
16    from 15 keep 10,13,19-22,25,27,29,40,47-48,51-
52,59,63,79,89,93,101,110-
111,114,121,134,136,138,145,152,154,163,178,193 (33)

```

## Therapies Search

**Note:** The filter for therapies is adapted from the McMaster filter: Haynes RB, Wilczynski N, McKibbin KA, Walker CJ, and Sinclair JC. Developing optimal search strategies for detecting clinically sound studies in MEDLINE. *Journal of the American Medical Informatics Association* 1994;1(6):447-58. and from Dickersin K, Scherer R, Lefebvre C. Identifying relevant studies for systematic reviews. *BMJ* 1994;309(6964):1286-91.

Search terms for therapies were modified for use in OVID Medline from PubMed Searches found in Appendix A of

<http://effectivehealthcare.ahrq.gov/repFiles/LowBoneDensityAppendices.pdf>

**Database: Ovid MEDLINE(R) <2005 to November Week 3 2009>**

**Filter for Systematic reviews:**

```

1      meta-analysis.pt,sh. (10107)
2      (meta-anal$ or metaanal$).tw. (11332)
3      (quantitative$ review$ or quantitative$ overview$).tw.
(135)
4      (methodologic$ review$ or methodologic$ overview$).tw. (51)
5      review.pt. and medline.tw. (10650)
6      or/1-5 (23468)

```

**Strategy for condition:**

```

8      osteoporosis, postmenopausal/ (2426)
9      osteoporosis/ (6922)
10     *Bone Density/ (4472)
11     *Bone Resorption/ (1139)
12     "Bone and Bones"/de, me (3462)
13     (bone adj2 densit$).tw. (7933)
14     or/8-13 (17258)

```

**Filter for RCT:**

```

15     "randomized controlled trial".pt. (70773)
16     ("clinical trial" or "controlled clinical trial").pt.
(74147)
17     (random$ or placebo$).ti,ab,sh. (176484)
18     ((singl$ or double$ or triple$ or treble$) and (blind$ or
mask$)).tw,sh. (24812)
19     or/15-18 (224649)

```

**Strategy for interventions (from MacLean 2008, Appendix A – Note “mp.” is a group field indicator in OVID. The fields searched are: title, original title, abstract, name of substance word, MESH heading**

```

20     (bisphosphonate* or alendronate* or etidronate* or
ibandronate* or pamidronate* or risedronate*).mp. (9224)

```

Appendix to: Papaioannou A, Morin S, Cheung AM, et al; for the Scientific Advisory Council of Osteoporosis Canada. 2010 clinical practice guidelines for the diagnosis and management of osteoporosis in Canada: summary. *CMAJ* 2010. DOI 10.1503/cmaj.100771. Copyright © 2010 Canadian Medical Association or its licensors

21 (zolendronate or calcitonin or miacalcin or calcimar or cibacalcin or calcium or estrogen or estrogen\$ or oestrogen or estradiol or raloxifene or teriparatide).mp. (580864)  
 22 (denosumab or strontium).mp. (9373)  
 23 (testosterone or vitamin d or glucocorticoid\$).mp. (102763)  
 24 or/20-23 (653298)

#### Combined condition and therapies

25 24 and 14 (29849)

#### RCT results

26 25 and 19 (5125)

#### Limits applied:

27 limit 26 to (english language and yr="2007 - 2008" and "middle aged (45 plus years)") (365)

#### Systematic review results

28 25 and 7 (375)

#### Limits applied:

29 limit 28 to (english language and yr="2007 - 2008" and "middle aged (45 plus years)") (27)

#### TOTAL RCTs

29 from 26 keep 1-291 (291)

#### TOTAL SRs

30 from 28 keep 1-23 (23)

#### Database: EMBASE <1980 to 2008 Week 43>

#### Search Strategy:

##### Filter for systematic reviews:

1 exp meta analysis/ (34177)  
 2 meta?analys\$.tw,sh. (34701)  
 3 (systematic\$ adj5 review\$).tw,sh. (26116)  
 4 (systematic\$ adj5 overview\$).tw,sh. (416)  
 5 (methodologic\$ adj5 review\$).tw,sh. (1505)  
 6 (methodologic\$ adj5 overview\$).tw,sh. (118)  
 7 ((integrative adj5 research adj5 review\$) or (research adj5 integrat\$)).tw. (1984)  
 8 (quantitativ\$ adj5 synthesi\$).tw,sh. (1629)  
 9 ((pooled or pooling) and analys\$).tw,sh. (10636)  
 10 or/1-9 (64069)

##### Filter for RCTs:

11 exp randomized controlled trial/ (163740)  
 12 (random\$ or placebo\$).ti,ab,sh. (515765)

13 ((double or single or triple or treble) and (blind\$ or  
 mask\$)).mp. (122444)  
 14 controlled clinical trial\$.tw,sh. (61846)  
 15 RCT.tw. (2540)  
 16 or/11-15 (545307)

#### Strategy for condition:

17 exp OSTEOPOROSIS/ (41808)  
 18 exp FRACTURE/ (80940)  
 19 (fracture adj5 prevent\$).tw. (1038)  
 20 exp Bone Density/ (25179)  
 21 [osteopenia.tw](#), sh. (7473)  
 22 exp Bone Demineralization/ (42807)  
 23 exp Bone Atrophy/ (6951)  
 24 exp Bone Metabolism/ (33551)  
 25 (osteop\$ or fractur\$ or BMD).ti,ab. (120443)  
 26 or/17-25 (179834)

#### Strategy for interventions:

27 \*Bisphosphonic Acid Derivative/ (0)  
 28 bisphosphonate\$.ti,ab. (6112)  
 29 exp ZOLEDRONIC ACID/ (0)  
 30 exp Selective Estrogen Receptor Modulator/ (19847)  
 31 SERM.tw. (605)  
 32 exp RALOXIFENE/ (1744)  
 33 exp CALCITONIN/ (12507)  
 34 exp Parathyroid Hormone/ (21468)  
 35 \*CALCIUM/ (97554)  
 36 \*EXERCISE/ (31051)  
 37 Denosumab.mp. (87)  
 38 Strontium.mp. (9293)  
 39 \*Vitamin D/ (8276)  
 40 or/27-39 (194695)



**Combined condition and therapies**

39 26 and 40 (20265)

**RCT results:**

40 16 and 40 (3755)

**Limits applied:**

41 limit 40 to (english language and yr="2007 - 2009" and (adult &lt;18 to 64 years&gt; or aged &lt;65+ years&gt;)) (223)

**SR results:**

42 39 and 10 (601)

**Limits applied:**

43 limit 42 to (english language and yr="2007 - 2009" and (adult &lt;18 to 64 years&gt; or aged &lt;65+ years&gt;)) (3)

**TOTAL Embase SRs**

44 from 43 keep 1-3 (3)

**TOTAL Embase RCTs**

45 from 41 keep 1-223 (223)

**Database: EBM Reviews - includes Cochrane Database of Systematic Reviews, Database of reviews of Effectiveness (DARE), Controlled Trials Register (CENTRAL), ACP Journal Club, Cochrane Methods Register, Health Technology Assessment, and NHS Economic Evaluation Database.**

**Condition:**

1 (osteoporosis or osteopenia or osteopaenia or fracture\$ or bone mineral).mp. (9518)

**Therapies:**

bisphosphonate\$.mp. (654)  
 3 (alendronate\$ or fosamax).mp. (533)  
 4 (resindronate\$ or actonel).mp. (7)  
 5 (etidronate\$ or didronel).mp. (251)  
 6 (pamidronate\$ or aredia).mp. (358)  
 7 (zoledronic acid\$ or zometa).mp. (160)  
 8 (selective estrogen receptor modulator\$ or serm\$).mp. (393)  
 9 (raloxifene or evista).mp. (468)  
 10 (calcitonin\$ or miacalcin or calcimar or cibacalcin).mp.  
 (823)  
 11 (parathyroid hormone\$ or pth).mp. (1401)  
 12 (teriparatide or fosteo).mp. (90)  
 13 (exercis\$ and (calcium or vitamin d)).mp. (1177)  
 14 Denosumab.mp. (11)  
 15 Strontium.mp. (172)

16 or/2-15 (5233)

**Combined condition and therapies:**

17 1 and 16 (2036)

**Limits applied (where database will allow):**

19 limit 18 to "middle aged (45 plus years)" (1995)

20 limit 19 to english language (328)

21 limit 20 to yr="2007 - 2008" (323)

from 21 keep 1-318 (323)

## Adverse Event Search

**Database: Ovid MEDLINE(R), Ovid MEDLINE(R) In-Process**

**Search Strategy:**

**Interventions:**

1 (zolendronate or calcitonin or miacalcin or calcimar or cibacalcin or calcium or estrogen or estrogen\$ or oestrogen or estradiol or raloxifene or teriparatide).mp. [mp=title, original title, abstract, name of substance word, subject heading word] (99354)

2 (testosterone or vitamin d).mp. (18970)

3 \*Diphosphonates/ (2107)

4 (bisphosphonate or alendronate or etidronate or ibandronate or pamidronate or risedronate).mp. [mp=title, original title, abstract, name of substance word, subject heading word] (3478)

5 (denosumab or strontium).mp. [mp=title, original title, abstract, name of substance word, subject heading word] (1451)

6 (zolendronate or calcitonin or miacalcin or calcimar or cibacalcin or calcium or estrogen or estrogen\$ or oestrogen or estradiol or raloxifene or teriparatide).mp. [mp=title, original title, abstract, name of substance word, subject heading word] (99354)

7 (testosterone or vitamin d or glucorticoid\$).mp. [mp=title, original title, abstract, name of substance word, subject heading word] (18993)

8 \*Diphosphonates/ (2107)

9 strontium.mp. [mp=title, original title, abstract, name of substance word, subject heading word] (1328)

10 bazedoxifene.mp. [mp=title, original title, abstract, name of substance word, subject heading word] (38)

11 zolendronic acid.mp. [mp=title, original title, abstract, name of substance word, subject heading word] (10)

12 (bisphosphonate or alendronate or etidronate or ibandronate or pamidronate or risedronate).mp. [mp=title, original title, abstract, name of substance word, subject heading word] (3478)

13 or/1-12 (114743)

**Harms filter:**

14 (safe or safety).ti,ab. (101269)  
 15 ((adverse or undesirable or harm\$ or serious or toxic)  
 adj3 (effect\$ or reaction\$ or event\$ or outcome\$)).ti,ab. (67415)  
 16 \*Product Surveillance, Postmarketing/ (536)  
 17 \*Adverse Drug Reaction Reporting Systems/ (754)  
 18 \*Clinical Trials, Phase IV as Topic/ (15)  
 19 \*substance-related disorders/ (6965)  
 20 \*drug toxicity/ (510)  
 21 \*abnormalities, drug induced/ (588)  
 22 \*drug monitoring/ (963)  
 23 \*drug hypersensitivity/ (1336)  
 24 23 or 19 or 15 or 18 or 20 or 16 or 22 or 14 or 17 or 21  
 (161929)  
 25 24 and 13 (5679)

**Study Design filter:**

26 observational.mp. (19304)  
 27 exp Cohort Studies/ (173210)  
 28 case reports.pt. (210794)  
 29 government [publications.pt.](#) (7)  
 30 [guideline.pt.](#) (1455)  
 31 Practice Guideline.pt. (4155)  
 32 technical [report.pt.](#) (520)  
 33 30 or 28 or 31 or 27 or 29 or 26 or 32 (389025)  
 34 24 and 13 (5679)  
 35 33 and 34 (793)

**Specific harms:**

36 atrial [fibrillation.mp.](#) or \*Atrial Fibrillation/ (9878)  
 37 exp Acute Coronary Syndrome/ (1271)  
 38 pulmonary [embolism.mp.](#) or \*Pulmonary Embolism/ (5618)  
 39 Thromboembolism/ or thromboembolic [event.mp.](#) (2786)  
 40 cerebrovascular [accident.mp.](#) or \*Stroke/ (12560)  
 41 \*Esophageal Diseases/ or Esophageal [ulcerations.mp.](#) (527)  
 42 Intestinal Perforation/ or Uterine Perforation/ or  
 Esophageal Perforation/ or Tympanic Membrane Perforation/ or  
 Peptic Ulcer Perforation/ (1904)  
 43 \*Gastroesophageal Reflux/ (2989)  
 44 \*Nausea/ (482)  
 45 \*Vomiting/ (754)  
 46 \*Heartburn/ (130)  
 47 \*Breast Neoplasms/ (29012)  
 48 \*Breast Diseases/ (902)  
 49 \*Uterine Hemorrhage/ (394)  
 50 \*Osteosarcoma/ (1350)  
 51 \*Osteonecrosis/ (944)  
 52 Cardiac [death.mp.](#) or \*Death/ (3952)  
 53 Colon Cancer.mp. or \*Colonic Neoplasms/ (9265)  
 54 Lung Cancer.mp. or \*Lung Neoplasms/ (23752)  
 55 joint [pain.mp.](#) or \*Arthralgia/ (1464)

56 \*Arthritis/ (1424)  
 57 \*Hypocalcemia/ (373)  
 58 (Ear, nose, and throat).mp. [mp=title, original title,  
 abstract, name of substance word, subject heading word] (540)  
 59 Nose Diseases/ (487)  
 60 \*Ear Diseases/ (364)  
 61 [throat.mp.](#) or \*Pharynx/ (3092)  
 62 or/36-61 (111447)  
 63 33 and 13 and 62 (1499)

Limits applied:

64 limit 63 to (english language and humans and yr="2007 -  
 2009") (119)  
 65 from 64 keep 1-767 (119)

Database: EMBASE

-----  
**Strategy for condition (added to improve precision)**

1 exp OSTEOPOROSIS/ (43369)  
 2 exp FRACTURE/ (83643)  
 3 (fracture adj5 prevent\$).tw. (1073)  
 4 exp Bone Density/ (26347)  
 5 [osteopenia.tw](#),sh. (7813)  
 6 exp Bone Demineralization/ (44399)  
 7 exp Bone Atrophy/ (7063)  
 8 exp Bone Metabolism/ (34908)  
 9 (osteop\$ or fractur\$ or BMD).ti,ab. (124088)  
 10 or/1-9 (185768)

**Interventions:**

11 \*Bisphosphonic Acid Derivative/ (3641)  
 12 bisphosphonate\$.ti,ab. (6330)  
 13 exp ZOLEDRONIC ACID/ (3465)  
 14 exp Selective Estrogen Receptor Modulator/ (3503)  
 15 SERM.tw. (634)  
 16 Bazedoxifene.mp. or exp Bazedoxifene/ (142)  
 17 exp RALOXIFENE/ (5723)  
 18 exp CALCITONIN/ (12733)  
 19 exp Parathyroid Hormone/ (19945)  
 20 \*CALCIUM/ (48431)  
 21 \*EXERCISE/ (35167)  
 22 Denosumab.mp. (373)  
 23 Strontium.mp. (7970)  
 24 \*Vitamin D/ (5452)  
 25 or/11-24 (132864)

**Specific harms:**

26 \*Acute Coronary Syndrome/ (2505)  
 27 \*Lung Embolism/ (11427)  
 28 \*Thromboembolism/ (8722)  
 29 \*Esophagus Ulcer/ (651)

30 \*Colon Perforation/ or \*Stomach Perforation/ or \*Digestive  
System Perforation/ or \*Esophagus Perforation/ or \*Intestine  
Perforation/ or \*Small Intestine Perforation/ or \*Appendix  
Perforation/ or \*Perforation/ or \*Duodenum Perforation/ or \*Large  
Intestine Perforation/ or \*Ulcer Perforation/ (6625)  
31 \*Ulcer/ (2197)  
32 \*Nausea/co, si [Complication, Side Effect] (2117)  
33 \*Gastroesophageal Reflux/dm, co, si, th [Disease  
Management, Complication, Side Effect, Therapy] (1477)  
34 \*Heart Atrium Fibrillation/dm, co, si, th (5107)  
35 \*Cerebrovascular Accident/dm, co, si, th (1739)  
36 \*Vomiting/co, si [Complication, Side Effect] (2723)  
37 \*Heartburn/ (789)  
38 \*Breast Cancer/co, si [Complication, Side Effect] (1199)  
39 \*Breast Disease/ or \*Breast Malformation/ or Breast  
[abnormality.mp.](#) (2587)  
40 \*Uterus Bleeding/ (1008)  
41 \*Osteosarcoma/ (7052)  
42 \*Bone Necrosis/ (2179)  
43 Cardiac [death.mp.](#) or \*Heart Death/ (9037)  
44 \*Colon Cancer/ (12293)  
45 \*Lung Cancer/ (25991)  
46 joint [pain.mp.](#) or \*Arthralgia/ (4260)  
47 muscle [pain.mp.](#) or \*Myalgia/ (3802)  
48 \*Muscle Cramp/ (567)  
49 \*Hypocalcemia/ (2149)  
50 \*Ear Nose Throat Disease/ (470)  
51 or/25-50 (245767)

#### Study design:

52 observational.ti,ab. (32108)  
53 cohort [study.mp.](#) or \*Cohort Analysis/ (32730)  
54 case report.ti,ab. (119611)  
55 guideline.ti,ab. (11814)  
56 52 or 53 or 55 or 54 (193374)  
57 25 and 56 and 51 and 10 (494)

#### Limits applied:

58 limit 57 to (human and yr="2007 -Current") (142)  
59 from 58 keep 1-142 (142)  
60 from 59 keep 1-142 (142)

## HOW TO ASSESS FOR OSTEOPOROSIS AND FRACTURE RISK

| Recommendations for Clinical Assessment |                                                                                                                                                                                                                                                                                                                                                                                                                                                                                                                                                                                                                                             |
|-----------------------------------------|---------------------------------------------------------------------------------------------------------------------------------------------------------------------------------------------------------------------------------------------------------------------------------------------------------------------------------------------------------------------------------------------------------------------------------------------------------------------------------------------------------------------------------------------------------------------------------------------------------------------------------------------|
| Assessment                              | Recommended Elements                                                                                                                                                                                                                                                                                                                                                                                                                                                                                                                                                                                                                        |
| History                                 | <p>Identify risk factors for low BMD, future fractures and falls:</p> <ul style="list-style-type: none"> <li><input type="checkbox"/> Prior fragility fractures</li> <li><input type="checkbox"/> Parental hip fracture</li> <li><input type="checkbox"/> Glucocorticoid use</li> <li><input type="checkbox"/> Current smoking</li> <li><input type="checkbox"/> High alcohol intake (<math>\geq 3</math> units per day)</li> <li><input type="checkbox"/> Rheumatoid arthritis</li> <li><input type="checkbox"/> Inquire about falls in the previous 12 months</li> <li><input type="checkbox"/> Inquire about gait and balance</li> </ul> |
| Physical Examination                    | Measure weight (weight loss of $>10\%$ since age 25 is significant)                                                                                                                                                                                                                                                                                                                                                                                                                                                                                                                                                                         |
|                                         | <p>Measure height annually (prospective loss <math>&gt; 2\text{cm}</math>)<br/>(historical height loss <math>&gt; 6\text{ cm}</math>)</p> <p>Measure rib to pelvis distance <math>\leq 2</math> fingers' breadth</p> <p>Measure occiput-to-wall distance (for kyphosis) <math>&gt; 5\text{cm}</math></p>                                                                                                                                                                                                                                                                                                                                    |
|                                         | } Screening for vertebral fractures                                                                                                                                                                                                                                                                                                                                                                                                                                                                                                                                                                                                         |
|                                         | Assess fall risk by using Get-Up-and-Go Test (ability to get out of chair without using arms, walk several steps and return)                                                                                                                                                                                                                                                                                                                                                                                                                                                                                                                |

## REFERENCES (clinical assessment)

1. Brown JP, Josse RG. 2002 clinical practice guidelines for the diagnosis and management of osteoporosis in Canada. *CMAJ* 2002; 167(10 Suppl):S1-34.
2. Lindsay R, Silverman SL, Cortet B, Hanley DA, Barton IP, Broy SB et al. Risk of new vertebral fracture in the year following a fracture. *Journal of the American Medical Association* 2001; 285:320-323.
3. Tinetti ME. Preventing falls in elderly persons. *N Engl J Med* 2003; 348:42-49.
4. Ioannidis G, Papaioannou A, Hopman WM, Akhtar-Danesh N, Anastasiades T, Pickard L et al. Relation between fractures and mortality: results from the Canadian Multicentre Osteoporosis study. *Canadian Medical Association Journal* 2009; 181(5):265-271.
5. Papaioannou A, Kennedy CC, Ioannidis G, Sawka AM, Hopman WM, Pickard L et al. The impact of incident fractures on health-related quality of life: 5 years of data from the Canadian Multicentre Osteoporosis Study. *Osteoporos Int* 2009; 20(5):703-715.
6. Papaioannou A, Kennedy CC, Cranney A, Hawker G, Brown JP, Kaiser SM et al. Risk factors for low BMD in healthy men age 50 years or older: a systematic review. *Osteoporos Int* 2009; 20:507-518.
7. Waugh EJ, Lam MA, Hawker GA, McGowan J, Papaioannou A, Cheung AM et al. Risk factors for low bone mass in healthy 40-60 year old women: A systematic review of the literature. *Osteoporos Int* 2009; 20:1-21.
8. Cummings SR, Nevitt MC, Browner WS, Stone K, Fox KM, Ensrud KE et al. Risk factors for hip fracture in white women. Study of Osteoporotic Fractures Research Group. *N Engl J Med* 1995; 332(12):767-773.
9. Papaioannou A, Joseph L, Ioannidis G, Berger C, Anastasiades T, Brown JP et al. Risk factors associated with incident clinical vertebral and nonvertebral fractures in postmenopausal women: the Canadian Multicentre Osteoporosis Study (CaMos). *Osteoporos Int* 2005; 16(5):568-578.
10. van Staa TP, Leufkens HG, Abenham L, Zhang B, Cooper C. Use of oral corticosteroids and risk of fractures. *J Bone Miner Res* 2000; 15(6):993-1000.
11. American Geriatrics Society, British Geriatrics Society, American Academy of Orthopaedic Surgeons Panel on Falls Prevention. Guideline for the prevention of falls in older persons. *J Am Geriatr Soc* 2001; 49:664-672.
12. Ganz DA, Bao Y, Shekelle PG, Rubenstein LZ. Will my patient fall? *Journal of the American Medical Association* 2007; 297:77-86.
13. Bensen R, Adachi JD, Papaioannou A, Ioannidis G, Olszynski WP, Sebaldt RJ et al. Evaluation of easily measured risk factors in the prediction of osteoporotic fractures. *BMC Musculoskeletal Disorders* 2005; 6:47.
14. Cawthon PM, Fullman RL, Marshall L, Mackey DC, Fink HA, Cauley JA et al. Physical performance and risk of hip fractures in older men. *J Bone Miner Res* 2008; 23:1037-1044.
15. Gates S, Fisher JD, Cooke MW, Carter YH, Lamb SE. Multifactorial assessment and targeted intervention for preventing falls and injuries among older people in community and emergency care settings: systematic review and meta-analysis. *BMJ* 2008; 336(7636):130-133.
16. Kanis J, Johnell O, Gullberg B, Allander E, Elffors L, Ranstam J et al. Risk factors for hip fracture in men from southern Europe: the MEDOS study. *Mediterranean Osteoporosis Study*. *Osteoporos Int* 1999; 9:45-54.
17. Morin S, Tsang JF, Leslie WD. Weight and body mass index predict bone mineral density and fractures in women aged 40 to 59 years. *Osteoporos Int* 2008.
18. Green AD, Colon-Emeric C, Bastian L, Drake MT, Lyles KW. Does this woman have osteoporosis? *Journal of the American Medical Association* 2004; 292(23):2890-2900.
19. Siminoski K, Warshawski RS, Jen H, Lee K. The accuracy of historical height loss for the detection of vertebral fractures in postmenopausal women. *Osteoporos Int* 2006; 17(2):290-296.
20. Briot K, Legrand E, Pouchain D, Monnier S, Roux C. Accuracy of patient-reported height loss and risk factors for height loss among postmenopausal women. *Canadian Medical Association Journal* 2010; 182(6):558-562.
21. Moayyeri A, Luben RN, Bingham SA, Welch AA, Wareham NJ, Khaw KT. Measured height loss predicts fractures in middle-aged and older men and women: the EPIC-Norfolk prospective population study. *J Bone Miner Res* 2008; 23:425-432.
22. Siminoski K, Adachi JG, Hanley DA, Cline G, Ioannidis G, Hodsman A et al. Accuracy of height loss during prospective monitoring for detection of incident vertebral fractures. *Osteoporos Int* 2005; 16(4):403-410.
23. Kaptoge S, Armbrecht G, Felsenberg D, Lunt M, O'Neill TW, Silman AJ et al. When should the doctor order a spine x-ray? Identifying vertebral fractures for osteoporosis care: results from the European Prospective Osteoporosis Study (EPOS). *J Bone Miner Res* 2004; 19:1982-1993.

## Assessment and Management of Falls

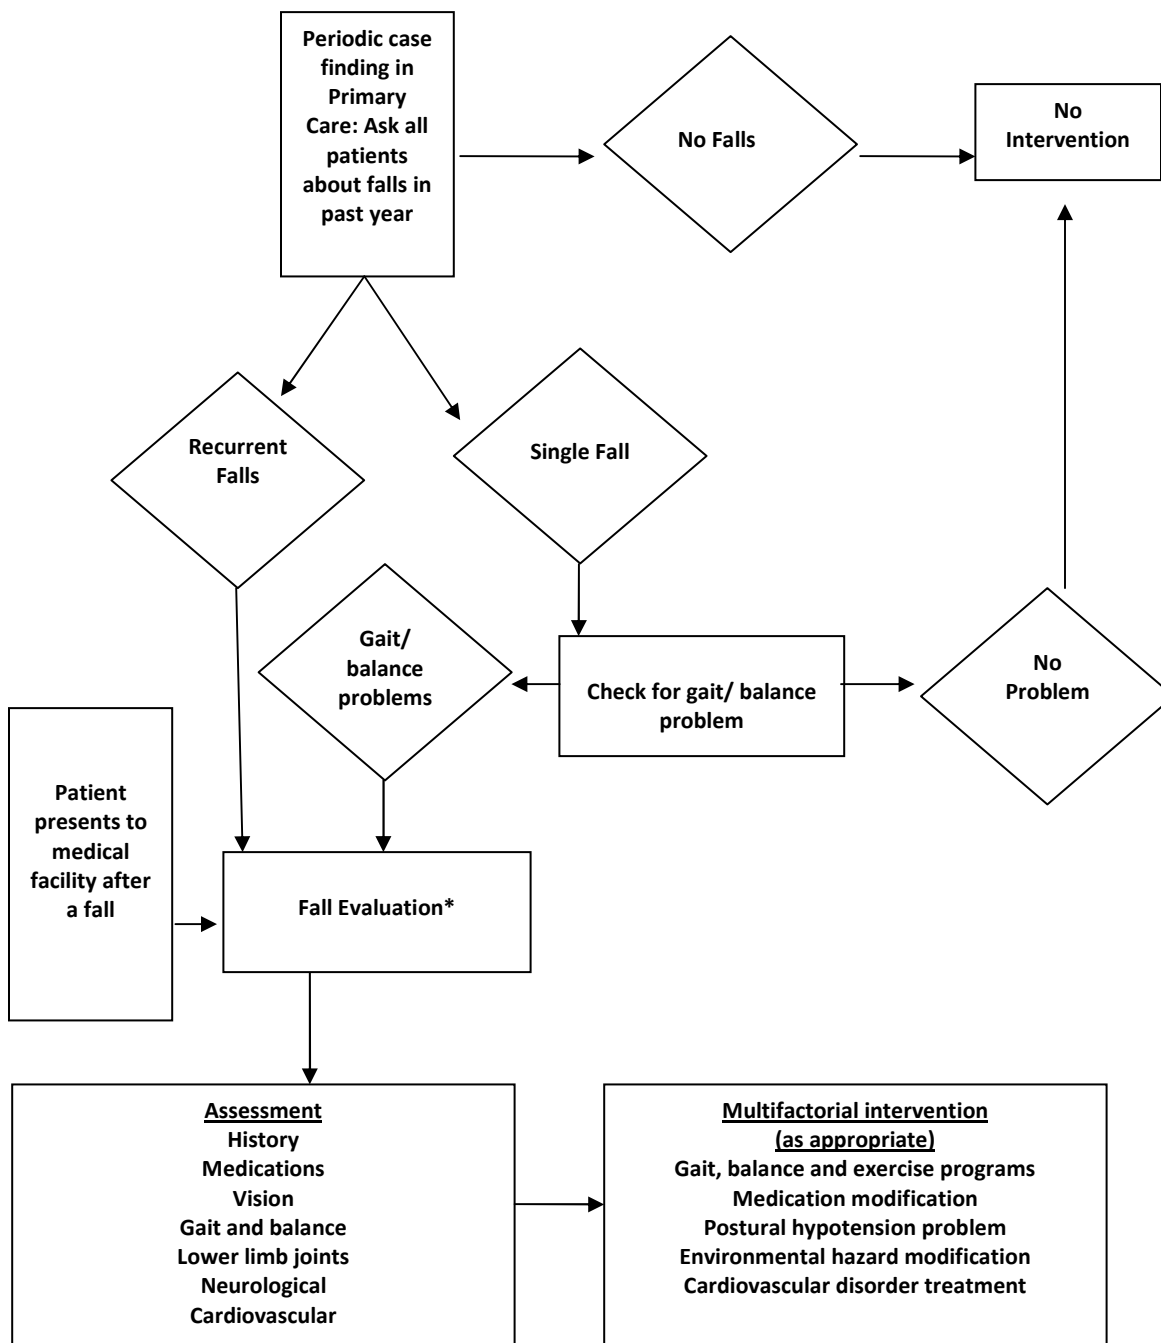

\*See text for details

Reprinted with permission from John Wiley and Sons: Guideline for the prevention of falls in older persons. American Geriatrics Society, British Geriatrics Society, and American Academy of Orthopaedic Surgeons Panel on Falls Prevention. J Am Geriatr Soc. 2001 May;49(5):664-72.

Appendix to: Papaioannou A, Morin S, Cheung AM, et al; for the Scientific Advisory Council of Osteoporosis Canada. 2010 clinical practice guidelines for the diagnosis and management of osteoporosis in Canada: summary. CMAJ 2010. DOI 10.1503/cmaj.100771. Copyright © 2010 Canadian Medical Association or its licensors



## 2010 CAROC Zones of Fracture Risk for Women and Men using Femoral Neck T-Score

| <b>Women</b> |                 |                      |                  |
|--------------|-----------------|----------------------|------------------|
| <b>Age</b>   | <b>Low Risk</b> | <b>Moderate Risk</b> | <b>High Risk</b> |
| 50           | above -2.5      | -2.5 to -3.8         | below -3.8       |
| 55           | above -2.5      | -2.5 to -3.8         | below -3.8       |
| 60           | above -2.3      | -2.3 to -3.7         | below -3.7       |
| 65           | above -1.9      | -1.9 to -3.5         | below -3.5       |
| 70           | above -1.7      | -1.7 to -3.2         | below -3.2       |
| 75           | above -1.2      | -1.2 to -2.9         | below -2.9       |
| 80           | above -0.5      | -0.5 to -2.6         | below -2.6       |
| 85           | above +0.1      | +0.1 to -2.2         | below -2.2       |

| <b>Men</b> |                 |                      |                  |
|------------|-----------------|----------------------|------------------|
| <b>Age</b> | <b>Low Risk</b> | <b>Moderate Risk</b> | <b>High Risk</b> |
| 50         | above -2.5      | -2.5 to -3.9         | below -3.9       |
| 55         | above -2.5      | -2.5 to -3.9         | below -3.9       |
| 60         | above -2.5      | -2.5 to -3.7         | below -3.7       |
| 65         | above -2.4      | -2.4 to -3.7         | below -3.7       |
| 70         | above -2.3      | -2.3 to -3.7         | below -3.7       |
| 75         | above -2.3      | -2.3 to -3.8         | below -3.8       |
| 80         | above -2.1      | -2.1 to -3.8         | below -3.8       |
| 85         | above -2.0      | -2.0 to -3.8         | below -3.8       |

## Vertebral Fracture Recognition and Radiologist Reporting

- Physicians should be aware of the importance of vertebral fracture diagnosis in assessing future osteoporotic fracture risk.
- Vertebral compression fractures incidental to radiologic examinations done for other reasons should be identified and reported.
- Vertebral fractures should be assessed from lateral spinal or chest radiographs according to the semiquantitative method of Genant and colleagues. Grade II (26-40%) and Grade III (>40%) fractures as classified by this method should be given the greatest emphasis.
- Semiquantitative fracture diagnosis should include the recognition of changes such as loss of vertebral end-plate parallelism, cortical interruptions, and quantitative changes in the anterior, midbody, and posterior heights of vertebral bodies.
- When spine radiographs are performed to assess the presence of vertebral fractures, anteroposterior examinations may assist in the initial evaluation.
- The standard follow-up need only consist of single lateral views of the thoracic and lumbar spine that include T4 to L4 vertebrae.
- Dual-energy X-ray absorptiometry examinations that include lateral spinal morphological assessments (VFA, Vertebral Fracture Assessment) may contribute to fracture recognition.
- Educational material about the clinical importance of vertebral fracture recognition as a potential indicator of future osteoporotic fracture risk with its associated morbidity and mortality should be directed to all physicians.

Lentle BC, Brown JP, Khan A, Leslie WD, Levesque J, Lyons DJ et al. Recognizing and reporting vertebral fractures: reducing the risk of future osteoporotic fractures. *Canadian Association of Radiologists Journal* 2007; 58(1):27-36.

## Potential Clinical Role for Bone Turnover Markers (BTMs)

- **BTMs provide an estimate of bone turnover for the entire skeleton, although other organs that may contribute to BTM levels, in addition to the proportion attributed to skeletal turnover.**
- **Bone formation markers most commonly used are osteocalcin, PINP, and BALP and the most commonly used bone resorption markers are NTX and CTX.**
- **Despite their relatively high variability, the differences in BTMs between those with normal (premenopausal) and elevated (osteoporosis) turnover are generally large. This characteristic allows for the use of BTMs to identify those persons at high risk for bone loss and subsequent fracture.**
- **Decreasing controllable variability is crucial, from both the analytical side within the laboratory and the pre-analytical side through careful instructions to patients and standardization in sample collection. By minimizing variability sensitivity is enhanced.**
- **Markers of bone resorption and bone formation may help to assess and assign fracture risk and to monitor the effects of osteoporosis therapy.**

CTX = C-telopeptide, NTX = N-telopeptide, BALP = bone specific alkaline phosphatase, PINP = procollagen type 1 N-terminal propeptide.

Brown JP, Albert C, Nassar BA, Adachi JD, Cole D, Davison KS et al. Bone turnover markers in the management of postmenopausal osteoporosis. *Clin Biochem* 2009; 42(10-11):929-942.

## THERAPIES AND ADVERSE EFFECTS

### First Line Therapies with Evidence for Fracture Prevention in Postmenopausal Women\*

| Type of Fracture           | Antiresorptive Therapy |             |                 |           |            |                              | Bone Formation Therapy |
|----------------------------|------------------------|-------------|-----------------|-----------|------------|------------------------------|------------------------|
|                            | Bisphosphonates        |             |                 | Denosumab | Raloxifene | Hormone Therapy (Estrogen)** | Teriparatide           |
|                            | Alendronate            | Risedronate | Zoledronic Acid |           |            |                              |                        |
| Vertebral                  | ✓                      | ✓           | ✓               | ✓         | ✓          | ✓                            | ✓                      |
| Hip                        | ✓                      | ✓           | ✓               | ✓         | -          | ✓                            | -                      |
| Non-Vertebral <sup>†</sup> | ✓                      | ✓           | ✓               | ✓         | -          | ✓                            | ✓                      |

<sup>†</sup>In clinical trials, non-vertebral fractures are a composite endpoint including hip, femur, pelvis, tibia, humerus, radius, and clavicle.

\* For postmenopausal women, ✓ indicates first line therapies and Grade A recommendation. For men requiring treatment, alendronate, risedronate, and zoledronic acid can be used as first line therapies for prevention of fractures [Grade D].

\*\* Hormone therapy (estrogen) can be used as first line therapy in women with menopausal symptoms.

## ADDITIONAL RISK FACTORS IN MODERATE RISK PATIENTS

### Factors that Warrant Consideration for Pharmacological Therapy in Moderate Risk Patients

- Additional vertebral fracture(s) (>25% height loss with end-plate disruption) identified on VFA or lateral spine X-ray
- Previous wrist fracture in individuals older than age 65 or those with T-score  $\leq -2.5$
- Lumbar spine T-score much lower than femoral neck T-score
- Rapid bone loss
- Men on androgen deprivation therapy for prostate cancer
- Women on aromatase inhibitor therapy for breast cancer
- Long-term or repeated systemic glucocorticoid use (oral or parenteral) that does not meet the conventional criteria for recent prolonged systemic glucocorticoid use (i.e.,  $\geq 3$  months cumulative during the preceding year at a prednisone equivalent dose  $\geq 7.5$  mg daily)
- Recurrent falls defined as falling 2 or more times in the past 12 months
- Other disorders strongly associated with osteoporosis, rapid bone loss or fractures

## ENDORSEMENTS

**Canadian Association of Physician Assistants**  
**Canadian Association of Radiologists**  
**Canadian Chiropractic Association**  
**Canadian Orthopaedic Association**  
**Canadian Osteopathic Association**  
**Canadian Panel of the International Society for Clinical Densitometry**  
**Canadian Pharmacists Association**  
**Canadian Rheumatology Association**  
**Canadian Society of Endocrinology and Metabolism**  
**Dietitians of Canada**  
**Nurse Practitioners' Association of Ontario**  
**Society of Obstetricians and Gynaecologists of Canada**

## Evidence for Risk Prediction Models Tested in Canada

| Author, Year, Design, Country             | Population Size, Sex, Age                                                                        | Number fractures | Risk outcome                                                                                                                  | Results: Independence<br>Discrimination<br>Calibration                                                                                                                                                                                                                                                                                                                                                                                                                                                                                                                                                                                                                                                                                                                                                                                                                                                                                                                                                                                                                    | Level of evidence(1) |
|-------------------------------------------|--------------------------------------------------------------------------------------------------|------------------|-------------------------------------------------------------------------------------------------------------------------------|---------------------------------------------------------------------------------------------------------------------------------------------------------------------------------------------------------------------------------------------------------------------------------------------------------------------------------------------------------------------------------------------------------------------------------------------------------------------------------------------------------------------------------------------------------------------------------------------------------------------------------------------------------------------------------------------------------------------------------------------------------------------------------------------------------------------------------------------------------------------------------------------------------------------------------------------------------------------------------------------------------------------------------------------------------------------------|----------------------|
| Leslie 2008, Historical Cohort, Canada(3) | N=20,579<br><br>Validation: Women, ≥47.5 years (mean 64yrs, SD 10ys). Referred for clinical DXA. | N=1173*          | 10-year probability of Composite (hip, clinical spine, forearm, humerus) from Age and Femoral neck BMD.                       | Independence: Yes (compared with predictions for Age and Femoral neck T-score for Sweden from Kanis J et al: Osteoporos Int 12:989–995, 2001).<br>Discrimination: Strong linear correlation between predicted and observed fracture rates based upon age-only (r = 0.95) and age plus BMD (r = 0.99). Corrected for healthy survival bias (whereby elderly women referred for BMD testing had lower mortality than expected), women had observed fracture rates no different than predicted.<br>Calibration: Swedish 10-year fracture risk data generally applicable to the Canadian female population referred for clinical BMD testing, though fracture rates were underestimated in the oldest and highest risk subgroups due to healthy selection bias.                                                                                                                                                                                                                                                                                                               | 1                    |
| Leslie 2009, Historical Cohort, Canada(4) | N=16,205<br><br>Validation: Women, ≥50 years (mean 65yrs, SD 9yrs). Referred for clinical DXA.   | N=757*           | Rate per 1,000 person-years (proportional to 10-year probability) from Age, BMD, Prior fracture and Major corticosteroid use. | Independence: Yes (validation of CAROC v1.0 system, Siminoski K et al: Can Assoc Radiol J 2005;56:178–188).<br>Discrimination: Significant gradient in fracture rates for risk categories (low, moderate, high). Incremental increase in fracture rates from prior fracture or major corticosteroid use.<br>Calibration: Basal risk (i.e., for age and BMD, no additional risk factors) minimum T-score low (observed 4.1 vs expected <10), moderate (observed 8.4 vs expected 10-20), high (observed 17.1 vs expected >20). Basal risk for femoral neck T-score low (observed 4.8 vs expected <10), moderate (observed 9.1 vs expected 10-20), high (observed 21.9 vs expected >20). Basal risk for total hip T-score low (observed 5.2 vs expected <10), moderate (observed 10.3 vs expected 10-20), high (observed 27.8 vs expected >20). Prior fracture (observed 13.9 vs expected 10) or major corticosteroid use (observed 11.2 vs expected 10). Greater effect of prior fracture at major sites (hip, clinical spine, forearm, humerus) 25.9 than other sites 5.5. | 1                    |

|                                                                                             |                                                                                                                                                                                                          |                                                                                                                   |                                                                                                                                                                                                                                 |                                                                                                                                                                                                                                                                                                                                                                                                                                                                                                                                                                                                                                                                                                                                                                                                                                                                                                                                                                                                                                                                                                                    |   |
|---------------------------------------------------------------------------------------------|----------------------------------------------------------------------------------------------------------------------------------------------------------------------------------------------------------|-------------------------------------------------------------------------------------------------------------------|---------------------------------------------------------------------------------------------------------------------------------------------------------------------------------------------------------------------------------|--------------------------------------------------------------------------------------------------------------------------------------------------------------------------------------------------------------------------------------------------------------------------------------------------------------------------------------------------------------------------------------------------------------------------------------------------------------------------------------------------------------------------------------------------------------------------------------------------------------------------------------------------------------------------------------------------------------------------------------------------------------------------------------------------------------------------------------------------------------------------------------------------------------------------------------------------------------------------------------------------------------------------------------------------------------------------------------------------------------------|---|
| Leslie, 2010, Historical Cohort Canada(5)                                                   | N=39,603 (36,730 women and 2,873 men)<br><br>Women (mean 66yrs, SD 10yrs) and men (mean 68 yrs SD 10yrs) with age >50yrs. Referred for clinical DXA.                                                     | N= 2,543*                                                                                                         | 10-year probability of osteoporotic fracture from Sex, Age, BMD (femoral neck and minimum site), Prior fracture and Major corticosteroid use. Fracture risk categorized as low (<10%), moderate (10-20%) or high (>20%).        | Independence: Yes (validation of CAROC v1.0 system, Siminoski K et al: Can Assoc Radiol J 2005;56:178–188..<br>Discrimination: Significant gradient of fracture risk for risk categories (low, moderate, high) in both men and women. Based upon minimum T-score: 10-year fracture risk in men increased from 6.6% in low risk category to 10.7% in the moderate risk category and 19.5% in the high risk category; risk in women increased from 5.1% in low risk category to 8.2% in the moderate risk category and 20.8% in the high risk category. Based on femoral neck T-score: 10-year fracture risk in men increased from 7.2% in low risk category to 10.7% in the moderate risk category and 22.3% in the high risk category; risk in women increased from 5.6% in low risk category to 10.0% in the moderate risk category and 23.3% in the high risk category. Calibration: Observed ten year fracture risk was at the lower end of the nominal range for the moderate and high risk categories indicating overestimation in risk predictions (slightly greater for minimum than femoral neck T-score). | 1 |
| Ettinger 2005, Historical Cohort (KPMCP), Prospect. Cohort, USA (SOF) and Canada (CaMos)(2) | Derivation (fx rates): Women 45-75 years (70% White, 7.5% African-Am, 8% Latino, 13.5% Asian). N=400,000. Validation: SOF Women age 65-79 years, White, N=~3,400. CaMos Women age 65-79 years, N=~8,600. | Derivation 14,528 fracture fxs incl. 3,412 hip fxs.<br><br>Clinical vertebral, Composite (hip, forearm, humerus). | 5-year absolute fracture risk (six levels <2.5% to >10%) using seven clinical with RRs from literature review (Age, BMI<21, Current smoker, Number prior fxs, Mother or Sister hip fx) and BMD (minimum spine and hip Z-score). | Independence: Yes.<br>Discrimination: Strong linear relationship with the model's predicted fracture risk and observed fracture rates in SOF (non-vertebral and morphometric vertebral) and CaMos (non-vertebral and clinical vertebral). Calibration: Calculated non-vertebral fracture rates about two-fold higher than found in SOF and three-fold higher than found in CaMos. Calculated spine fractures about three-fold higher than found in CaMos and similar to the morphometric spine fracture rate found in SOF.                                                                                                                                                                                                                                                                                                                                                                                                                                                                                                                                                                                         | 2 |

\* Composite (hip, clinical spine, forearm, humerus)

#### REFERENCES

- (1) Durosier C, Hans D, Krieg MA, Schott AM. Prediction and discrimination of osteoporotic hip fracture in postmenopausal women. J Clin Densitom 2006; 9(4):475-495.
- (2) Ettinger B, Hillier TA, Pressman A, Che M, Hanley DA. Simple computer model for calculating and reporting 5-year osteoporotic fracture risk in postmenopausal women. J Womens Health (Larchmt ) 2005; 14(2):159-171.
- (3) Leslie WD, Tsang JF, Lix LM. Validation of ten-year fracture risk prediction: a clinical cohort study from the Manitoba Bone Density Program. Bone 2008; 43(4):667-671.
- (4) Leslie WD, Tsang JF, Lix L, Manitoba Bone Density Program. Simplified system for absolute fracture risk assessment: Clinical validation in Canadian women. J Bone Miner. Res. 24[2], 353-360. 2009.
- (5) Leslie W D, Lix LM. Simplified ten year absolute fracture risk assessment: A comparison of men and women. J Clin Densitom 2010; in press.



### Evidence for Risk Prediction Models Tested in Countries Outside Canada

| Author, Year, Design, Country                           | Population Size, Sex, Age                                                                                               | Number fractures                                                                                | Risk outcome                                                                                                                                                                                                                                                      | Results: Independence, Discrimination, Calibration                                                                                                                                                                                                                                                                                                                                                                                                                                                                                                                                                                                                                                                                                                              | Level of evidence(1) |
|---------------------------------------------------------|-------------------------------------------------------------------------------------------------------------------------|-------------------------------------------------------------------------------------------------|-------------------------------------------------------------------------------------------------------------------------------------------------------------------------------------------------------------------------------------------------------------------|-----------------------------------------------------------------------------------------------------------------------------------------------------------------------------------------------------------------------------------------------------------------------------------------------------------------------------------------------------------------------------------------------------------------------------------------------------------------------------------------------------------------------------------------------------------------------------------------------------------------------------------------------------------------------------------------------------------------------------------------------------------------|----------------------|
| Abrahamsen B, 2006, Modified RCT (Controls), Denmark(1) | N=872<br>Healthy women 45-58 ys (Mean 50.7, SD 2.9) and either 3-24 m past last menses or with perimenopausal symptoms. | Composite (clinical spine N=8, hip N=1, forearm N=64, proximal humerus N=7). Any fx N=78 women. | 10-year fx risk (clinical spine, hip, forearm, shoulder) from Age and Total hip T-score.                                                                                                                                                                          | Independence: Yes (compared with predictions for Age and Femoral neck T-score for Sweden from Kanis J et al: Osteoporos Int 12:989–995, 2001).<br>Discrimination: The risk of fracture increased by 1.32 (95% CI, 1.02; 1.70) for each unit decrease in femoral neck T score and by 1.30 (95% CI, 1.06; 1.58) for each unit decrease in lumbar spine T score at baseline. Relative risk gradients were similar to those of the recent meta-analysis.<br>Calibration: Absolute fracture risk higher than expected from the Kanis algorithm at all T-score levels: (Observed versus Expected) +1 (6.3% vs 2.4%), +0.5 (7.2% vs 3.0%), 0 (8.2% vs 3.8%), -0.5 (9.4% vs 4.7%), -1 (10.7% vs 5.9%), -1.5 (12.0% vs 7.4%), -2 (13.6% vs 9.2%), -2.5 (15.4% vs 11.3%). | 1                    |
| Ahmed LA, 2006, Prospect. Cohort, Norway(2)             | N=5,364<br>Women, Age 65-84 (TROST)                                                                                     | Hip fx (N=49 over 5 years)                                                                      | Point score (Age≥80, Weight or BMI, Height, Maternal hip fracture, Fracture after age 50, Self-reported health, Physically inactive, Long-acting benzodiazepines, Anticonvulsant drugs, Pulse rate, Caffeine intake, Unable to rise from chair, Hyperthyroidism). | Independence: Yes (modified version of risk score from Cummings SR: N Engl J Med 1995; 332: 767–773).<br>Discrimination: 5-year hip fracture risk for score 0-2 2.8% (95% CI 1.6–3.9% ) vs 5+ 11% (95% CI 3.7-18.2%). Independent stratification using point score and forearm BMD tertile.<br>Calibration: Not assessed.                                                                                                                                                                                                                                                                                                                                                                                                                                       | 2                    |

|                                               |                                                                      |                                                                                                                                                                                    |                                                                                                                                                                                                         |                                                                                                                                                                                                                                                                                                                                                                                                                                                                                                                                                                                                                                                                           |   |
|-----------------------------------------------|----------------------------------------------------------------------|------------------------------------------------------------------------------------------------------------------------------------------------------------------------------------|---------------------------------------------------------------------------------------------------------------------------------------------------------------------------------------------------------|---------------------------------------------------------------------------------------------------------------------------------------------------------------------------------------------------------------------------------------------------------------------------------------------------------------------------------------------------------------------------------------------------------------------------------------------------------------------------------------------------------------------------------------------------------------------------------------------------------------------------------------------------------------------------|---|
| Bagger YZ, 2006, Prospect. Cohort, Denmark(3) | Postmenopausal women age 45-70 (Mean 63.7, SD=8.1).                  | Incident fx (N=1,591) during mean 7.3 years, Vertebral (radiographic), Nonvertebral (wrist, hip, humeral fracture, rib, ankle, and foot), Any fracture. Trauma fractures excluded. | Fx rate per 1,000 person-years.                                                                                                                                                                         | Independence: Not assessed (derivation only).<br>Discrimination: Rates of osteoporotic fracture increased with decreasing bone mass at all three skeletal sites (P<0.001). Osteoporotic BMD (T-score $\leq$ -2.5) had similar predictive values of fractures regardless of the skeletal site of measurement. Absolute risk of osteoporotic fractures increased with increasing age at the same level of bone mass. Women with prior osteoporotic fractures had increased relative risk of new fracture after adjustment for age and BMD.<br>Calibration: Not assessed (derivation only).                                                                                  | 2 |
| Black D, 2001, Prospect. Cohort, USA(4)       | N=7,782 Caucasian women, ambulatory $\geq$ 65years (mean 73.3 years) | Hip (N=231), morphometric vertebral (N=N/A), non-vertebral (N=N/A)                                                                                                                 | 5-year risk from FRACTURE Index (five ordinal age categories; total hip T-score, fracture after age 50 years, maternal hip fracture, weight less than 57 kg, smoking, use of arms to stand from chair). | Independence: Yes for hip fracture prediction (French EPIDOS cohort, 7575 women aged 75 years and older, mean 80.5 years, 261 hip fx after 4 years).<br>Discrimination (FRACTURE Index with BMD): Derivation cohort hip fx prediction area under the ROC curve 0.766. Hip fx prediction (derivation vs validation) Index 1-2 (0.4%), 3-4 (0.9%), 5 (1.9%), 6-7 (3.9%), 8-13 (8.7%). Non-vertebral fx prediction (derivation only) Index 1-2 (8.6%), 3-4 (13.1%), 5 (16.5%), 6-7 (19.8%), 8-13 (27.5%). Vertebral fx prediction (derivation only) Index 1-2 (1.2%), 3-4 (2.5%), 5 (5.3%), 6-7 (7.1%), 8-13 (11.2%).<br>Calibration: Not assessed (non-quantitative system) | 2 |

|                                                |                                                                                                 |                                                                                                                              |                                                                                                                                                                                                                                                                                                                                                                                      |                                                                                                                                                                                                                                                                                                                                                                                                                                                                                                                                                                                                                                                                                                                                                                                |   |
|------------------------------------------------|-------------------------------------------------------------------------------------------------|------------------------------------------------------------------------------------------------------------------------------|--------------------------------------------------------------------------------------------------------------------------------------------------------------------------------------------------------------------------------------------------------------------------------------------------------------------------------------------------------------------------------------|--------------------------------------------------------------------------------------------------------------------------------------------------------------------------------------------------------------------------------------------------------------------------------------------------------------------------------------------------------------------------------------------------------------------------------------------------------------------------------------------------------------------------------------------------------------------------------------------------------------------------------------------------------------------------------------------------------------------------------------------------------------------------------|---|
| Chen P, 2009, Prospect Cohort,, Canada(5)      | N=2761 with complete results (of 7,753). Men and women ≥50 years (Age Mean 64.3, 71.9% female). | Incident fragility vertebral morphometric (N=343), nonvertebral (hip, forearm/wrist, ribs, pelvis, and other), N=200, Any fx | 5-year risk of any incident fragility fx from Sex, Age, Femoral neck T-score and Spine fx (morphometric)                                                                                                                                                                                                                                                                             | Independence: Not assessed (derivation only). Discrimination: The GR for the original WHO risk factors was 1.88 (ROC AUC 0.67) and including spine fx status (yes/no) improved the GR to 2.08 (AUC 0.70). Fracture risk increased in both men and women with increasing age, more negative T-score, and presence of spine fracture. A model considering these three risk factors captured almost all of the predictive information (AUC 0.69) provided by a model considering spine fracture status plus the WHO risk factors (AUC 0.70). Calibration: Not independently assessed.                                                                                                                                                                                             | 2 |
| Ensrud KE, 2008, Prospect Cohort (SOF), USA(6) | N=6701. Caucasian women ≥65 years (Mean 76.7 years, SD 4.8).                                    | Non-spine fx (N=2,200 after 7.9 years) and Hip fx (N=707 after 9.3 years).                                                   | Hip fx rate (per 1,000 person years) and Relative risk of falls, disability, fracture, and death from SOF index (weight loss, inability to rise from a chair 5 times without using arms, and reduced energy level) versus CHS index (unintentional weight loss, poor grip strength, reduced energy level, slow walking speed, and low level of physical activity). No BMD variables. | Independence: No (internal cross-validation performed). Discrimination: Hip fx rate (per 1,000 person years) from CHS index robust 30.2, intermediate 43.5, frail 78.4; from SOF index robust 32.9, intermediate 44.8, frail 70.7. Frail women had a higher age-adjusted risk of recurrent falls (odds ratio, 2.4), disability (odds ratio, 2.2-2.8), nonspine fracture (hazard ratio, 1.4-1.5), hip fracture (hazard ratio, 1.7-1.8), and death (hazard ratio, 2.4-2.7). AUC revealed no differences between CHS index vs the SOF index in discriminating falls (AUC = 0.6; P = .66), disability (AUC = 0.64; P = .23), nonspine fracture (AUC = 0.55; P = .80), hip fracture (AUC = 0.63; P = .64), or death (AUC = 0.72; P = .10). Calibration: Not independently assessed. | 2 |

|                                                                               |                                                                                                                                                                                |                                                                                                                                    |                                                                                                                                                                                                                       |                                                                                                                                                                                                                                                                                                                                                                                                                                                                                                                                                                                                                                                                             |   |
|-------------------------------------------------------------------------------|--------------------------------------------------------------------------------------------------------------------------------------------------------------------------------|------------------------------------------------------------------------------------------------------------------------------------|-----------------------------------------------------------------------------------------------------------------------------------------------------------------------------------------------------------------------|-----------------------------------------------------------------------------------------------------------------------------------------------------------------------------------------------------------------------------------------------------------------------------------------------------------------------------------------------------------------------------------------------------------------------------------------------------------------------------------------------------------------------------------------------------------------------------------------------------------------------------------------------------------------------------|---|
| Kanis JA, 2001, Retrospect. Cohort with Statist. Modelling, Sweden (Malmo)(7) | N=not reported. Men and women >45 years,                                                                                                                                       | Composite (hip, clinical spine, forearm, humerus)                                                                                  | 10-year fx risk (clinical spine, hip, forearm, shoulder) from Sex, Age and Femoral neck T-score.                                                                                                                      | Independence: Not assessed (derivation only).<br>Discrimination: 10 year fracture probabilities increased with decreasing T-score and increasing age (with the exception of forearm in men), Age is an independent risk factor not captured by BMD. For a given BMD there was a 3- to 7-fold increase in risk over 50 years depending on the T-score. A similar phenomenon was observed in both sexes for all fracture types.<br>Calibration: Not assessed (derivation only).                                                                                                                                                                                               | 3 |
| Kanis JA, 2007, Multiple Prospect. Cohorts(8)                                 | N=46,340, 9 Primary derivation cohorts (Mean age 65 years, 68% female) comprising Rotterdam, EVOS/EPOS, CaMos, Rochester, Sheffield, DOES, Hiroshima and Gothenburg I and II). | Hip (primary N=850, validation N=3,350) and Composite (hip, clinical spine, forearm, humerus; primary N=4,168, validation 18,533). | 10-year probability of Hip and Composite (hip, clinical spine, forearm, humerus) from FRAX (Sex, Age, BMI, Prior fracture, Parental hip fracture, Corticosteroids, RA, Smoking, Alcohol intake and Femoral neck BMD). | Independence: Yes (11 Validation cohorts (N=230,486, Mean age 63 years, 100% female).<br>Discrimination: GR (at age 70) in primary cohorts for hip fx (2.91, 95%CI 2.56–3.31, ROC AUC 0.78) and Composite fx (1.61, 95%CI 1.54–1.68, ROC AUC 0.63). GR and AUC were comparable in the validation cohorts compared with the original cohorts. For example, for hip fracture prediction with BMD, the mean AUC was 0.74 in the validation cohorts compared with 0.78 in the original cohorts. For all osteoporotic fracture prediction with BMD, the mean AUC was 0.62 in the validation cohorts and 0.63 in the original cohorts.<br>Calibration: N/A (population specific). | 1 |

|                                                             |                                                                                                                                                 |                                                                   |                                                                                                                                         |                                                                                                                                                                                                                                                                                                                                                                                                                                                                                                                                                                                         |   |
|-------------------------------------------------------------|-------------------------------------------------------------------------------------------------------------------------------------------------|-------------------------------------------------------------------|-----------------------------------------------------------------------------------------------------------------------------------------|-----------------------------------------------------------------------------------------------------------------------------------------------------------------------------------------------------------------------------------------------------------------------------------------------------------------------------------------------------------------------------------------------------------------------------------------------------------------------------------------------------------------------------------------------------------------------------------------|---|
| Melton LJ, 2005, Prospect. Cohort, USA (Rochester)(9)       | N=393. Postmenopausal Women (99% White).                                                                                                        | Any new fx (median 11.3 years, N=503 fxs in 212 women)            | NOF model based on Femoral neck BMD, Personal fracture history, Family history of osteoporotic fracture, low body weight, and smoking). | Independence: Yes (validation of NOF model). Discrimination: Primary analysis compared the number of fractures observed at specific skeletal sites with the numbers predicted. General concordance between observed and predicted fractures of the hip (SIR, 0.78; 95% CI, 0.56-1.01), distal forearm (SIR, 1.22; 95% CI, 0.86-1.68), spine (SIR, 0.76; 95% CI, 0.50-1.11), and all other sites combined (SIR, 1.18; 95% CI, 0.97-1.42). Fracture prediction by the NOF model was about as good after 10 years as it was earlier during follow-up. Calibration: No explicitly reported. | 2 |
| Moayeri A, 2009 Prospect. Cohort, United Kingdom (EPIC)(10) | N = 25,311 (13,835 women, 11,476 men). 40-79 year old men and women in the European Prospective Investigation into Cancer Norfolk study (EPOS). | Incident fractures, N = 925 (334 hip, 154 spine, 219 wrist)       | Ten-year absolute risk of any fracture from age, history of fracture, BMI, smoking status, and alcohol intake (sex-specific models)     | Independence: Yes (internal split-sample validation). Discrimination: Fractures increased with age: in men from 1.0 without vs. 1.2% with prior fracture at age 40 years to 3.0 without vs. 4.4% with prior fracture at age 75 years. In women from 0.7 vs. 1.0% at 40 years age to 9.3 vs. 17.2% at age 75 years. C-index (AUC) for any incident fracture 0.70-0.72 in women and 0.60-0.63 in men; for hip fracture 0.78-0.82 in women and 0.79 in men. Calibration: Not assessed.                                                                                                     | 2 |
| Nguyen ND, 2007, Prospect. Cohort, Australia (DOES)(11)     | 1,028 women and 740 men ≥60ys, 98.6% Caucasian                                                                                                  | Hip fx (N=127) over 13 yrs follow-up. Excln fx from major trauma. | Tables and nomograms for 5-year and 10-year hip fracture probability (Age, Femoral neck BMD, Prior fracture and History of falls).      | Independence: No (internal validation by the bootstrap method). Discrimination: The area under the ROC curves was 0.85. Internal validation by the bootstrap method suggested that the bias-corrected estimate of predictive discrimination of 0.70 for women and 0.65 for men. Calibration: Not independently assessed. The maximum calibration error in predicting probability of fracture was about 2% for women and 7% for men by the bootstrap method.                                                                                                                             | 3 |

|                                                         |                                                                                                                                                             |                                                                                                                |                                                                                                                                                                                                                                                                                                                 |                                                                                                                                                                                                                                                                                                                                                                                                                                                       |   |
|---------------------------------------------------------|-------------------------------------------------------------------------------------------------------------------------------------------------------------|----------------------------------------------------------------------------------------------------------------|-----------------------------------------------------------------------------------------------------------------------------------------------------------------------------------------------------------------------------------------------------------------------------------------------------------------|-------------------------------------------------------------------------------------------------------------------------------------------------------------------------------------------------------------------------------------------------------------------------------------------------------------------------------------------------------------------------------------------------------------------------------------------------------|---|
| Nguyen ND, 2008, Prospect. Cohort, Australia (DOES)(12) | 1,358 women and 858 men ≥60ys. Women Mean 71ys, SD=8. Men Mean 70ys, SD=6.                                                                                  | Low trauma , non-pathological clinical fx (women 426, men 149 during 13 years). Excl digit, head, cervical fx. | Nomograms for 5-year and 10-year fracture risk (used Age, Fracture history, Fall history, and BMD T-score or Weight).                                                                                                                                                                                           | Independence: No (internal validation by the bootstrap method). Discrimination: Receiver operating characteristic curve suggested that model with BMD (AUC = 0.75 for both sexes) performed better than model with weight (AUC = 0.72 for women and 0.74 for men). Calibration: Maximum calibration error in predicting probability of fracture was 0.4% in women and 0.6–1.9% in men by the bootstrap method.                                        | 2 |
| Robbins J, 2007, Prospect. Cohort, USA (WHI)(13)        | N=93,676. Validation (Clinical Trial HRT, (low fat diet), Calc/Vit D) N>60,000 (10,750 with DXA). Women, 50-79 years, White 84%. Derivation (Observ. Study) | Hip fx (N=1132 derivation, N=791 validation incl. 80 with DXA).                                                | 5-year risk of hip fx from summed point score (eleven factors: age, self-reported health, weight, height, race/ethnicity, self-reported physical activity, history of fracture after age 54 years, parental hip fracture, current smoking, current corticosteroid use, and treated diabetes). No BMD variables. | Independence: Yes<br>Discrimination: Receiver operating characteristic curves in the validation cohort showed AUC 80% (95% confidence interval [CI], 0.77%-0.82%). For DXA subgroup, DXA prediction AUC 79% (95% CI, 73%-85%) vs WHI algorithm 71% (95% CI, 66%-76%).<br>Calibration (Observed vs Predicted in DXA subgroup): T-score >-2.5 (60 vs 57), T-score ≤-2.5 (20 vs 23), WHO point score <21 (65 vs 64.9), WHO point score ≥21 (15 vs 15.1). | 1 |

*BMD = bone mineral density, BMI = body mass index, DXA = dual energy x-ray densitometry, Fx = fracture, SD = standard deviation, HRT = hormone replacement therapy, ROC = receiver operating curve, AUC = area under curve, CI = confidence interval, GR = gradient of risk, SIR = standardized incidence ratio.*

#### REFERENCES

- (1) Abrahamsen B, Vestergaard P, Rud B, Barenholdt O, Jensen JE, Nielsen SP et al. Ten-year absolute risk of osteoporotic fractures according to BMD T score at menopause: the Danish Osteoporosis Prevention Study. *Journal of Bone & Mineral Research* 2006; 21(5):796-800.
- (2) Ahmed LA, Schirmer H, Fonnebo V, Joakimsen RM, Berntsen GK, Ahmed LA et al. Validation of the Cummings' risk score; how well does it identify women with high risk of hip fracture: the Tromso Study. *European Journal of Epidemiology* 2006; 21(11):815-822.
- (3) Bagger YZ, Tanko LB, Alexandersen P, Hansen HB, Qin G, Christiansen C et al. The long-term predictive value of bone mineral density measurements for fracture risk is independent of the site of measurement and the age at diagnosis: results from the Prospective Epidemiological Risk Factors study. *Osteoporos Int* 2006; 17(3):471-477.
- (4) Black DM, Steinbuch M, Palermo L, Dargent-Molina P, Lindsay R, Hoseney MS et al. An assessment tool for predicting fracture risk in postmenopausal women. *Osteoporos Int* 2001; 12(7):519-528.

- (5) Chen P, Klege JH, Adachi JD, Prior JC, Tenenhouse A, Brown JP et al. Vertebral fracture status and the World Health Organization risk factors for predicting osteoporotic fracture risk. *J Bone Miner Res* 2009; 24(3):495-502.
- (6) Ensrud KE, Ewing SK, Taylor BC, Fink HA, Cawthon PM, Stone KL et al. Comparison of 2 frailty indexes for prediction of falls, disability, fractures, and death in older women.[see comment]. *Arch Intern Med* 2008; 168(4):382-389.
- (7) Kanis JA, Johnell O, Oden A, Dawson A, De Laet C, Jonsson B. Ten year probabilities of osteoporotic fractures according to BMD and diagnostic thresholds. *Osteoporos Int* 2001; 12(12):989-995.
- (8) Kanis JA, Oden A, Johnell O, Johansson H, De Laet C, Brown J et al. The use of clinical risk factors enhances the performance of BMD in the prediction of hip and osteoporotic fractures in men and women. *Osteoporos Int* 2007; 18(8):1033-1046.
- (9) Melton LJ, III, Atkinson EJ, Khosla S, Oberg AL, Riggs BL, Melton LJ et al. Evaluation of a prediction model for long-term fracture risk. *Journal of Bone & Mineral Research* 2005; 20(4):551-556.
- (10) Moayyeri A, Kaptoge S, Luben RN, Wareham NJ, Bingham S, Reeve J et al. Estimation of absolute fracture risk among middle-aged and older men and women: the EPIC-Norfolk population cohort study. *European Journal of Epidemiology* 2009; 24(5):259-266.
- (11) Nguyen ND, Frost SA, Center JR, Eisman JA, Nguyen TV, Nguyen ND et al. Development of a nomogram for individualizing hip fracture risk in men and women. *Osteoporos Int* 2007; 18(8):1109-1117.
- (12) Nguyen ND, Frost SA, Center JR, Eisman JA, Nguyen TV, Nguyen ND et al. Development of prognostic nomograms for individualizing 5-year and 10-year fracture risks. *Osteoporos Int* 2008; 19(10):1431-1444.
- (13) Robbins J, Aragaki AK, Kooperberg C, Watts N, Wactawski-Wende J, Jackson RD et al. Factors associated with 5-year risk of hip fracture in postmenopausal women. *JAMA* 2007; 298(20):2389-2398.

## Evidence of Randomized Controlled Trials on Therapies

| Study<br>Country of<br>Origin<br>Total Number<br>of Patients                                          | Age (yr, mean)/<br>% Female | Baseline mean BMD<br>(t-score or g/cm <sup>2</sup> )<br>% Fractures | Intervention<br>(dose)                                                                                                       | Outcome                                                  | # Fractures/<br>total<br>treated | # Fractures/<br>total control | Effect<br>(95% CI)          | NNT* | ARR <sup>^</sup>     | Level of<br>Evidence |
|-------------------------------------------------------------------------------------------------------|-----------------------------|---------------------------------------------------------------------|------------------------------------------------------------------------------------------------------------------------------|----------------------------------------------------------|----------------------------------|-------------------------------|-----------------------------|------|----------------------|----------------------|
| <b>Bouxsein<br/>et al., 2009(1)<br/>USA</b><br><br><b>N = 1226<br/>(from 2 RCTs,<br/>n=398, n=82)</b> | 68.7 years<br>100%          | Lumbar spine: -2.7<br>Mean number of<br>vertebral fractures: 2.2    | Teriparatide<br>(20mg or 40mg)<br><br>Raloxifene<br>(60mg or 120mg)                                                          | Teriparatide:<br>Any new<br>vertebral fracture           | NR                               | NR                            | RR=0.28<br>(0.20-<br>0.38)  | NR   | NR                   | Level<br>1           |
|                                                                                                       |                             |                                                                     |                                                                                                                              | Teriparatide:<br>New adjacent<br>fracture                | NR                               | NR                            | RR= 0.25<br>(0.15-<br>0.41) | NR   | NR                   |                      |
|                                                                                                       |                             |                                                                     |                                                                                                                              | Teriparatide:<br>New non-<br>adjacent<br>fracture        | NR                               | NR                            | RR= 0.30<br>(0.19-<br>0.46) | NR   | NR                   |                      |
|                                                                                                       |                             |                                                                     |                                                                                                                              | Raloxifene:<br>Any new<br>vertebral<br>fracture          | NR                               | NR                            | RR=0.46<br>(0.38-<br>0.57)  | NR   | NR                   |                      |
|                                                                                                       |                             |                                                                     |                                                                                                                              | Raloxifene:<br>New adjacent<br>fracture                  | NR                               | NR                            | RR=0.46<br>(0.38-<br>0.61)  | NR   | NR                   |                      |
|                                                                                                       |                             |                                                                     |                                                                                                                              | Raloxifene: New<br>non-adjacent<br>fracture              | NR                               | NR                            | RR=0.47<br>(0.36-<br>0.62)  | NR   | NR                   |                      |
| <b>Campbell et al.,<br/>2009(2)<br/>United Kingdom</b><br><br><b>N = 50</b>                           | <60years<br>100%            | BMD: NR<br>Fractures: NR                                            | HRT: minimum<br>2mg oestradiol;<br>0.625mg<br>conjugated<br>estrogen; 50mcg<br>transdermal<br>estradiol<br>Etidronate: 400mg | HRT: New<br>vertebral/ non-<br>vertebral fractures       | 0/12                             | 3/24<br>(12.5%)               | p=0.25                      | NR   | 4.8<br>(3.9-<br>5.8) | Level<br>1           |
|                                                                                                       |                             |                                                                     |                                                                                                                              | Etidronate: New<br>vertebral/non-<br>vertebral fractures | 1/24<br>(4.2%)                   | 2/23<br>(8.7%)                | p=0.97                      |      |                      |                      |

\*Numbers needed to treat, ^Absolute Risk Reduction



|                                                                                                                                                                                      |                                                                               |                                                                                                    |                             |                                       |                  |                 |                                |    |                |         |
|--------------------------------------------------------------------------------------------------------------------------------------------------------------------------------------|-------------------------------------------------------------------------------|----------------------------------------------------------------------------------------------------|-----------------------------|---------------------------------------|------------------|-----------------|--------------------------------|----|----------------|---------|
| <b>Cummings et al., 2009(3)</b><br><br><b>Multi-center, International (USA, United Kingdom, Australia, France, Czech Republic, Italy, Argentina, Denmark)</b><br><br><b>N = 7808</b> | 60-90years<br>100%<br>Intervention:<br>72.3years<br><br>Control:<br>72.3years | Lumbar spine: -2.8<br><br>Total hip: -1.9<br><br>Femoral neck: -2.2<br><br>27% vertebral fractures | Denosumab 60mg              | New vertebral fracture                | 86/3702 (2.3%)   | 264/3691 (7.2%) | 0.32 (0.26 to 0.41)<br>p<0.001 | NR | 4.8 (3.9-5.8)  | Level 1 |
|                                                                                                                                                                                      |                                                                               |                                                                                                    |                             | Nonvertebral fracture                 | 238/3702 (6.4%)  | 293/3691 (7.9%) | 0.80 (0.67 to 0.95)<br>0.01    | NR | 1.5 (0.3-2.7)  |         |
|                                                                                                                                                                                      |                                                                               |                                                                                                    |                             | Hip fracture                          | 26/3702 (.70%)   | 42/3691 (1.1%)  | 0.60 (0.37 to 0.97)<br>0.04    | NR | 0.3 (-0.1-0.7) |         |
|                                                                                                                                                                                      |                                                                               |                                                                                                    |                             | New clinical vertebral fracture       | 29/3702 (.78%)   | 92/3691 (2.5%)  | 0.31 (0.20 to 0.47)<br><0.001  | NR | 1.7 (1.1-2.3)  |         |
|                                                                                                                                                                                      |                                                                               |                                                                                                    |                             | Multiple (≥2) new vertebral fractures | 23/3702 (.62%)   | 59/3691 (1.6%)  | 0.39 (0.24 to 0.63)<br><0.001  | NR | 1.0 (0.5-1.5)  |         |
| <b>Ensrud et al., 2008(4)*</b><br><b>United States</b><br><br><b>N = 10, 101</b>                                                                                                     | 67.5 years<br>100%                                                            | BMD not performed<br><br>6% history of fracture                                                    | Raloxifene (60 mg/d orally) | Non-vertebral fracture                | 428/ 5044 (8.5%) | 438/5057 (8.7%) | HR = 0.96 (0.84-1.10)          | NR | NR             | Level 1 |
|                                                                                                                                                                                      |                                                                               |                                                                                                    |                             | Clinical vertebral fracture           | 64/5044 (1.3%)   | 97/5057 (1.9%)  | HR = 0.65 (0.47 - 0.89)        | NR | NR             |         |

|                                                                                              |                                           |                                                 |                         |                                                                                    |                   |                     |                                                                     |    |    |            |
|----------------------------------------------------------------------------------------------|-------------------------------------------|-------------------------------------------------|-------------------------|------------------------------------------------------------------------------------|-------------------|---------------------|---------------------------------------------------------------------|----|----|------------|
| <b>Jamal et al., 2007(5)</b><br><b>Multi-center: Canada &amp; USA</b><br><br><b>N = 6458</b> | 55-80 years<br>100%                       | femoral neck<br>$\leq 0.68\text{g/cm}^2$        | 5mg of<br>alendronate** | Clinical fractures<br>regardless of renal<br>function                              | NR                | NR                  |                                                                     | NR | NR | Level<br>1 |
|                                                                                              | eGFR<br><45ml/minute<br>:<br>74.6 years   | eGFR<br><45ml/minute:<br>$0.54\text{g/cm}^2$    |                         | Spinal fractures<br>regardless of renal<br>function                                | NR                | NR                  |                                                                     | NR | NR |            |
|                                                                                              | eGFR $\geq$<br>45ml/minute:<br>68.1 years | eGFR $\geq$ 45ml/minute:<br>$0.59\text{g/cm}^2$ |                         | Clinical Fractures                                                                 | NR                | NR                  | Severely<br>reduced eGFR<br>:<br>Moderately<br>reduced or<br>normal | NR | NR |            |
|                                                                                              |                                           |                                                 |                         | Spinal Fractures                                                                   | NR                | NR                  | Severely<br>reduced eGFR<br>:<br>Moderately<br>reduced or<br>normal | NR | NR |            |
|                                                                                              |                                           |                                                 |                         | Clinical Fractures<br>Women with<br>osteoporosis (n =<br>3214)<br>With Alendronate | NR                | NR                  | Severely<br>reduced eGFR<br>:<br>Moderately<br>reduced or<br>normal | NR | NR |            |
|                                                                                              |                                           |                                                 |                         | Spinal Fractures<br>Women with<br>osteoporosis (n =<br>3214)<br>With Alendronate   | NR                | NR                  | Severely<br>reduced eGFR<br>:<br>Moderately<br>reduced or<br>normal | NR | NR |            |
|                                                                                              |                                           |                                                 |                         | Non-vertebral<br>fracture                                                          | 79/1065<br>(7.6%) | 107/1062<br>(10.7%) | HR: 0.73 (0.55-<br>0.98) p=.03                                      | NR | NR |            |
|                                                                                              |                                           |                                                 |                         | Hip fracture                                                                       | 23/1065<br>(2.0%) | 33/1062<br>(8.5%)   | HR: 0.70 (0.41-<br>1.19) p=.18                                      | NR | NR |            |
|                                                                                              |                                           |                                                 |                         | Vertebral                                                                          | 21/1065<br>(1.7%) | 39/1062<br>(3.8%)   | HR: 0.54(0.32-<br>0.92) p=.02                                       | NR | NR |            |

|                                                                      |                                                                                                   |                                                                                   |                                                                           |                                                             |                   |                   |                  |    |      |            |
|----------------------------------------------------------------------|---------------------------------------------------------------------------------------------------|-----------------------------------------------------------------------------------|---------------------------------------------------------------------------|-------------------------------------------------------------|-------------------|-------------------|------------------|----|------|------------|
| <b>Ringe et al., 2009(6)</b><br><b>Germany</b><br><br><b>N = 316</b> | Intervention:<br>55.8years                                                                        | Intervention:<br>Lumbar spine -3.34<br>Femoral neck -2.63<br>Total hip -2.45      | Risedronate 5mg<br>(plus 1000mg<br>elementary calcium,<br>800IU vitamin D | New non-vertebral<br>fractures at 2 years                   | 14/152<br>(9.2%)  | 35/148<br>(23.6%) | p= 0.0026        | NR | NR   | Level<br>1 |
|                                                                      | Control:<br>58.0years                                                                             | Control:<br>Lumbar spine -3.29<br>Femoral neck -2.65<br>Total hip -2.59           |                                                                           | New non-vertebral<br>fractures at 1 year                    | 10/158<br>(6.3%)  | 17/158<br>(10.8%) | p = 0.227        | NR | NR   |            |
|                                                                      |                                                                                                   |                                                                                   |                                                                           | New non-vertebral<br>fractures at 2 years                   | 18/152<br>(11.8%) | 33/148<br>(22.3%) | p = 0.032        | NR | NR   |            |
| <b>Watts et al., 2009(7)</b><br><b>USA</b><br><br><b>N = 1216</b>    | Mean age<br>range across<br>groups<br>stratified by<br>BMD change:<br>68.0 –<br>70.0years<br>100% | Mean lumbar spine across<br>groups stratified by BMD<br>change:<br>-2.27 to -2.68 | Teriparatide<br>20 or 40µg/d                                              | New vertebral/ non-<br>vertebral fracture:<br>BMD loss 0-4% | 5/182<br>(2.7%)   | 15/149<br>(10.0%) | 0.27 (0.10-0.73) | NR | 7.4  | Level<br>1 |
|                                                                      |                                                                                                   | Mean femoral neck across<br>groups stratified by BMD<br>change:<br>-2.21 to -2.54 |                                                                           | New vertebral/ non-<br>vertebral fracture:<br>BMD loss >4%  | 2/82<br>(2.4%)    | 14/61<br>(23.0%)  | 0.11 (0.03-.45)  | NR | 20.6 |            |
|                                                                      |                                                                                                   |                                                                                   |                                                                           | New vertebral/ non-<br>vertebral fracture:<br>BMD gain 0-4% | 16/270<br>(5.9%)  | 19/124<br>(15.3%) | 0.39 (0.21-0.73) | NR | 9.4  |            |
|                                                                      |                                                                                                   |                                                                                   |                                                                           | New vertebral/ non-<br>vertebral fracture:<br>BMD gain >4%  | 14/282<br>(5.0%)  | 9/66<br>(13.6%)   | 0.36 (0.16-0.80) | NR | 8.6  |            |

HRT = Hormone Replacement Therapy

\*This study also provided data on fracture incidence rates per 1000 person years for non-vertebral fractures (HR, 0.96; 95% CI, 0.84–1.10), hip/femur fractures (HR, 0.85; 95% CI, 0.64–1.13) and wrist fractures (HR, 0.95; 95% CI, 0.73–1.24).

\*\*Stratified by eGFR: <45ml/minute and ≥ 45ml/minute.

## REFERENCES

- (1) Bouxsein ML, Chen P, Glass EV, Kallmes DF, Delmas PD, Mitlak BH. Teriparatide and raloxifene reduce the risk of new adjacent vertebral fractures in postmenopausal women with osteoporosis. Results from two randomized controlled trials. *Journal of Bone and Joint Surgery* 2009; 91:1329-1338.
- (2) Campbell IA, Francis RM, Prescott RJ, Reid DM. Hormone replacement therapy (HRT) or etidronate for osteoporosis in postmenopausal asthmatics on glucocorticoids: A randomized factorial trial. *Scottish Medical Journal* 2009; 54(1):21-25.
- (3) Cummings SR, Martin SJ, McClung MR, Siris ES, Eastell R, Reid IR et al. Denosumab for prevention of fractures in postmenopausal women with osteoporosis. *N Engl J Med* 2009; 361:756-765.
- (4) Ensrud KE, Stock JL, Barrett-Connor E, Grady D, Mosca L, Khaw KT et al. Effects of raloxifene on fracture risk in postmenopausal women: the raloxifene use for the heart trial. *J Bone Miner Res* 2008; 23(1):112-120.
- (5) Jamal SA, Bauer DC, Ensrud KC, Cauley JA, Hochberg M, Ishani A et al. Alendronate treatment in women with normal to severely impaired renal function: an analysis of the Fracture Intervention Trial. *J Bone Miner Res* 2007; 22(4):503-508.

- (6) Ringe JD, Farahmand P, Faber H, Dorst A. Sustained efficacy of risedronate in men with primary and secondary osteoporosis: results of a 2-year study. *Rheumatology International* 2009; 29:311-315.
- (7) Watts NB, Miller PD, Kohlmeier LA, Sebban A, Chen P, Wong M et al. Vertebral fracture risk is reduced in women who lose femoral neck BMD with teriparatide treatment. *J Bone Miner Res* 2009; 24(6):1125-1131.

## Evidence of Systematic Reviews on Therapies

| Study (Population) Inclusion Criteria                                                                                                                                                                                                                                                                                     | Intervention                                                    | Outcomes (# of studies, participants)                                  | Results Risk Ratio (M-H, Fixed, 95% CI) | Number Needed to Treat (NNT) | Absolute Risk Reduction (ARR) | Level of Evidence                                     |
|---------------------------------------------------------------------------------------------------------------------------------------------------------------------------------------------------------------------------------------------------------------------------------------------------------------------------|-----------------------------------------------------------------|------------------------------------------------------------------------|-----------------------------------------|------------------------------|-------------------------------|-------------------------------------------------------|
| <b>Bischoff-Ferrari et al., 2009(1)</b><br><b>(Older individuals ≥65years)</b><br><br>Double blinded RCTs, oral vitamin D supplementation (cholecalciferol [vitaminD3] or ergocalciferol); min 1 year follow-up of 1 year; > 1 fracture in each trial; age ≥ 65 years; adherence report, method of fracture confirmation. | Supplemental vitamin D, with or without calcium supplementation | any dose of vitamin D preventing non-vertebral fracture (12, N= 41279) | RR=0.86 (0.77-0.96)                     | NR                           | NR                            | Level 2+                                              |
|                                                                                                                                                                                                                                                                                                                           | Placebo or calcium supplementation alone                        | Any dose of vitamin D preventing hip fractures (8, N = 40886)          | RR=0.91 (0.78-1.05).                    | NR                           | NR                            |                                                       |
| <b>NICE 2008(2)</b><br>(Men and women at risk for osteoporotic fracture: with osteoporosis or osteopenia; osteoporosis defined as t-score ≤ -2.5SD; corticosteroid induced osteoporosis included)                                                                                                                         | Zoledronic Acid 5mg                                             | Vertebral (2, N = 7802)                                                | 0.33 (0.27, 0.4) significant            | 13                           | NR                            | Level 2+ (included RCTs and quasi-randomized studies) |
|                                                                                                                                                                                                                                                                                                                           |                                                                 | Vertebral fracture: clinical (1, N = 7736)                             | 0.23 (0.14, 0.37) significant           | 50                           | NR                            |                                                       |
|                                                                                                                                                                                                                                                                                                                           |                                                                 | Nonvertebral Fracture (2, N = 9868)                                    | 0.75 (0.66, 0.85) Significant           | 50                           | NR                            |                                                       |
|                                                                                                                                                                                                                                                                                                                           |                                                                 | Hip (2, N = 9868)                                                      | 0.62 (0.47, 0.83) significant           | 100                          | NR                            |                                                       |
| RCTs, quasi-randomized only in absence of other evidence, English language except those translated for Cochrane reviews, study N> 10.                                                                                                                                                                                     | Alendronate vs placebo/no treatment                             | Vertebral fracture (9, N = 8074)                                       | 0.55(0.46, 0.66) significant            | 33                           | NR                            | Level 2+                                              |
|                                                                                                                                                                                                                                                                                                                           |                                                                 | Nonvertebral Fracture (8, N = 10429)                                   | 0.83 (0.74, 0.93) significant           | 50                           | NR                            |                                                       |
|                                                                                                                                                                                                                                                                                                                           |                                                                 | Hip Fracture (3, N = 7453)                                             | 0.62 (0.4, 0.96) Significant            | 100                          | NR                            |                                                       |
|                                                                                                                                                                                                                                                                                                                           |                                                                 | Wrist (3, N = 7453)                                                    | 0.85 (0.67, 1.09) Significant           | NR                           | NR                            |                                                       |
|                                                                                                                                                                                                                                                                                                                           | Etidronate vs placebo/no treatment                              | Vertebral fracture (8, N = 1039)                                       | 0.51 (0.31, 0.83) Significant           | 25                           | NR                            | Level 2+                                              |
|                                                                                                                                                                                                                                                                                                                           |                                                                 | Nonvertebral fracture (4, N = 472)                                     | 0.72 (0.29, 1.8) NS                     | NR                           | NR                            |                                                       |
|                                                                                                                                                                                                                                                                                                                           |                                                                 | Hip Fracture (2, N= 246)                                               | 1.02 (0.21, 4.94) NS                    | NR                           | NR                            |                                                       |

|  |                             |                                                                |                               |          |    |          |
|--|-----------------------------|----------------------------------------------------------------|-------------------------------|----------|----|----------|
|  |                             | Wrist (1, N = 209)                                             | 4.95 (0.24, 101.93) ns        | NR       | NR |          |
|  |                             | All fractures (4, N = 420)                                     | 0.78 (0.42, 1.44)             | NR       | NR |          |
|  | Risedronate vs placebo      | Vertebral Fracture (7, N = 2845)                               | 0.61 (0.5, 0.74) significant  | 17       | NR | Level 2+ |
|  |                             | Nonvertebral Fracture (7, N = 2845)                            | 0.81 (0.72, 0.9) significant  | 50       | NR |          |
|  |                             | Hip fracture (7, N = 12658)                                    | 0.73 (0.58, 0.92) Significant | 100      | NR |          |
|  |                             | Wrist Fracture (4, N = 11923)                                  | 0.68 (0.43, 1.07) NS          | NR       | NR |          |
|  |                             | Humerus (2, N = 2439)                                          | 0.46 (0.23, 0.93) Significant | 100      | NR |          |
|  | Teriparatide vs placebo     | Vertebral (2, N = 910)                                         | 0.36 (0.23, 0.57) Significant | 11       | NR | Level 2+ |
|  |                             | Nonvertebral (2, N = 1383 )                                    | 0.49 (0.27, 0.87) Significant | 50       | NR |          |
|  |                             | Hip (1, N = 1085)                                              | 0.25 (0.03, 2.24) NS          | NR       | NR |          |
|  |                             | Wrist (1, N = 1085)                                            | 0.29 (0.06, 1.38) NS          | NR       | NR |          |
|  |                             | Humerus (1, N = 1085)                                          | 1.01 (0.14, 7.11) NS          | NR       | NR |          |
|  | Calcitonin vs placebo       | Vertebral (4, N = 11842)                                       | 0.65 (0.48, 0.88) Significant | 13       | NR | Level 2+ |
|  |                             | Hip (3, N = 11774)                                             | 0.54 (0.18, 1.59) NS          | NR       | NR |          |
|  |                             | Arm: all fractures wrist, ulna, humerus, radius (2, N = 11745) | 0.79 (0.38, 1.61) NS          | NR       | NR |          |
|  | HRT vs placebo/no treatment | Vertebral (4, N = 11842)                                       | 0.67 (0.48, 0.93) Significant | 100      | NR | Level 2+ |
|  |                             | Nonvertebral (3, N = 1174)                                     | 0.73(0.65, 0.81) Significant  | 33       | NR |          |
|  |                             | Hip (2, N = 11745)                                             | 0.63 (0.42, 0.93) Significant | Infinity | NR |          |
|  |                             | All fractures (3, N = 11556)                                   | 0.7 (0.63, 0.78) Significant  | 25       | NR |          |

|  |                                                     |                                       |                                  |    |    |          |
|--|-----------------------------------------------------|---------------------------------------|----------------------------------|----|----|----------|
|  | Raloxifene vs placebo                               | Vertebral (2, N = 4639)               | 0.64 (0.54, 0.78)<br>Significant | 25 | NR | Level 2+ |
|  |                                                     | Nonvertebral (2, N = 7793)            | 0.91 (0.78, 1.05)<br>NS          | NR | NR |          |
|  |                                                     | Hip (2, N = 7793)                     | 1.12 (0.64, 1.94)<br>NS          | NR | NR |          |
|  |                                                     | Wrist (1, N = 7705)                   | 0.88 (0.68, 1.14)<br>NS          | NR | NR |          |
|  | Hydroxylated vitamin D vs placebo                   | Vertebral (1, N = 246)                | 4 (0.45, 35.28)<br>NS            | NR | NR | Level 2+ |
|  |                                                     | Nonvertebral (1, N = 246)             | 0.46 (CI 0.18, 1.18)<br>NS       | NR | NR |          |
|  | Native vitamin D† vs placebo/no treatment           | Vertebral (3, N = 8801)               | 0.66 (0.4, 1.08)<br>NS           | NR | NR | Level 2+ |
|  |                                                     | Nonvertebral (8, N = 22098)           | 1.01 (0.94, 1.1)<br>NS           | NR | NR |          |
|  |                                                     | Hip (8, N = 22098)                    | 1.14 (0.98, 1.32)<br>NS          | NR | NR |          |
|  | Native vitamin D† + calcium vs placebo/no treatment | All clinical fractures (1, N = 3314)  | 0.96 (0.7, 1.33)<br>NS           | NR | NR | Level 2+ |
|  |                                                     | All clinical fractures (1, N = 5063)  | 0.96 (0.78, 1.18)<br>NS          | NR | NR |          |
|  | Calcium vs placebo                                  | Vertebral (7, N = 6013)               | 0.84 (0.66, 1.08)<br>NS          | NR | NR | Level 2+ |
|  |                                                     | Nonvertebral (5, N = 5717)            | 0.92 (0.79, 1.05)<br>NS          | NR | NR |          |
|  |                                                     | Wrist (2, N = 4160)                   | 1.05 (0.57, 1.92)<br>NS          | NR | NR |          |
|  |                                                     | Distal forearm fracture (1, N = 1471) | 0.64 (0.4, 1.02)<br>NS           | NR | NR |          |
|  |                                                     | Upper Limb (2, N = 4103)              | 1.06 (0.75, 1.5)<br>NS           | NR | NR |          |
|  |                                                     | All fractures (1, N = 5574)           | 0.9 (0.79, 1.03)<br>NS           | NR | NR |          |

|                                                                                                                                                                                  |                                                |                                                                                                                                                             |                                               |                                                                                               |                           |          |
|----------------------------------------------------------------------------------------------------------------------------------------------------------------------------------|------------------------------------------------|-------------------------------------------------------------------------------------------------------------------------------------------------------------|-----------------------------------------------|-----------------------------------------------------------------------------------------------|---------------------------|----------|
| <b>Wells et al., 2008(3)</b><br>(Post-menopausal women)<br>Published RCTs, duration minimum 1 year,<br>Alendronate compared with no treatment, outcome:<br>incidence of fracture | <b>Alendronate vs placebo/no<br/>treatment</b> | <b>Overall Weighted RR:</b><br>Vertebral Fractures (4,<br>TxN=3486, NoTxN=3670)                                                                             | .55 (0.45; .067)<br>p<..0001                  | NR                                                                                            | NR                        | Level 1+ |
|                                                                                                                                                                                  |                                                | Non-Vertebral Fractures<br>(5, TxN=4843, NoTxN=4638)                                                                                                        | .84 (0.74; .094)<br>p=.002                    | NR                                                                                            | NR                        |          |
|                                                                                                                                                                                  |                                                | Hip Fractures<br>(6, TxN=5005, NoTxN=4802)                                                                                                                  | .61 (0.40; .092)<br>p=.02                     | NR                                                                                            | NR                        |          |
|                                                                                                                                                                                  |                                                | Wrist Fractures<br>(5, (TxN=4843, NoTxN=2218)                                                                                                               | .68 (0.34; 1.37)<br>p=.28                     | NR                                                                                            | NR                        |          |
|                                                                                                                                                                                  |                                                | <b>Primary Prevention:</b><br>Vertebral Fractures<br>(1, TxN=2214, NoTxN=2218)                                                                              | .55 (0.38; .080)<br>p<.002                    | 66*<br>186**<br>42***                                                                         | 2%                        |          |
|                                                                                                                                                                                  |                                                | Non-Vertebral Fractures<br>(1, TxN=2214, NoTxN=2218)                                                                                                        | .89 (0.76; 1.04)<br>p=.14                     | NR                                                                                            | NR                        |          |
|                                                                                                                                                                                  |                                                | Hip Fractures<br>(1, TxN=2214, NoTxN=2218)                                                                                                                  | .79 (0.44; 1.44)<br>p=.04                     | NR                                                                                            | NR                        |          |
|                                                                                                                                                                                  |                                                | Wrist Fractures<br>(1 TxN=2214, NoTxN=2218)                                                                                                                 | 1.19(0.87; 1.62)<br>p=.28                     | NR                                                                                            | NR                        |          |
|                                                                                                                                                                                  |                                                | <b>Secondary Prevention:</b><br>Vertebral Fractures<br>(3, TxN=1274, NoTxN=1452)                                                                            | .55 (0.43; .069)<br>p<.0001                   | 19*<br>42**<br>20***                                                                          | 6%                        |          |
|                                                                                                                                                                                  |                                                | Non-Vertebral Fractures<br>(4, TxN=2629, NoTxN=2420)                                                                                                        | .77 (0.64; .092)<br>p=.005                    | 47*<br>27***<br>16****                                                                        | 2%                        |          |
|                                                                                                                                                                                  |                                                | Hip Fractures<br>(5, TxN=2792, NoTxN=2584)                                                                                                                  | .47 (0.26; .85)<br>p=.01                      | 146*<br>100***<br>22****                                                                      | 1%                        |          |
|                                                                                                                                                                                  |                                                | Wrist Fractures<br>(4, TxN=2629, NoTxN=2420)                                                                                                                | .50(0.34; 1.73)<br>p=.003                     | NR                                                                                            | NR                        |          |
|                                                                                                                                                                                  |                                                | <b>Wells et al., 2008(4)</b><br>(Postmenopausal women)<br>RCTs duration minimum 1 year, postmenopausal<br>women only, primary & secondary prevention trials | <b>Etidronate vs placebo/no<br/>treatment</b> | <b>Overall Weighted RR</b><br><b>400mg:</b><br>Vertebral Fractures<br>(8, TxN=430, NoTxN=428) | .59 (0.36; .096)<br>p=.03 | NR       |
| Non-Vertebral Fractures<br>(7, TxN=393, NoTxN=394)                                                                                                                               | .98 (0.68; 1.42)<br>p=.9                       |                                                                                                                                                             |                                               | NR                                                                                            | NR                        |          |
| Hip Fractures<br>(4, TxN=295, NoTxN=294)                                                                                                                                         | 1.2 (0.37; 3.88)<br>p=.8                       |                                                                                                                                                             |                                               | NR                                                                                            | NR                        |          |



|                                                                                      |                        |                                                                                      |                              |                        |    |          |
|--------------------------------------------------------------------------------------|------------------------|--------------------------------------------------------------------------------------|------------------------------|------------------------|----|----------|
|                                                                                      |                        | Wrist Fractures<br>(4, TxN=295, NoTxN=294)                                           | .87 (0.32; 2.36)<br>p=.8     | NR                     | NR |          |
|                                                                                      |                        | <b>Primary Prevention 400mg:</b><br>Vertebral Fractures<br>(2, TxN=81, NoTxN=82)     | 3.03(0.32; 28.44)<br>p=.3    | NR                     | NR |          |
|                                                                                      |                        | Non-Vertebral Fractures<br>(2, TxN=81, NoTxN=82)                                     | .56 (0.20; 1.61)<br>p=.3     | NR                     | NR |          |
|                                                                                      |                        | Hip Fractures<br>(0, N/A)                                                            | N/A                          | NR                     | NR |          |
|                                                                                      |                        | Wrist Fractures<br>(0, N/A)                                                          | N/A                          | NR                     | NR |          |
|                                                                                      |                        | <b>Secondary Prevention 400mg:</b><br>Vertebral Fractures<br>(6, TxN=349, NoTxN=346) | .53 (0.32; .087)<br>p=.01    | 20*<br>41***<br>19**** | 5% |          |
|                                                                                      |                        | Non-Vertebral Fractures<br>(5, TxN=312, NoTxN=312)                                   | 1.07(0.72; 1.60)<br>p=.7     | NR                     | NR |          |
|                                                                                      |                        | Hip Fractures<br>(4, TxN=295, NoTxN=294)                                             | 1.20(0.37; 3.88)<br>p=.8     | NR                     | NR |          |
|                                                                                      |                        | Wrist Fractures<br>(4, TxN=295, NoTxN=294)                                           | .87(0.32; 2.36)<br>p=.8      | NR                     | NR |          |
|                                                                                      |                        | <b>Secondary Prevention 200mg:</b><br>Vertebral Fractures<br>(2, N = 172)            | 0.32, (0.16; 0.64)<br>p<.05  | NR                     | NR |          |
|                                                                                      |                        | Hip Fractures<br>(1, N = 132)                                                        | 0.33, (0.01; 8.04)<br>p=NS   | NR                     | NR |          |
|                                                                                      |                        | Wrist Fractures<br>(1, N = 132)                                                      | 0.06(.05; 5.38)<br>p=NS      | NR                     | NR |          |
| Wells et al., 2008(5)                                                                | Risedronate vs placebo | Vertebral (overall) (4, TxN=1534, NoTxN=1532)                                        | 0.63 (0.51-0.77)<br>p<0.0001 | NR                     | NR | Level 1+ |
| (Postmenopausal women)<br>RCTs duration minimum 1 year, primary and secondary trials |                        | Vertebral (primary) (2, TxN=166, NoTxN=161)                                          | 0.97 (0.42-2.25)<br>p=0.94   | NR                     | NR |          |
|                                                                                      |                        | Vertebral (secondary) (3, TxN=1405, NoTxN=1407)                                      | 0.61 (0.50-0.76)<br>p<0.0001 | 19*<br>49***<br>23**** | 5% |          |
|                                                                                      |                        | Non-Vertebral (overall) (5, TxN=7731, NoTxN=4666)                                    | 0.80 (0.72-0.90)<br>p=0.0002 | NR                     | NR |          |

|  |  |                                                     |                              |                         |    |  |
|--|--|-----------------------------------------------------|------------------------------|-------------------------|----|--|
|  |  | Non-Vertebral (primary) (1, TxN=129, NoTxN=125)     | 0.81 (0.25-2.58)<br>p=0.72   | NR                      | NR |  |
|  |  | Non-Vertebral (secondary) (4, TxN=7602, NoTxN=4541) | 0.80 (0.72-0.90)<br>p<0.0002 | 49*<br>31***<br>19****  | 2% |  |
|  |  | Hip (overall) (3, TxN=7425, NoTxN=4361)             | 0.74 (0.59-0.94)<br>p=0.01   | NR                      | NR |  |
|  |  | Hip (primary) (1, TxN=37, NoTxN=36)                 | NE                           | NR                      | NR |  |
|  |  | Hip (secondary) (3, TxN=7425, NoTxN=4361)           | 0.74 (0.59-0.94)<br>p=0.01   | 138*<br>203**<br>45**** | 1% |  |
|  |  | Wrist (overall) (2, TxN=1265, NoTxN=1263)           | 0.67 (0.42-1.07)<br>p=0.10   | NR                      | NR |  |
|  |  | Wrist (primary) (1, TxN=37, NoTxN=36)               | NE                           | NR                      | NR |  |
|  |  | Wrist (secondary) (2, TxN=1228, NoTxN=1227)         | 0.67 (0.42-1.07)<br>p=0.10   | NR                      | NR |  |

Note: p value provided when reported.

\*Trial populations; \*\* Low Risk Women; \*\*\*Moderate Risk Women; \*\*\*\*High Risk Women

NR = Not Reported; NE = Not Estimable, TxN = Number of participants in treatment group; NoTxN: Number of participants in control group.

‡ Vit D3 (cholecalciferol) in 13 studies, Vitamin D2 (ergocalciferol) in 3 studies, Vit D (type not specified)

## REFERENCES

- (1) Bischoff-Ferrari HA, Willett WC, Wong JB, Stuck AE, Staehelin HB, Orav EJ et al. Prevention of nonvertebral fractures with oral vitamin D and dose dependency: a meta-analysis of randomized controlled trials. *Arch Intern Med* 2009; 169:551-561.
- (2) National Institute for Health and Clinical Excellence. Osteoporosis: assessment of fracture risk and the prevention of osteoporotic fracture in individuals at high risk. 2008. National Collaborating Centre for Nursing and Supportive Care. Ref Type: Report
- (3) Wells GA, Cranney A, Peterson J, Boucher M, Shea B, Robinson V et al. Alendronate for the primary and secondary prevention of osteoporotic fractures in postmenopausal women. *Cochrane Database Syst Rev* 2008;(1):CD001155.
- (4) Wells GA, Cranney A, Peterson J, Shea B, Welch V, Coyle D et al. Etidronate for the primary and secondary prevention of osteoporotic fractures in postmenopausal women. *Cochrane Database of Systematic Reviews* 2008;(1):CD003376.
- (5) Wells G, Cranney A, Peterson J, Boucher M, Shea B, Robinson V et al. Risedronate for the primary and secondary prevention of osteoporotic fractures in postmenopausal women. *Cochrane Database Syst Rev* 2008;(1):CD004523.

## Evidence of Randomized Controlled Trials on Special Populations

| Study<br>Country of Origin<br>Population<br>Total Number of Patients                                                                                                                                                                 | Age (yr, mean)/<br>% Female | Baseline mean<br>BMD(t-score or<br>g/cm <sup>2</sup> )<br>% Fractures                                                                                                                                                                    | Intervention<br>(dose) | Outcome                  | # Fractures/<br>total treated | # Fractures/<br>total control | Results<br>Risk Ratio<br>(95% CI)<br>p-value | Number<br>Needed to<br>Treat<br>(NNT) | Absolute Risk<br>Reduction<br>(ARR) | Level of<br>Evidence |
|--------------------------------------------------------------------------------------------------------------------------------------------------------------------------------------------------------------------------------------|-----------------------------|------------------------------------------------------------------------------------------------------------------------------------------------------------------------------------------------------------------------------------------|------------------------|--------------------------|-------------------------------|-------------------------------|----------------------------------------------|---------------------------------------|-------------------------------------|----------------------|
| <b>Smith et al.(1), 2009</b><br><br>Multicenter,<br>International (USA,<br>Canada, Mexico, Finland,<br>Czech Republic)<br><br>Men receiving<br>androgen-deprivation<br>therapy for<br>nonmetastatic prostate<br>cancer<br><br>N=1468 | Intervention:<br>75.3years  | Intervention: Lumbar spine, -0.3<br>Total hip -0.9<br>Femoral neck -1.4                                                                                                                                                                  | Denosumab 60mg         | New vertebral fractures  | 10/679<br>(1.5%)              | 26/673<br>(3.9%)              | 0.38 (0.19-0.78)<br>p=0.006                  | NR                                    | NR                                  | Level 1              |
|                                                                                                                                                                                                                                      | Control:<br>75.5years       | Vertebral fracture:<br>21.1%<br>History of<br>osteoporotic fracture:<br>22.2%<br><br>Control: Lumbar spine<br>-0.4<br>Total hip -0.9<br>Femoral neck -1.4<br>Vertebral fracture<br>23.7%<br>History of<br>osteoporotic fracture<br>26.7% |                        | New fracture at any site | 38/734<br>(5.2%)              | 53/734<br>(7.2%)              | 0.72 (0.48-1.07)<br>p=0.10                   | NR                                    | NR                                  |                      |

### Reference

(1) Smith MR, Egerdie B, Toriz NH, Feldman R, Tammela TLJ, Saad F et al. Denosumab in men receiving androgen-deprivation therapy for prostate cancer. *N Engl J Med* 2009; 361(8):745-755.

## Evidence of Randomized Controlled Trials or Observational Studies on Adverse Events

| Author (Year)<br>Country                                                                                                                                | Population<br>Gender<br>Mean Age yrs<br>Sample Size<br>% with Cancer                                                                                                                | Intervention/<br>Duration                                         | Outcomes: Type of<br>Adverse Event/<br>Definition/ Apriori<br>Definition/<br>Confirmation/<br>Blinded<br>adjudication                                                                                                                                                                              | Control group?<br>Y/N                                                                | Results (treatment vs<br>control findings: %/ N with<br>harm                                                                                                                                                                                                                                                                                                                                                                                                                                                                                  | Risk Ratio/ Hazard<br>Ratios (95% CI)<br>(p-values)                                                                                                                                                                        | Conclusions                                                                                                                                                             | Number<br>Needed to<br>Treat (NNT) | Absolute Risk<br>Reduction<br>(ARR) | Level of<br>Evidence                                      |
|---------------------------------------------------------------------------------------------------------------------------------------------------------|-------------------------------------------------------------------------------------------------------------------------------------------------------------------------------------|-------------------------------------------------------------------|----------------------------------------------------------------------------------------------------------------------------------------------------------------------------------------------------------------------------------------------------------------------------------------------------|--------------------------------------------------------------------------------------|-----------------------------------------------------------------------------------------------------------------------------------------------------------------------------------------------------------------------------------------------------------------------------------------------------------------------------------------------------------------------------------------------------------------------------------------------------------------------------------------------------------------------------------------------|----------------------------------------------------------------------------------------------------------------------------------------------------------------------------------------------------------------------------|-------------------------------------------------------------------------------------------------------------------------------------------------------------------------|------------------------------------|-------------------------------------|-----------------------------------------------------------|
| <b>Abrahamsen et al., 2009<br/>Denmark(1)</b><br><br><b>Retrospective cohort - national hospital discharge registry, national prescription database</b> | Patients >60yrs with fracture<br><br>Mean age alendronate exposed: 73.1 yrs; 9.8% male; N = 5187<br><br>Mean age matched controls: 73.1 yrs; 9.8% male; N = 10374<br><br>Cancer: NR | Alendronate (dose NR)<br><br>Duration: at least 6 months; >6years | Subtrochanteric fractures<br>Definition: NR<br>Confirmation: Classification of Diseases, Tenth Revision [ICD-10] codes for femoral neck (code S72.0) pertrochan-teric femur, (code S72.1), subtrochan-teric femur (code S72.2), and the femoral diaphysis (code S72.3)<br>Blinded adjudication: NR | Matched control: untreated cohort matched on age, sex, location of baseline fracture | At least 6 month duration:<br>Subtrochanteric fracture: alendronate exposed: .5% (24/ 5187)<br>matched control: .3% (27/10374)<br><br>Diaphyseal fracture: alendronate exposed: .3% (14/5187)<br>matched control: .1% (15/10374)<br><br>Subtrochanteric or Diaphyseal fracture: alendronate exposed: .7% (35/5187)<br>matched control: .4% (41/10374)<br><br>Hip fracture: alendronate exposed: 4.3% (221/5187)<br>matched control: 2.7% (285/10374)<br><br>>6 years duration:<br>Subtrochanteric fracture: alendronate exposed: 1.1% (2/178) | At least 6 month duration:<br>Subtrochanteric or Diaphyseal fracture HR = 1.64 (1.05–2.58) p<.05<br><br>Hip Fracture HR = 1.50 (1.26–1.79) p<.05<br><br>>6 years duration:<br>Hip fracture HR = 1.24, (0.66–2.34) p = 0.52 | Subtrochanteric/ diaphyseal femur fractures share the epidemiology and treatment response of classical hip fractures and are best classified as osteoporotic fractures. | NR                                 | NR                                  | Level 3 (Non-randomized controlled trial or cohort study) |

|                                                                                                               |                                                                                                                                                                                                                                                                                                 |                                                                                                                                                                                                                                                                                                |                                                                                                                                                                                                                                                                                                                                                                                                                          |                                                   |                                                                                                                                                                                                                                                                                                                                                                                                                                                               |                                                                                                                                                                                                                                                                                                                                                                                                                                                          |                                                                                                                                                                                                                                                    |    |    |                                                         |
|---------------------------------------------------------------------------------------------------------------|-------------------------------------------------------------------------------------------------------------------------------------------------------------------------------------------------------------------------------------------------------------------------------------------------|------------------------------------------------------------------------------------------------------------------------------------------------------------------------------------------------------------------------------------------------------------------------------------------------|--------------------------------------------------------------------------------------------------------------------------------------------------------------------------------------------------------------------------------------------------------------------------------------------------------------------------------------------------------------------------------------------------------------------------|---------------------------------------------------|---------------------------------------------------------------------------------------------------------------------------------------------------------------------------------------------------------------------------------------------------------------------------------------------------------------------------------------------------------------------------------------------------------------------------------------------------------------|----------------------------------------------------------------------------------------------------------------------------------------------------------------------------------------------------------------------------------------------------------------------------------------------------------------------------------------------------------------------------------------------------------------------------------------------------------|----------------------------------------------------------------------------------------------------------------------------------------------------------------------------------------------------------------------------------------------------|----|----|---------------------------------------------------------|
|                                                                                                               |                                                                                                                                                                                                                                                                                                 |                                                                                                                                                                                                                                                                                                |                                                                                                                                                                                                                                                                                                                                                                                                                          |                                                   | <p>matched control: .6% (2/356)<br/>Diaphyseal fracture: alendronate exposed: 0/178<br/>matched control: .3% (1/356)</p> <p>Subtrochantric or Diaphyseal fracture: alendronate exposed: 1.1% (2/178)<br/>matched control: .8% (3/356)</p> <p>Hip fracture: alendronate exposed: 10.1% (18/178)<br/>matched control: 5.9% (21/356)</p>                                                                                                                         |                                                                                                                                                                                                                                                                                                                                                                                                                                                          |                                                                                                                                                                                                                                                    |    |    |                                                         |
| <p><b>Bunch et al., 2009(2) USA</b></p> <p><b>Retrospective cohort – two prospective health databases</b></p> | <p>Patients who underwent coronary angiography<br/>Gender: NR<br/>Mean age BP use: 64.8yrs<br/>N = 9525<br/>Mean age no BP use: 59.2<br/>N= 98</p> <p>Patients in a health plan database<br/>Gender: NR<br/>Mean age BP use: 52.0yrs<br/>N = 7489<br/>Mean age no BP use: 51.1<br/>N= 29996</p> | <p>Any bisphosphonate including alendronate, ibandronate, zoledronic acid, zoledronic, risedronate, and etidronate.</p> <p>Duration: NR</p> <p>Coronary angiographic patients: average follow-up: 1,481 +/- 1024 days</p> <p>Health plan patients: average follow-up: 1667.5 +/- 557 years</p> | <p>Death: all-cause and coronary artery disease–related mortality:<br/>Classification of Diseases, Ninth Revision [ICD-9] codes (codes 410 to 414 or equivalent)<br/>Confirmation: death certificates, verification through Social Security death records.<br/>Apriori definition: Yes<br/>Blinded<br/>Adjudication: NR</p> <p>Myocardial infarction: NR<br/>Apriori definition: NR<br/>Blinded<br/>Adjudication: NR</p> | <p>No, Comparison Groups: BP use vs No BP use</p> | <p>Death:<br/>Coronary angiographic patients – BP use: 33% (32/98)</p> <p>Coronary angiographic patients – no BP use: 19% (1791/9525)</p> <p>Health plan patients - BP use: 2% (134/1789)</p> <p>Health plan patients – no BP use: 2% (606/29996)</p> <p>Myocardial infarction: Coronary angiographic patients – BP use: 10% (10/98)</p> <p>Coronary angiographic patients – no BP use: 8% (739/ 9525)</p> <p>Health plan patients - BP use: 1% (68/1789)</p> | <p>Death:<br/>Coronary angiographic patients: NR<br/>Health plan patients: HR 0.82 (0.68 to 0.99) p = 0.04</p> <p>Myocardial infarction: Coronary angiographic patients: HR NR<br/>Health plan patients: HR 0.73 (0.50 to 1.06) p = 0.10</p> <p>Atrial Fibrillation: Coronary angiographic patients: HR 0.90(0.48 to 1.68) p=.74.<br/>Health plan patients: HR 0.82(0.66 to 1.01) p=.63.</p> <p>Death: Coronary angiographic patients vs Health plan</p> | <p>Unable to find a link between bisphosphonate use and Atrial Fibrillation; There was an increased risk of mortality in with BP use but this group was older, had higher rates of hypertension and heart failure, and had a longer follow-up.</p> | NR | NR | Level 3 (Non-randomized clinical trial or cohort study) |

|                                                                                                                                       |                                                                                                                                                           |                                                                                                                                                                                                        |                                                                                                                                                                                                                                                                                                                                                                                       |                                                                               |                                                                                                                                                                                                                                                                                                                                   |                                                                                                                                                                                                                           |                                                                                                                                                |    |    |                                                         |
|---------------------------------------------------------------------------------------------------------------------------------------|-----------------------------------------------------------------------------------------------------------------------------------------------------------|--------------------------------------------------------------------------------------------------------------------------------------------------------------------------------------------------------|---------------------------------------------------------------------------------------------------------------------------------------------------------------------------------------------------------------------------------------------------------------------------------------------------------------------------------------------------------------------------------------|-------------------------------------------------------------------------------|-----------------------------------------------------------------------------------------------------------------------------------------------------------------------------------------------------------------------------------------------------------------------------------------------------------------------------------|---------------------------------------------------------------------------------------------------------------------------------------------------------------------------------------------------------------------------|------------------------------------------------------------------------------------------------------------------------------------------------|----|----|---------------------------------------------------------|
|                                                                                                                                       |                                                                                                                                                           |                                                                                                                                                                                                        | <p>Atrial Fibrillation: International Classification of Diseases, Ninth Revision [ICD-9] codes<br/>Confirmation: hospital electrocardiographic databases and physician review.<br/>Apriori definition: Yes<br/>Blinded<br/>Adjudication: NR</p>                                                                                                                                       |                                                                               | <p>Health plan patients – no BP use: 1% (343/ 29996)<br/><br/>Atrial Fibrillation: Coronary angiographic patients – BP use: 10% (10/98)<br/><br/>Coronary angiographic patients – no BP use: (10% 964/ 9525)<br/><br/>Health plan patients - BP use: 3% (220/1789)<br/><br/>Health plan patients – no BP use: 3% (792/ 29996)</p> | <p>patients: p&lt;0.0001<br/><br/>Myocardio infarction: Coronary angiographic patients vs Health plan patients: p= n.s.<br/><br/>Atrial fibrillation: Coronary angiographic patients vs Health plan patients: p= n.s.</p> |                                                                                                                                                |    |    |                                                         |
| <p><b>Cartsos et al. 2008(3) USA</b><br/><br/><b>Retrospective cohort – medical claims data. Codes of diagnosis or procedure.</b></p> | <p>People with OP or cancer<br/>89.9% female<br/>Age with OP: 59.9<br/>N = 714,217<br/>Cancer: 37.7% (269137/714,217)<br/>OP: 62.3% (445080/ 714,217)</p> | <p>Comparison (OP and Cancer) of Intravenous BP use (pamidronate and/or zoledronic acid) and PO BP use (alendro-nate, etidronate, ibandro-nate, risedro-nate or tiludronate)<br/><br/>Duration: NR</p> | <p>Inflammatory ONJ/ exposed necrotic bone persisting at least 8 weeks in those taking BPs<br/>Apriori Definition: Yes<br/>Confirmation: None; identified by International Classification of Diseases, ninth revision (ICD-9) code 526.4 describing inflammatory or necrotic processes in the mandible or maxilla<br/>Adjudication: NR<br/>LIMITATION: ICD-9 was used to ID cases</p> | <p>Comparison groups:<br/><br/>OP – no BP use<br/><br/>Cancer – no BP use</p> | <p>OP – IV BP: 0.48% (9/1858)<br/>OP - PO BP:0.08% (150/179870)<br/>OP – No BP use: 0.13% (339/263352)<br/>Ca – IV BP: 0.46% (39/8545)<br/>OP - PO BP: 0.12% (31/25039)<br/>Ca – No BP use: 0.11% (251/235553)</p>                                                                                                                | <p>OP – IV BP: Or crude = 4.01 (2.06–7.78) p&lt;0.05<br/>OP- PO BP: Or crude = 0.65 (0.54–0.79) p&lt;.05<br/><br/>Ca- IV BP: Or crude = 4.47 (3.19–6.27 )p&lt;.05<br/>Ca-PO BP: Or crude = 1.18 (0.81–1.72) p=ns</p>      | <p>Increased risk of inflammatory conditions and surgical procedures of the jaw for IV BP users, but did not see increases in PO BP users.</p> | NR | NR | Level 3 (Non-randomized clinical trial or cohort study) |

|                                                                                                                                                                                         |                                                                                                                                                                                                                                      |                                                                                                                                                                                                                       |                                                                                                                                                                                                                                                                                                                                                             |            |                                                                                                                                                                                                                                                                                                                                                                                                                                                                                                  |           |                                                                                                                                                                                                                                                                      |           |           |                                                                                  |
|-----------------------------------------------------------------------------------------------------------------------------------------------------------------------------------------|--------------------------------------------------------------------------------------------------------------------------------------------------------------------------------------------------------------------------------------|-----------------------------------------------------------------------------------------------------------------------------------------------------------------------------------------------------------------------|-------------------------------------------------------------------------------------------------------------------------------------------------------------------------------------------------------------------------------------------------------------------------------------------------------------------------------------------------------------|------------|--------------------------------------------------------------------------------------------------------------------------------------------------------------------------------------------------------------------------------------------------------------------------------------------------------------------------------------------------------------------------------------------------------------------------------------------------------------------------------------------------|-----------|----------------------------------------------------------------------------------------------------------------------------------------------------------------------------------------------------------------------------------------------------------------------|-----------|-----------|----------------------------------------------------------------------------------|
| <p><b>Grbic et al, 2008(4) USA RCT</b></p> <p><b>Prospective cohort, with control group -3 year int'l multi center, randomized, double blind, placebo controlled clinical trial</b></p> | <p>Postmenopausal women taking zoledronic acid<br/>100% Female,<br/>Age: 73.1<br/>N =7714<br/>n<sub>Zoledronic acid</sub> = 3875<br/>n<sub>placebo</sub> = 3861<br/>Cancer: NR</p>                                                   | <p>5mg zoledronic acid – once yearly IV over 15 minutes</p> <p>Duration: Up to three years</p>                                                                                                                        | <p>ONJ (not a primary endpoint)/ exposed bone in the maxillofacial area persisting more than 6 weeks despite appropriate management<br/>Apriori Definition: Yes<br/>Confirmation: independent adjudication by 5 dental experts (surgeons, pathologists, peridontist)<br/>Blinded adjudication: Yes- after search of trial database using 60 MedRA terms</p> | <p>Yes</p> | <p>No spontaneous reports of ONJ in either Treatment and Placebo<br/>Potential for Maxillofacial AE:<br/>Treatment = 2.6% (101/3675)<br/>Placebo = 3.3% (127/3861)<br/>ONJ (after blinded investigation by adjudication committee: number with a lesion that met the criteria for ONJ):<br/>Treatment = 0.03% (1/3675)<br/>Placebo: 0.03% (1/3861)<br/>&lt;1 in 10,000 patient years</p>                                                                                                         | <p>NR</p> | <p>ONJ is rare in postmenopausal women and delayed healing of lesions can occur with and without BP use over 3 years.</p>                                                                                                                                            | <p>NR</p> | <p>NR</p> | <p>Level 3 (Non-randomized clinical trial or cohort study)</p>                   |
| <p><b>Miller et al., 2007(5) Multicentre/ International (USA, Spain)</b></p> <p><b>Two prospective randomized double blind placebo controlled trials</b></p>                            | <p>Study 1: Postmenopausal women;<br/>100% Female<br/>Age: 69.5 (SD = 7.0; range = 42-86)<br/>M = 1637<br/>Cancer: 0<br/>(exclusion criteria)</p> <p>Study 2:<br/>100% Male<br/>Age: 58.7 (SD = 13.0; range = 28-65)<br/>N = 437</p> | <p>TPTD20 – single 20µg/d sc injection;<br/>(Calcium 1000mg, vitamin D 400-1200IU)<br/>TPTD40- single 40µg/d sc injection;<br/>(Calcium 1000mg, vitamin D 400-1200IU)</p> <p>Duration: Study 1: Median: 19 months</p> | <p>Hypercalciuria - urinary calcium excretion &gt;300mg/d (7.5 mmol/d); confirmed by 24-hr urinary collection lab testing<br/>Hypercalcemia - serum calcium &gt;10.6mg/dl (2.65mmol/liter) at 4-h after dose.<br/>Not defined or confirmed: Kidney calculus<br/>Urinary track calcifications</p>                                                            | <p>Yes</p> | <p>Number with adverse event:<br/>Both hypercalciuria and hypercalcemia: Study 1: TPTD20 = 0.57% (3/527); TPTD40 = NR but not significantly different from TPTD20. Placebo NR but noted as not significantly different from TPT20 or TPT40 interventions.<br/>Study 2: NR</p> <p>Hypercalciuria with normal serum calcium: Study 1: TPTD20 = 9.3% (49/527); TPTD40 = NR but not significantly different from TPTD20. Placebo NR but noted as not significantly different from TPT20 or TPT40</p> | <p>NR</p> | <p>Urinary calcium excretion was increased with TPTD treatment for up to 12 months, compared with placebo and baseline values, but the magnitude of these changes is unlikely to be clinically relevant or warrant urinary calcium monitoring for most patients.</p> | <p>NR</p> | <p>NR</p> | <p>Level 2 (randomized controlled trial that does not meet level 1 criteria)</p> |

|  |                                           |                                                                                                        |                                                                                                                 |                                                                                                                                                                                                                                                                                                                                                                                                                                                                                                                                                                                                                                                                                                                                                                                                                                                                                               |  |  |  |  |  |
|--|-------------------------------------------|--------------------------------------------------------------------------------------------------------|-----------------------------------------------------------------------------------------------------------------|-----------------------------------------------------------------------------------------------------------------------------------------------------------------------------------------------------------------------------------------------------------------------------------------------------------------------------------------------------------------------------------------------------------------------------------------------------------------------------------------------------------------------------------------------------------------------------------------------------------------------------------------------------------------------------------------------------------------------------------------------------------------------------------------------------------------------------------------------------------------------------------------------|--|--|--|--|--|
|  | <p>Cancer: 0<br/>(exclusion criteria)</p> | <p>(interquartile range: 17-21)<br/>Study 2:<br/>Median: 11 months<br/>(interquartile range: 9-12)</p> | <p>Kidney pain<br/>Possible urolithiasis<br/>Hematuria<br/>Apriori Definition:<br/>Yes<br/>Adjudication: NR</p> | <p>interventions.<br/>Study 2: NR</p> <p>Hypercalcemia with normal urinary calcium: Study 1: TPTD20 = 0.95% (5/527); TPTD40 = NR but not significantly different from TPTD20. Placebo NR. Study 2: NR</p> <p>Kidney Calculus: Study 1: TPTD20 = 0.38% (2/527); TPTD40 = NR; placebo = 0.37% (2/536). Study 2: TPTD20 = 1.4% (2/145); TPTD40 = 0.76% (1/132); placebo = 0.71% (1/141).</p> <p>Urinary Tract calcifications: Study 1: TPTD20 = 0.19% (1/527); TPTD40 = 0.18% (1/541); Placebo NR. Study 2: NR.</p> <p>Kidney pain: Study 1: TPTD20 = 0.57% (3/527); TPTD40 = 0.18% (1/541); placebo = NR. Study 2: TPTD20 = NR; TPTD40= 0.76% (1/132)</p> <p>Possible urolithiasis: Study 1: TPTD20 = .11% (6/527); TPTD40 = .37% (2/541); Placebo NR. Study 2: 1.2% (5/418)</p> <p>Hematuria: Study 1: TPTD20 = 0.76% (4/527); TPTD40 = 0.74% (4/541), Placebo: 1.1% (6/536); Study 2: NR.</p> |  |  |  |  |  |
|--|-------------------------------------------|--------------------------------------------------------------------------------------------------------|-----------------------------------------------------------------------------------------------------------------|-----------------------------------------------------------------------------------------------------------------------------------------------------------------------------------------------------------------------------------------------------------------------------------------------------------------------------------------------------------------------------------------------------------------------------------------------------------------------------------------------------------------------------------------------------------------------------------------------------------------------------------------------------------------------------------------------------------------------------------------------------------------------------------------------------------------------------------------------------------------------------------------------|--|--|--|--|--|



|                                                                                                    |                                                                                                                                                                                                                   |                                                               |                                                                                                                                                                                                                                                                                                                                                                                                                                                                                                                                                                                                                                                                                           |            |                                                                                                                                                                                                                                                    |                                                                                                                                                              |                                                                                                                                                                                   |           |                                         |                                          |
|----------------------------------------------------------------------------------------------------|-------------------------------------------------------------------------------------------------------------------------------------------------------------------------------------------------------------------|---------------------------------------------------------------|-------------------------------------------------------------------------------------------------------------------------------------------------------------------------------------------------------------------------------------------------------------------------------------------------------------------------------------------------------------------------------------------------------------------------------------------------------------------------------------------------------------------------------------------------------------------------------------------------------------------------------------------------------------------------------------------|------------|----------------------------------------------------------------------------------------------------------------------------------------------------------------------------------------------------------------------------------------------------|--------------------------------------------------------------------------------------------------------------------------------------------------------------|-----------------------------------------------------------------------------------------------------------------------------------------------------------------------------------|-----------|-----------------------------------------|------------------------------------------|
| <p><b>Mosca et al., 2009(6)</b><br/> <b>Multicentre/ International (USA, United Kingdom, )</b></p> | <p>Post menopausal women with or at increased risk of coronary heart disease<br/> Mean age: 67.5years<br/> N = 10101<br/> n<sub>raloxifene</sub> = 5044<br/> n<sub>placebo</sub> = 5057<br/> <br/> Cancer: NR</p> | <p>Raloxifene, oral, 60mg per day<br/> <br/> Duration: NR</p> | <p>Venous thromboembolism (VTE): deep vein thrombosis, pulmonary embolism, and intracranial thrombosis (ie, retinal vein thrombosis); WHO criteria.<br/> Confirmation: Doppler study or venogram findings. Cerebrovascular accident/stroke: rapid onset of a persistent neurological deficit attributed to an obstruction in cerebral blood flow and/or cerebral hemorrhage not due to trauma, tumor, infection, or other certain etiology; lasting more than 24 hr unless death occurred or there was a demonstrable lesion compatible with an acute stroke on imaging.<br/> Confirmation: Imaging/ Stroke End Point Committee adjudication.<br/> Death (noncoronary cardiovascular,</p> | <p>Yes</p> | <p>VTE:<br/> Raloxifene: 0.02% (103/5044)<br/> Placebo: 0.01% (71/5057)<br/> <br/> Stroke:<br/> Raloxifene: 0.05% (249/5044)<br/> Placebo: 0.04% (224/5057)<br/> <br/> Death:<br/> Raloxifene: 0.11% (554/5044)<br/> Placebo: 0.12% (595/5057)</p> | <p>VTE HR:<br/> 1.44 (1.06–1.95)<br/> p=.02<br/> <br/> Stroke HR:<br/> 1.10 (0.92–1.32)<br/> p=.30<br/> <br/> Death HR:<br/> 0.92 (0.82–1.03)<br/> p=.16</p> | <p>Postmenopausal women at increased risk for coronary events taking raloxifene had higher incidences of venous thromboembolism and fatal stroke than those in placebo group.</p> | <p>NR</p> | <p>VTE:<br/> ARI=0.12 per 100 women</p> | <p>Level 1 (RCT with adequate power)</p> |
|----------------------------------------------------------------------------------------------------|-------------------------------------------------------------------------------------------------------------------------------------------------------------------------------------------------------------------|---------------------------------------------------------------|-------------------------------------------------------------------------------------------------------------------------------------------------------------------------------------------------------------------------------------------------------------------------------------------------------------------------------------------------------------------------------------------------------------------------------------------------------------------------------------------------------------------------------------------------------------------------------------------------------------------------------------------------------------------------------------------|------------|----------------------------------------------------------------------------------------------------------------------------------------------------------------------------------------------------------------------------------------------------|--------------------------------------------------------------------------------------------------------------------------------------------------------------|-----------------------------------------------------------------------------------------------------------------------------------------------------------------------------------|-----------|-----------------------------------------|------------------------------------------|

|  |  |  |                                                                                                                                                                                                                             |  |  |  |  |  |  |  |
|--|--|--|-----------------------------------------------------------------------------------------------------------------------------------------------------------------------------------------------------------------------------|--|--|--|--|--|--|--|
|  |  |  | <p>including cerebrovascular cause or venous thromboembolism<br/>Confirmation: available clinical information, death certificate, and/or autopsy information.<br/>Apriori Definition: Yes<br/>Blinded adjudication: Yes</p> |  |  |  |  |  |  |  |
|--|--|--|-----------------------------------------------------------------------------------------------------------------------------------------------------------------------------------------------------------------------------|--|--|--|--|--|--|--|

BP = Bisphosphonate; ONJ = osteonecrosis of the jaw; OP = Osteoporosis; Ca = Cancer; NR = Not reported; PO = orally

**REFERENCES**

- (1) Abrahamsen B, Eiken P, Eastell R. Subtrochanteric and diaphyseal femur fractures in patients treated with alendronate: A register-based national cohort study. *Journal of Bone & Mineral Research* 2009; 24(1095):1102.
- (2) Bunch TJ, Anderson JL, May HT, Muhlestein JB, Horne BD, Crandall BG et al. Relation of bisphosphonate therapies and risk of developing atrial fibrillation. *American Journal of Cardiology* 2009; 103:824-828.
- (3) Cartsos VM, Zhu S, Zavras AI. Bisphosphonate use and the risk of adverse jaw outcomes: a medical claims study of 714,217 people. *Journal of the American Dental Association* 2008; 139:23-30.
- (4) Grbic JT, Landesberg R, Lin SQ, Mesenbrink P, Reid IR, Leung PC et al. Health Outcomes and Reduced Incidence with Zoledronic Acid Once Yearly Pivotal Fracture Trial Research Group. *Journal of the American Dental Association* 2008; 139:32-40.
- (5) Miller PD, Bilezikian JP, Diaz-Curiel M, Chen P, Marin F, Krege JH et al. Occurrence of hypercalciuria in patients with osteoporosis treated with teriparatide. *The Journal of Clinical Endocrinology & Metabolism* 2007; 92(9):3535-3541.
- (6) Mosca L, Grady D, Barrett-Connor E, Collins P, Wenger N, Abramson BL et al. Effect of raloxifene on stroke and venous thromboembolism according to subgroups in postmenopausal women at increased risk of coronary heart disease. *Stroke* 2009; 40:147-155.

## Evidence of Systematic Reviews on Adverse Events

| Author Year Country                | Eligibility criteria                                                                                                                                                                                                                                | Intervention; number of RCTs (n) or observational studies                                                                                                                                                                             | Harm/ Definition/ Confirmation/ A priori definition                                                                                                                                                                                             | Outcomes (type of harm) N with adverse events                                                                                                                                                                                                                                                                                                                                                                                  | Risk Ratio/ Hazard Ratios (p-values) | Conclusions                                                                                                                                                                                                                                                                                                                     | Number Needed to Treat (NNT) | Absolute Risk Reduction (ARR) | Level of Evidence                                                             |
|------------------------------------|-----------------------------------------------------------------------------------------------------------------------------------------------------------------------------------------------------------------------------------------------------|---------------------------------------------------------------------------------------------------------------------------------------------------------------------------------------------------------------------------------------|-------------------------------------------------------------------------------------------------------------------------------------------------------------------------------------------------------------------------------------------------|--------------------------------------------------------------------------------------------------------------------------------------------------------------------------------------------------------------------------------------------------------------------------------------------------------------------------------------------------------------------------------------------------------------------------------|--------------------------------------|---------------------------------------------------------------------------------------------------------------------------------------------------------------------------------------------------------------------------------------------------------------------------------------------------------------------------------|------------------------------|-------------------------------|-------------------------------------------------------------------------------|
| <b>Heaney et al. 2008(1) USA</b>   | Inclusion criteria – not specified; Excluded studies of treatment agents and disease conditions that may alter kidney stone risk (e.g., teriparatide, glucocorticoid-induced osteoporosis) and studies in men (as risk of stones is higher in men). | Calcium supplementation (at various doses from 500-1000mg/d)<br><br>Observational studies: N= 6<br>Bone active agent registration trials: N= 4<br>Calcium supplement trials: N= 12<br>Unpublished Woman’s Health Initiative data: N=3 | Kidney Stones/ Not defined as stones were not a primary endpoint in of the studies reviewed.<br><br>Registration trials: queried kidney stones, nephrolithiasis, renal calculi and similar terms.<br>Confirmation: NR<br>Apriori definition: NR | Registration trials: Active agent 0.50% (70/14,598); Placebo: 0.35% (37/10697)<br>RCTs: Ca aggregate: 0.18% (10/5513); Placebo aggregate: 0.17% (8/4706)<br>FROM WHI Studies: Calcium study: 2.5% (449/18176); Placebo: 2.1% (381/18106)<br>WHI Observation Study: 2.5% (2327/91676)<br>WHI Clinical trials: 2.8% (1877/68132)<br>Observational Studies: Stone occurrence ranges from 36.0 -191.3 /100,000/yr across 6 studies | Not reported                         | Most of the studies show no increase in stone risk with high calcium intake (from either diet or supplements).<br><br>Contrariwise there is a substantial body of evidence, both from controlled trials and from observational studies, indicating that there is an inverse relationship between calcium intake and stone risk. | NR                           | NR                            | Level 2+ but it’s not clear b/c they did not include their inclusion criteria |
| <b>Pazianas et al. 2007(2) USA</b> | Population: adult (age >18 years) male and/or female patients with ONJ; patients received bisphosphonates for the treatment of OP only;                                                                                                             | 11 studies reporting 26 cases of ONJ<br><br>Treatment: 88% (23/26) patients received alendronate, and 4% (1/26)                                                                                                                       | ONJ Definition: presense of non-healing exposed necrotic bone in the maxillofacial region with BP use for the treatment of osteoporosis.<br>Confirmation: NR                                                                                    | ONJ: Retrospective study (3 studies): N = 12<br><br>Case Report (5 studies): N = 5<br><br>Case Series (3 studies): N = 9                                                                                                                                                                                                                                                                                                       | NR                                   | ONJ in patients on BP’s was low. Common characteristics of those who develop ONJ = >60 yrs, female, previous invasive dental treatment. Incomplete reporting and confounding                                                                                                                                                    | NR                           | NR                            | Level 2+ included observational studies in the review, not just RCTs          |

|  |                                                                                                                                                                                                                                                                                                                                                                                                                                                                                                                                                                                                 |                                                                                                                                                                                                                                                                                                                                                                                                                                                                                                                                                                          |                                    |                                                                                                                                                                                                                                     |  |                                                                                                                |  |  |  |
|--|-------------------------------------------------------------------------------------------------------------------------------------------------------------------------------------------------------------------------------------------------------------------------------------------------------------------------------------------------------------------------------------------------------------------------------------------------------------------------------------------------------------------------------------------------------------------------------------------------|--------------------------------------------------------------------------------------------------------------------------------------------------------------------------------------------------------------------------------------------------------------------------------------------------------------------------------------------------------------------------------------------------------------------------------------------------------------------------------------------------------------------------------------------------------------------------|------------------------------------|-------------------------------------------------------------------------------------------------------------------------------------------------------------------------------------------------------------------------------------|--|----------------------------------------------------------------------------------------------------------------|--|--|--|
|  | <p>reported data included the baseline characteristics of the study population (age; sex; comorbidities; concomitant medications; history of surgical procedures, dental trauma, or dental infection), the characteristics of bisphosphonate treatment (specific bisphosphonate, dose, duration of treatment, mode of administration), clinical features of ONJ (signs, symptoms, site), treatment protocol used to manage ONJ, or the prevalence of ONJ in patients with OP treated with bisphosphonates; and the publication involved a case report, case series, or observational study.</p> | <p>received monotherapy with risedronate or pamidronate; 4% (1/26) received a combination of alendronate and zoledronic acid.</p> <p><u>Dose:</u> Alendronate was administered at a daily dose of 10 mg PO in 4 patients, at a weekly dose of 40 mg PO in 3 patients, and at a weekly dose of 70 mg PO in 3 patients. No cases of ONJ were observed in patients treated with a monthly or cyclic bisphosphonate regimen.</p> <p><u>Duration:</u> Provided for 10 patients: All 10 were receiving alendronate for a mean duration of 40 months (range, 12-72 months).</p> | <p>Apriori Definition:<br/>Yes</p> | <p>No cases of ONJ were identified in patients prescribed ibandronate or etidronate for the treatment of OP.</p> <p>Among patients with a reported duration of bisphosphonate treatment, no clear time dependency was observed.</p> |  | <p>variables makes it difficult to draw further conclusions about the relationship between ONJ and BP use.</p> |  |  |  |
|--|-------------------------------------------------------------------------------------------------------------------------------------------------------------------------------------------------------------------------------------------------------------------------------------------------------------------------------------------------------------------------------------------------------------------------------------------------------------------------------------------------------------------------------------------------------------------------------------------------|--------------------------------------------------------------------------------------------------------------------------------------------------------------------------------------------------------------------------------------------------------------------------------------------------------------------------------------------------------------------------------------------------------------------------------------------------------------------------------------------------------------------------------------------------------------------------|------------------------------------|-------------------------------------------------------------------------------------------------------------------------------------------------------------------------------------------------------------------------------------|--|----------------------------------------------------------------------------------------------------------------|--|--|--|

**REFERENCES**

- (1) Heaney RP. Calcium supplementation and incident kidney stone risk: A systematic review. *Journal of the American College of Nutrition* 2008; 27(5):519-527.
- (2) Pazianas M, Miller P, Blumentals WA, Bernal M, Kothawala P. A review of the literature on osteonecrosis of the jaw in patients with osteoporosis treated with oral bisphosphonates: prevalence, risk factors, and clinical characteristics. *Clinical Therapeutics* 2009; 29:1548-1558.

| <b>Evidence of Case Reports/ Case Studies on Adverse Events</b> |                                                                                                        |                                          |                                                                                                                                                                                                                                                                                                                                                                                            |                                                                                                                                                                                                                                                                                                                                                                          |                                                          |
|-----------------------------------------------------------------|--------------------------------------------------------------------------------------------------------|------------------------------------------|--------------------------------------------------------------------------------------------------------------------------------------------------------------------------------------------------------------------------------------------------------------------------------------------------------------------------------------------------------------------------------------------|--------------------------------------------------------------------------------------------------------------------------------------------------------------------------------------------------------------------------------------------------------------------------------------------------------------------------------------------------------------------------|----------------------------------------------------------|
| <b>Author (Year)<br/>Country</b>                                | <b>Number of cases<br/>Gender<br/>Age (yrs)<br/>% with Cancer<br/>% with OP</b>                        | <b>Method of Case<br/>Identification</b> | <b>Intervention/ Duration</b>                                                                                                                                                                                                                                                                                                                                                              | <b>Outcomes: Type of Harm/ Definition/<br/>Confirmation</b>                                                                                                                                                                                                                                                                                                              | <b>Level of<br/>Evidence</b>                             |
| <b>Chatziavramidis<br/>et al., 2008(1)<br/>Greece</b>           | N =2<br>Female,<br>64 and 65yrs old<br>Cancer: NR<br>OP: 100% (2/2)                                    | Presentation in clinical<br>practice     | Nasal calcitonin spray<br><br>Duration: 21 and 22 months (first<br>reported at 14 and 12 months)                                                                                                                                                                                                                                                                                           | Intranasal lesions/ nasal septum<br>perforation, synechiae between nasal<br>septum and inferior nasal concha<br>Confirmation: anterior rhinoscopy                                                                                                                                                                                                                        | Level 6<br>(Case report or<br>series of <10<br>patients) |
| <b>Engroff &amp; Coletti<br/>2008(2)<br/>USA</b>                | N = 1<br>Female,<br>74<br>Cancer: 0<br>OP:100% (1/1)                                                   | Presentation in clinical<br>practice     | PO alendronate dose not specified<br><br>Duration: 5 years                                                                                                                                                                                                                                                                                                                                 | Osteonecrosis of the palate/ exposure<br>and necrosis of the palatal torus<br>Confirmation: CT imaging                                                                                                                                                                                                                                                                   | Level 6<br>(Case report or<br>series of <10<br>patients) |
| <b>Friedrich &amp; Blake<br/>2007(3)<br/>Germany</b>            | N = 4<br>Female: N = 2, 68 and 72<br>years<br>Male: N = 2, 50 and 55 yrs<br>Cancer: 75% (3/4)<br>OP: 0 | Presentation in clinical<br>practice     | Patient 1: 55 year old man<br>prescribed pamidronate and<br>zoledronic acid<br>Patient 2: 68 year old woman<br>zoledronic acid<br>Patient 3: 72 year old woman<br>prescribed zoledronic acid,<br>Patient 4: 56 year old man<br>prescribed PO clodronate,<br>zoledronic acid 8 mg, 1x per<br>month (doses otherwise not<br>specified)<br><br>Duration: 2, 3, 3, and 4 years<br>respectively | Avascular mandibular osteonecrosis/ not<br>defined (Cases described as having<br>intraorally exposed mandible and/or<br>incomplete healing after dental<br>extraction).<br>Confirmation: Physical examination and<br>histological investigations, scintigraphy,<br>or dental surgery (revision of extraction<br>site and decortication of bone or<br>mandible resection) | Level 6<br>(Case report or<br>series of <10<br>patients) |
| <b>Grana et al.,<br/>2008(4)<br/>Spain</b>                      | N=1<br>Female,<br>64<br>Cancer: 0<br>OP:100% (1/1)                                                     | Presentation in clinical<br>practice     | Alendronate 70mg weekly<br><br>Duration: 4 years 7 months (first<br>reported at 2 years)                                                                                                                                                                                                                                                                                                   | ONJ/ exposed bone in the mandible,<br>maxilla, or palate that heals poorly or<br>persists beyond 6-8 weeks.<br>Confirmation: CT imaging                                                                                                                                                                                                                                  | Level 6<br>(Case report or<br>series of <10<br>patients) |

|                                                            |                                                                                                              |                                                                                                                                                                            |                                                                                                                                                                                                                                                |                                                                                                                                                                                                                                                                                                                                                                                                     |                                                    |
|------------------------------------------------------------|--------------------------------------------------------------------------------------------------------------|----------------------------------------------------------------------------------------------------------------------------------------------------------------------------|------------------------------------------------------------------------------------------------------------------------------------------------------------------------------------------------------------------------------------------------|-----------------------------------------------------------------------------------------------------------------------------------------------------------------------------------------------------------------------------------------------------------------------------------------------------------------------------------------------------------------------------------------------------|----------------------------------------------------|
| <b>Ing-Lorenzini et al., 2009(5)</b><br><b>Switzerland</b> | N=8<br>Female: N= 7<br>Male: N = 1<br>67.5yrs (range: 57-86)                                                 | Presentation in clinical practice                                                                                                                                          | Any bisphosphonate treatment (Alendronate, Risadronate, Pamidronate); varying doses<br><br>Duration 16 months to 8 years                                                                                                                       | Subtrochanteric fractures, involving a cortical thickening at the lateral subtrochanteric cortex with a horizontal fx line originating at the precise level and eventually extending medially.<br>Confirmation: radiographs                                                                                                                                                                         | Level 6<br>(Case report or series of <10 patients) |
| <b>Kilickap et al., 2008(6)</b><br><b>Turkey</b>           | N=1<br>Female,<br>48<br>Cancer: 100% ( 1/1)<br>OP: 0                                                         | Presentation in clinical practice                                                                                                                                          | Zoledronic acid 4 mg IV over 15 minutes<br><br>Duration: Symptoms evident within 24 hours after the first dose of zoledronic acid                                                                                                              | anterior uveitis/ not defined (Case was admitted with pain, visual loss, hyperemia, periorbital swelling and described as having corneal keratic precipitates, ciliary injection and moderate amount of cells in the anterior chamber.<br>Confirmation: Ocular examination, biomicroscopic anterior segment examination, dilated retinal examination, intraocular pressures, laboratory evaluation. | Level 6<br>(Case report or series of <10 patients) |
| <b>Kumar et al., 2008(7)</b><br><b>USA</b>                 | N = 13<br>76.9% (10) Female<br>72.3 (range: 63-80)<br>Cancer: 30.8% (4/13);<br>OP: 69.2% (9/13)              | Presentation in clinical practice (between October 2005-2007) – not clear if this was retrospective or prospective                                                         | 69.2% (9) Alendronate 70mg PO once/ week<br>23.1% (3) Zoledronic Acid 4 mg IV once/ month<br>7.7% (1) Pamidronate 90mg IV once/month<br><br>Duration: Alendronate: 12 – 120 months<br>Zoledronic Acid: 8 - 48 months<br>Pamidronate: 36 Months | ONJ/ not defined<br>Confirmation: radiographs and CT imaging (selected cases only)<br>ONJ – only mandibular involvement: 69.2% (9/13)<br>ONJ – only maxillary involvement: 23.1% (3/13)<br>ONJ – both mandibular and maxillary involvement: 7.7% (1/13)                                                                                                                                             | Level 5<br>(Case series without controls)          |
| <b>Kwek et al., 2008(8)</b><br><b>Singapore</b>            | N = 17<br>Female, Mean age: 66 yrs (range = 53-82yrs)<br>Cancer: NR<br>OP: 58.8% (10/17) (6/17 – osteopenia) | Retrospective review of all patients admitted to hospital between May 1, 2005 – January 31, 2007 with a low energy subtrochanteric femur fracture while taking alendronate | Alendronate with calcium supplementation (N = 16);<br>Risedronate for 6 yrs after 4 yrs of alendronate (N = 1)<br>Dosages not specified.<br><br>Duration: Average = 4.4 years (range = 2 -8yrs).                                               | Low energy subtrochanteric fracture (N = 17) – fracture within the region of the femur 5 cm distal to the lesser trochanter (low energy not defined, expect as related to the absence of high energy trauma).<br>Confirmation: Radiography (Roentgenograms)                                                                                                                                         | Level 5<br>(Case series without controls)          |

|                                               |                                                                                     |                                                                                                                                                                                                         |                                                                                                                                                                                                                                                                                                                                  |                                                                                                                                                                                                                                                                                                                                                                                                                                                                                                                                                 |                                                    |
|-----------------------------------------------|-------------------------------------------------------------------------------------|---------------------------------------------------------------------------------------------------------------------------------------------------------------------------------------------------------|----------------------------------------------------------------------------------------------------------------------------------------------------------------------------------------------------------------------------------------------------------------------------------------------------------------------------------|-------------------------------------------------------------------------------------------------------------------------------------------------------------------------------------------------------------------------------------------------------------------------------------------------------------------------------------------------------------------------------------------------------------------------------------------------------------------------------------------------------------------------------------------------|----------------------------------------------------|
| <b>Meek &amp; Nix<br/>2007(9)<br/>USA</b>     | N = 1<br>Male, 79<br>Cancer: 0<br>OP:100% (1)                                       | Presentation in clinical practice                                                                                                                                                                       | Alendronate – 10mg PO daily<br><br>Duration: NR                                                                                                                                                                                                                                                                                  | Hypocalcemia, subsequently developed celiac sprue/ an abnormal immune-mediated response to gluten and other related peptides.<br>Confirmation: Upper endoscopy and small bowel biopsy.                                                                                                                                                                                                                                                                                                                                                          | Level 6<br>(Case report or series of <10 patients) |
| <b>Neviasser et al.,<br/>2008(10)<br/>USA</b> | N = 70<br>84.3% (59) Female<br>Mean age: 74.7yrs<br>Cancer: NR<br>OP: 44.3% (31/70) | Retrospective review of all patients admitted to a level 1 trauma center between January 2002 and March 2007 with a low energy subtrochanteric and midshaft femur fracture; identified via ICD-9* codes | Alendronate – dosage not specified<br><br>Duration: Mean (N=16): 6.2 yrs; range = 1 - 10yrs<br><br>62.5% (10/16) showed the fracture pattern and BP duration was significantly longer than those who did not exhibit the pattern but were taking alendronate (n=6): 6.9 years versus 2.5 years of use, respectively (P = 0.002). | Low energy femoral shaft fractures – subtrochanteric and midshaft femur fractures caused by the equivalent to a fall from a standing height or less.<br>Confirmation: Radiographs<br><br>Simple, transverse or short oblique pattern in areas of thickened cortices with a unicortical beak: Fracture in those taking alendronate: 76% (19/ 25); Fracture in those not taking alendronate: 2.2% (1/45).<br><br>95% (19/20) patients identified as having the fracture pattern were taking alendronate (95%). (95% CI [19.0–939.4], P < 0.0001). | Level 5<br>(Case series without controls)          |
| <b>Rinchuse et al.<br/>2007(11)</b>           | N = 2<br>Female, 35<br>Male, 77<br>Cancer: 50% (1/2)<br>OP: 50% (1/2)               | Presentation in clinical practice                                                                                                                                                                       | Patient #1: Alendronate sodium 70mg PO once per week Patient #2: IV zoledronic acid, 500mg once per month<br><br>Duration: Patient #1: 4 yrs, 11months<br>Patient #2: for 11 months prior to orthodontic treatment and throughout orthodontic treatment (13months)                                                               | Impeded tooth movement (due to osteoclast destruction and decreased microcirculation limiting bone turnover and remodeling).<br>Confirmation: Radiographs<br><br>Osteonecrosis of the mandible at the site of a bleeding ulceration of the buccal mucosa of the lower right jaw (It was noted that Patient #2 was predisposed to ONJ because of age, metastatic cancer, prior chemotherapy, history of steroid use, and periodontal disease.)<br>Confirmation: Consultation with oral surgeon                                                   | Level 6<br>(Case report or series of <10 patients) |

|                                                  |                                                                                                                                                                                          |                                                                                                                                                                       |                                                                                                                                                                                                                                                                                                                                                                                                                                                                                                                                                                              |                                                                                                                                                                                                                                                                                                               |                                                               |
|--------------------------------------------------|------------------------------------------------------------------------------------------------------------------------------------------------------------------------------------------|-----------------------------------------------------------------------------------------------------------------------------------------------------------------------|------------------------------------------------------------------------------------------------------------------------------------------------------------------------------------------------------------------------------------------------------------------------------------------------------------------------------------------------------------------------------------------------------------------------------------------------------------------------------------------------------------------------------------------------------------------------------|---------------------------------------------------------------------------------------------------------------------------------------------------------------------------------------------------------------------------------------------------------------------------------------------------------------|---------------------------------------------------------------|
| <b>Vieillard et al.,<br/>2008(12)<br/>France</b> | <p>N = 13<br/>92.3% female<br/>Age: 62.6</p> <p>Cancer: 92.3% (12/13)<br/>OP: 1/13</p>                                                                                                   | <p>Recruited through physicians likely to see ONJ (oncologists, hematologists, rheumatologists, urologists, radiotherapists, dental oral, maxillofacial surgeons)</p> | <p>At time of diagnosis:<br/>IV BP: 92.3% (12/13)<br/>Zoledronic Acid IV: 76.9% (10/13)<br/>Pamidronate IV: 15.4% (2/13)<br/>PO alendronate (10 mg/day then 70 mg/wk): 7.7% (1/13)</p> <p>Duration: Mean = 24 mos</p> <p>Clodronate (N = 4): M = 15.75mos<br/>Pamidronate (N = 6): M = 25.8 mos<br/>Zoledronic Acid (N=10): M = 22.6 mos<br/>Alendronate N = 1: 60 months</p>                                                                                                                                                                                                | <p>ONJ/ lesion exposing the bone that developed either spontaneously or after a tooth extraction in a non-irradiated region, failure to heal despite appropriate management, bisphosphonate therapy, and absence of local metastasis or myeloma tumor.<br/>Confirmation: Orthopantomogram and CT imaging.</p> | <p>Level 5<br/>(Case series without controls)</p>             |
| <b>Wong &amp; Cheng,<br/>2008(13)<br/>China</b>  | <p>N = 2<br/>N = 2<br/>100% Female,<br/>73 &amp; 74<br/>Cancer: 50% (1/2)<br/>OP: 50% (1/2)</p>                                                                                          | <p>Presentation in clinical practice</p>                                                                                                                              | <p>Case 1: Zoledronic acid IV once per month (dose not specified)<br/>Case 2: PO alendronate (dose not specified)</p> <p>Duration: Case 1: NR; Case 2: 10 yr</p>                                                                                                                                                                                                                                                                                                                                                                                                             | <p>ONJ/ not defined but described as exposure of necrotic bone (Maxillary = 1; Mandible = 1)<br/>Confirmation: CT imaging</p>                                                                                                                                                                                 | <p>Level 6<br/>(Case report or series of &lt;10 patients)</p> |
| <b>Wutzl et al.,<br/>2008(14)<br/>Austria</b>    | <p>People receiving surgical treatment for BP related ONJ: N= 58<br/>65.5% Female<br/>Mean age: 68.3 (SD = 10.7;<br/>Range = 32 – 92.2)</p> <p>Cancer: 100% (58)<br/>OP: 8.6% (5/58)</p> | <p>Presentation in clinical practice (clinic of oral and maxillofacial surgery)</p>                                                                                   | <p>IV pamidronate (60 mg): 13.8% (8/58)<br/>zoledronic acid (4 mg; in addition to chemotherapy for cancer): 50% (29/58)<br/>Pamidronate followed by zoledronic acid: 19% (11/58)<br/>Alendronate (70 mg): 1.7% (1/58)<br/>Ibandronate and risedronate in addition to zoledronic acid: 3.4% (2/58) [dose could not be determined in 12.1% (7/58)]</p> <p>Duration: Median number of treatment cycles of pamidronate was 38 (range, 4–115) in 41.5 months (range, 4–120), while 29 treatment cycles (range, 2–64) of zoledronic acid were given in 29.6 mos (range, 2–64).</p> | <p>/ exposed necrotic bone in the maxillofacial region persisting more than 8 weeks after BP use and with no history of radiation therapy to the jaws.<br/>Confirmation: biopsy and typical pattern of bone morphology on CT.</p>                                                                             | <p>Level 5<br/>(Case series without controls)</p>             |



## REFERENCES

- (1) Chatziavramidis A, Mantsopoulos K, Gennadiou D, Sidiras T. Intranasal complications in women with osteoporosis under treatment with nasal calcitonin spray. *Auris, Nasus, Larynx* 2008; 35:417-422.
- (2) Engroff SL, Coletti D. Bisphosphonate related osteonecrosis of the palate: report of a case managed with free tissue transfer. *Oral Surgery, Oral Medicine, Oral Pathology, Oral Radiology, and Endodontology* 2008; 105:580-582.
- (3) Friedrich RE, Blake FA. Avascular mandibular osteonecrosis in association with bisphosphonate therapy: a report on four patients. *Anticancer Research* 2007; 27(1841):1846.
- (4) Grana J, Mahia IV, Meizosos MO, Vazquez T. Multiple osteonecrosis of the jaw, oral bisphosphonate therapy and refractory rheumatoid arthritis (Pathological fracture associated with ONJ and BP use for osteoporosis. *Clinical & Experimental Rheumatology* 2008; 26:384-385.
- (5) Ing-Lorenzini K, Desmeules J, Plachta O, Suva D, Dayer P, Peter R. Low energy femoral fractures associated with the long-term use of bisphosphonates. A case series from a Swiss University Hospital. *Drug Safety* 2009; 32(9):775-785.
- (6) Kilickap S, Ozdamar Y, Altundag MK, Dizdar O. A case report: zoledronic acid-induced anterior uveitis. *Medical Oncology* 2008; 25:238-240.
- (7) Kumar SKS, Meru MC, Sedghizadeh PP. Osteonecrosis of the jaws secondary to bisphosphonate therapy: a case series. *The Journal of Contemporary Dental Practice* 2008; 9(1):63-69.
- (8) Kwek EBK, Goh SK, Koh JSB, Png MA, Howe TS. An emerging pattern of subtrochanteric stress fractures: A long-term complication of alendronate therapy? *Injury* 2008; 39:224-231.
- (9) Meek SE, Nix K. Hypocalcemia after alendronate therapy in a patient with celiac disease. *Endocrine Practice* 2007; 13(4):403-407.
- (10) Neviasser AS, Lane JM, Lenart BA, Edobor-Osula F, Lorich DG. Low-energy femoral shaft fracture associated with alendronate use. *Journal of Orthopedic Trauma* 2008; 22(5):346-350.
- (11) Rinchuse DJ, Rinchuse DJ, Sozovicka MF, Robison JM, Pendleton R. Orthodontic treatment of patients using bisphosphonates: A report of 2 cases. *American Journal of Orthodontics and Dentofacial Orthopedics* 2007; 131:321-326.
- (12) Vieillard MH, Maes JM, Penel G, Facon T, Magro L, Bonnetterre J et al. Thirteen cases of jaw osteonecrosis in patients on bisphosphonate therapy. *Joint Bone Spine* 2008; 75:34-40.
- (13) Wong YK, Cheung JC. Bisphosphonate-related osteonecrosis of the jaws - Report of 2 cases and strategies on prevention and management. *Quintessence International* 2008; 39:195-201.
- (14) Wutzl A, Biedermann E, Wanschitz F, Seemann R, Klug C, Baumann A et al. Treatment results of bisphosphonate-related osteonecrosis of the jaws. *Head & Neck* 2008; 30:1224-1230.
