# Supplementary material
Source: PubMed Central journal article supplement (PMC2988535)
Supplement: 100771v2_1.pdf [file 100771v2_1.pdf]

## Lignes directrices de pratique clinique 2010 pour le diagnostic et le traitement de l'ostéoporose au Canada – Sommaire

Pour le Conseil consultatif scientifique de la Société de l'ostéoporose du Canada : Alexandra Papaioannou, MD, MSc; Suzanne Morin, MD, MSc; Angela M. Cheung, MD, PhD; Stephanie Atkinson, PhD; Jacques P. Brown, MD; Sidney Feldman, MD; David A. Hanley, MD; Anthony Hodsman, MD; Sophie A. Jamal, MD, PhD; Stephanie M. Kaiser, MD; Brent Kvern, MD; Kerry Siminoski, MD; William D. Leslie, MD, MSc

Depuis la publication des lignes directrices de 2002 d'Ostéoporose Canada, il y a eu un déplacement du paradigme sur la prévention et le traitement de l'ostéoporose et des fractures<sup>1,2</sup>. L'intérêt porte maintenant sur la prévention des fractures de fragilisation et de leurs conséquences négatives plutôt que sur le traitement d'une densité minérale osseuse faible qui n'est plus regardée que comme l'un des facteurs de risque de fracture. Compte tenu du fait que certains facteurs cliniques augmentent le risque de fracture indépendamment de la densité minérale osseuse, il est important d'utiliser une approche intégrée et de baser les décisions thérapeutiques sur le risque absolu de fracture. Les données actuelles suggèrent que de nombreux patients ayant des fractures ne bénéficient pas d'une évaluation ou d'un traitement appropriés<sup>3</sup>. Pour combler cette lacune en ce qui concerne les patients à risque élevé, les lignes directrices de 2010 se concentrent sur l'évaluation et la prise en charge des hommes et femmes de plus de 50 ans qui présentent un risque élevé de fracture de fragilisation et sur l'intégration de nouveaux outils pour l'évaluation du risque de fractures à dix ans dans la prise en charge globale.

### Fardeau de la maladie et lacunes dans les soins

Les fractures de fragilisation, conséquence de l'ostéoporose, sont responsables d'une surmortalité et d'un excès de morbidité, de douleurs chroniques, d'admissions en établissement et de coûts économiques<sup>4-6</sup>. Elles représentent 80 % de toutes les fractures chez les femmes ménopausées de plus de 50 ans<sup>3</sup>. Les femmes ayant une fracture de la hanche ou d'une vertèbre ont un risque de décès substantiellement augmenté après la fracture<sup>5</sup>. La mortalité post fracture et les taux d'institutionnalisation sont plus élevés pour les hommes que pour les femmes<sup>7</sup>.

Malgré la forte prévalence des fractures de fragilisation dans la population canadienne et bien que l'on sache que ces fractures prédisent des fractures subséquentes<sup>8</sup>, moins de 20 % des femmes<sup>3,9</sup> et 10 % des hommes<sup>10</sup> reçoivent des traitements pour prévenir ces fractures ultérieures. Ces statistiques montrent un contraste brutal avec la situation de la

#### Points clés

- Le traitement de l'ostéoporose doit être guidé par une évaluation du risque absolu pour les patients d'avoir une fracture en rapport avec l'ostéoporose.
- Les fractures de fragilisation augmentent le risque de fractures ultérieures et doivent être prises en compte dans l'évaluation.
- Les modifications des habitudes de vie et du traitement pharmacologique doivent être personnalisées pour augmenter l'adhésion au plan de traitement.

maladie cardiovasculaire pour laquelle 75 % des patients ayant eu un infarctus du myocarde reçoivent des bloqueurs afin de prévenir un autre événement<sup>11</sup>.

### Portée de ces lignes directrices

La population cible de ces lignes directrices est composée des femmes et des hommes de plus de 50 ans, en raison du fardeau global de la maladie dans ce groupe d'âge. En conséquence, nous avons concentré notre analyse documentaire systématique sur cette population. L'application de ces lignes directrices aux enfants et aux jeunes adultes, ainsi qu'à des groupes à risque élevé comme les patients transplantés, a été envisagée, mais l'analyse approfondie des conditions qui augmentent le risque dépassait largement la portée de ces lignes directrices.

Du Département de médecine, Division de gériatrie (Papaioannou), et des Départements de pédiatrie et de biochimie et sciences biomédicales, Faculté des sciences de la santé (Atkinson), Université McMaster, Hamilton (Ont.); du Département de médecine (Morin), Division de médecine générale interne, Université McGill, Montréal (Qc); du Département de médecine (Cheung), du Département d'imagerie médicale (Cheung), du Département de médecine familiale et communautaire (Feldman) et de la Faculté de médecine (Jamal), Université de Toronto, Toronto (Ont.); du Département de médecine (Brown), Université Laval, Québec (Qc); des Départements de médecine, des sciences de la santé communautaire et d'oncologie (Hanley), Université de Calgary, Calgary (Alb.); du Département de médecine (Hodsman), Université Western Ontario, London (Ont.); de la Division d'endocrinologie et métabolisme (Kaiser), Faculté de médecine, Université Dalhousie, Halifax (N.-É.); des Départements de médecine familiale (Kvern), de médecine (Leslie) et de radiologie (Leslie), Université du Manitoba, Winnipeg (Man.); et des Départements de radiologie et de médecine (Siminoski), Université de l'Alberta, Edmonton (Alb.).

## Élaboration des lignes directrices

L'élaboration de ces lignes directrices a suivi le cadre de l'instrument AGREE (*Appraisal of Guidelines, Research and Evaluation*) pour l'évaluation des lignes directrices, de la recherche et de l'évaluation<sup>12</sup>. Nous avons enquêté auprès de médecins généralistes, de patients, de spécialistes de l'ostéoporose dans différentes disciplines, de radiologistes, d'autres professionnels des professions paramédicales et de décideurs en politiques de santé pour cerner les priorités de ces lignes directrices. Nous avons ensuite effectué une analyse documentaire systématique en fonction de ces priorités pour mettre à jour nos connaissances dans deux domaines essentiels : l'évaluation du risque de fracture et les traitements de l'ostéoporose. Les thèmes supplémentaires abordés ici ont été jugés importants pour la prise en charge de l'ostéoporose.

Nous avons réuni un Comité sur les lignes directrices pour les pratiques exemplaires regroupant des participants venant de tout le Canada et ayant une expertise en méthodologie et contenu. Nous avons effectué des recherches documentaires dans sept bases de données électroniques (Annexe 1, disponible ici : [www.cmaj.ca/cgi/content/full/cmaj.100771/DC1](http://www.cmaj.ca/cgi/content/full/cmaj.100771/DC1)), nous avons adapté des stratégies de recherche à partir des analyses systématiques réalisées par le *Cochrane Musculoskeletal Group* et nous avons suivi l'organigramme PRISMA pour la sélection des études, la liste de contrôle PRESS (*Peer Reviewed Electronic Search Strategy*) et le manuel de la *Cochrane Collaboration*. Nous avons repéré 35 articles sur l'évaluation du risque fracturaire, publiés entre janvier 1990 et décembre 2009. Nous avons utilisé l'analyse systématique des traitements de l'ostéoporose de MacLean et collaborateurs<sup>13</sup> qui ont inclus 76 essais randomisés et 24 méta-analyses, complétée par les données de 30 essais randomisés contrôlés publiés depuis 2008. Nous avons résumé tous les articles,

évalué leur qualité et attribué un niveau de preuve en utilisant des critères établis (Annexe 1, disponible ici : [www.cmaj.ca/cgi/content/full/cmaj.100771/DC1](http://www.cmaj.ca/cgi/content/full/cmaj.100771/DC1))<sup>1</sup>. Nous avons ensuite développé et coté les recommandations initiales. Nous avons inclus les données pertinentes jusqu'au 19 septembre 2010.

Un groupe d'experts réunissant des membres du Conseil consultatif scientifique d'Ostéoporose Canada, des membres des organisations concernées, des médecins de famille et des experts de toutes les régions du Canada s'est réuni pour discuter des recommandations initiales. Le groupe a utilisé la méthode Delphi modifiée de RAND et de l'Université de Californie à Los Angeles pour dégager un consensus afin de s'assurer de la pertinence clinique et de l'applicabilité<sup>14</sup>. Le Comité des lignes directrices et le Comité directeur du Conseil consultatif scientifique d'Ostéoporose Canada ont alors passé en revue les recommandations. Les recommandations révisées (présentées ci-dessous avec les niveaux de preuves entre crochets) s'appuient sur le retour d'information fourni et elles ont reçu l'aval du groupe d'experts.

## Recommandations cliniques

### Chez qui devrais-je évaluer le risque d'ostéoporose et de fracture ?

Il faut évaluer les hommes et les femmes de plus de 50 ans pour dépister des facteurs de risque d'ostéoporose et de fracture afin d'identifier les personnes à risque élevé de fracture.

1. Il faut évaluer les personnes de plus de 50 ans qui ont déjà eu une fracture de fragilisation [niveau A].

### Comment dois-je évaluer le risque d'ostéoporose et de fracture ?

La collecte d'antécédents médicaux détaillés et un examen physique orienté sont recommandés pour identifier les

**Tableau 1.** Indications de mesure de la densité minérale osseuse.

| Adultes plus âgés (≥ 50 ans)                                                                  | Adultes plus jeunes (< 50 ans)                                                      |
|-----------------------------------------------------------------------------------------------|-------------------------------------------------------------------------------------|
| ≥ 65 ans (pour les hommes et femmes)                                                          | Fracture de fragilisation                                                           |
| Facteurs cliniques de risque de fracture (femmes ménopausées et hommes de 50 à 64 ans)        | Utilisation prolongée de glucocorticoïdes*                                          |
| Fractures de fragilisation après 40 ans                                                       | Utilisation d'autres médicaments à hauts risques†                                   |
| Utilisation prolongée de glucocorticoïdes*                                                    | Hypogonadisme ou ménopause prématurée (< 45 ans)                                    |
| Utilisation d'autres médicaments à hauts risques†                                             | Syndrome de malabsorption                                                           |
| Fractures de la hanche chez un parent                                                         | Hyperparathyroïdie primitive                                                        |
| Fracture vertébrale ou ostéopénie identifiée sur une radiographie                             | Autres troubles fortement associés à une perte osseuse rapide et(ou) à une fracture |
| Tabagisme actuel                                                                              |                                                                                     |
| Importante consommation d'alcool                                                              |                                                                                     |
| Faible poids corporel (< 60 kg) ou perte de poids majeure (> 10 % du poids corporel à 25 ans) |                                                                                     |
| Polyarthrite rhumatoïde                                                                       |                                                                                     |
| Autres affections fortement associées à l'ostéoporose                                         |                                                                                     |

\*Au moins trois mois de traitement cumulatif au cours de l'année précédente à une dose quotidienne équivalant à ≥ 7,5 mg de prednisone.

†Des inhibiteurs de l'aromatase ou un traitement anti-androgène, par exemple.

facteurs de risque de faible densité minérale osseuse, de chutes et de fractures, ainsi que les fractures vertébrales non diagnostiquées (Annexe 1 disponible ici : [www.cmaj.ca/cgi/content/full/cmaj.100771/DC1](http://www.cmaj.ca/cgi/content/full/cmaj.100771/DC1)). La densité minérale osseuse des personnes sélectionnées doit être mesurée par absorptiométrie biénergétique à rayons X (Tableau 1).

1. Mesurer chaque année la taille et rechercher des fractures vertébrales [niveau A].
2. Évaluer les antécédents de chute au cours de l'année écoulée. Si une chute est survenue, il faut alors effectuer une évaluation de risque multifactoriel incluant la capacité à se lever d'une chaise sans se servir des bras [niveau A].

### Quels examens dois-je prescrire en premier lieu ?

Pour la plupart des patients souffrant d'ostéoporose, définie par une densité minérale osseuse de 2,5 écarts-types ou plus en-dessous de la masse osseuse maximale de jeunes adultes (c.-à-d., un score T  $\leq -2,5$ ), seuls des examens de laboratoire limités sont habituellement nécessaires (Encadré 1). Des augmentations de la valeur des marqueurs de renouvellement de l'os doublent approximativement le risque de fracture, qui est largement indépendant de la densité minérale osseuse; toutefois, la valeur de ces marqueurs pour estimer le risque de fracture d'un individu n'est pas clairement établie<sup>15</sup>.

1. En fonction de l'évaluation clinique, effectuer des analyses biochimiques supplémentaires pour éliminer les causes secondaires d'ostéoporose chez les patients sélectionnés [niveau D].
2. Doser les taux sériques de la 25-hydroxyvitamine D chez les personnes qui recevront une pharmacothérapie contre l'ostéoporose, chez celles qui ont eu des fractures à répétition ou qui présentent une perte osseuse en dépit du traitement de l'ostéoporose et, enfin, chez celles qui ont des comorbidités perturbant l'absorption ou l'action de la vitamine D [niveau D].
3. Le taux sérique de la 25-hydroxyvitamine D doit être mesuré après trois ou quatre mois de supplémentation adéquate et le dosage ne doit pas être répété si une concentration optimale ( $\geq 75$  nmol/l) est atteinte [niveau B].
4. Le taux sérique de la 25-hydroxyvitamine D ne doit pas être dosé chez des adultes en bonne santé ayant un faible risque de déficit en vitamine D, c'est-à-dire sans ostéoporose ou pathologie perturbant l'absorption ou l'action de la vitamine D [niveau D].

La recherche de fractures vertébrales par absorptiométrie biénergétique à rayons X est une option disponible sur certains appareils de densitométrie osseuse<sup>16</sup>. Les fractures vertébrales non liées à un traumatisme sont mieux définies (sur des radiographies de profil ou par une évaluation de la fracture vertébrale) comme étant une perte de 25 % ou plus de la hauteur de la vertèbre avec altération du plateau vertébral. De telles fractures sont associées à une multiplication par cinq du risque de fracture vertébrale ultérieure comparativement aux patients ne présentant pas de fracture vertébrale<sup>17</sup>.

1. Réaliser des radiographies de profil de la colonne

### Encadré 1. Tests biochimiques recommandés chez les patients évalués pour ostéoporose.

- Calcium, corrigé pour l'albumine
- Hémogramme complet
- Créatinine
- Phosphatase alcaline
- Hormone thyroïdienne (TSH)
- Électrophorèse des protéines sériques (pour les patients ayant des fractures vertébrales)
- 25-Hydroxyvitamine D\*

\*Doit être dosée après trois ou quatre mois de supplémentation adéquate et ne doit pas être dosée de nouveau si un taux optimal (au moins 75 nmol/l) est obtenu.

vertébrale thoracique et lombaire ou effectuer une recherche de fracture vertébrale par absorptiométrie biénergétique à rayons X s'il existe des preuves cliniques suggérant l'existence d'une fracture vertébrale [niveau A].

### Comment puis-je évaluer le risque de fracture à 10 ans ?

Actuellement, deux outils étroitement associés sont disponibles au Canada pour l'estimation du risque à 10 ans de fracture ostéoporotique majeure (c'est-à-dire fracture d'une hanche, d'une vertèbre [clinique], de l'avant-bras ou de la partie proximale de l'humérus) : l'outil mis à jour de l'Association canadienne des radiologistes et d'Ostéoporose Canada (CAROC; voir [www.osteoporosis.ca](http://www.osteoporosis.ca))<sup>18</sup> et l'outil d'évaluation du risque de fracture (FRAX) de l'Organisation mondiale de la santé (OMS), spécifique pour le Canada ([www.sheffield.ac.uk/FRAX/tool.jsp?country=19](http://www.sheffield.ac.uk/FRAX/tool.jsp?country=19))<sup>19</sup>. Les deux utilisent uniquement la densité minérale osseuse (ou score T) du col fémoral. Ces outils ont été calibrés en utilisant les mêmes données canadiennes sur les fractures et ont été directement validés chez des Canadiens<sup>20-22</sup>. La version 2010 de l'outil de l'Association canadienne des radiologistes et d'Ostéoporose Canada remplace la version 2005 qui utilisait des données de fractures chez les Suédois<sup>23</sup>.

L'outil de l'Association canadienne des radiologistes et d'Ostéoporose Canada stratifie les femmes et les hommes de plus de 50 ans en trois zones de risque de fracture ostéoporotique majeure dans un délai de 10 ans (Figure 1)<sup>23</sup> : faible (< 10 %), modéré (10 %-20 %) et élevé (> 20 %). Une catégorie initiale de risque est obtenue à partir de l'âge, du sexe et du score T pour le col fémoral, dérivé de la plage de référence pour les femmes caucasiennes de l'enquête *National Health and Nutrition Examination Survey III* (enquête nationale américaine sur la santé et la nutrition)<sup>18</sup>. Certains facteurs cliniques augmentent le risque de fracture indépendamment de la densité minérale osseuse, les plus importants d'entre eux étant la présence d'une fracture de fragilisation antérieure après l'âge de 40 ans<sup>8</sup> et l'utilisation prolongée de glucocorticoïdes systémiques (c.-à-d., une utilisation cumulée pendant au moins trois mois au cours de l'année précédente d'une dose quotidienne équivalente à  $\geq 7,5$  mg de prednisonne)<sup>24</sup>. La présence de l'un ou l'autre de

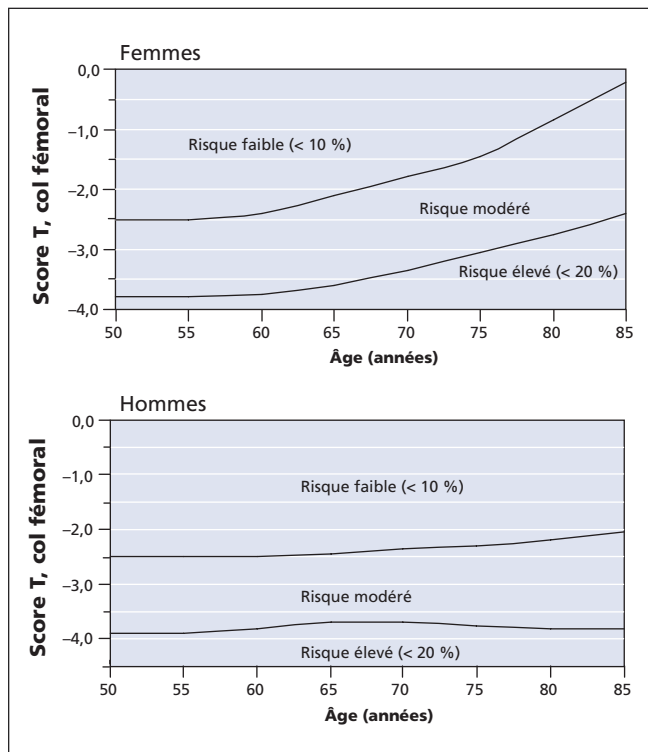

**Figure 1.** Évaluation du risque basal de fracture à 10 ans avec l'outil 2010 de l'Association canadienne des radiologues et d'Ostéoporose Canada. Le score T pour le col fémoral doit être dérivé de la base de données de référence de l'enquête *National Health and Nutrition Education Survey III* pour les femmes caucasiennes. Une fracture de fragilisation après 40 ans ou une utilisation prolongée récente de glucocorticoïdes systémiques augmente le risque basal d'une catégorie (c'est-à-dire, de faible à modéré ou de modéré à élevé). Ce modèle reflète le risque théorique pour un patient hypothétique qui n'aurait jamais été traité; il ne peut pas servir à déterminer la réduction du risque associée au traitement. Les personnes ayant une fracture de fragilisation d'une vertèbre ou de la hanche et celles qui ont eu plus d'une fracture de fragilisation présentent un risque élevé de fracture supplémentaire.

ces facteurs de risque fait passer le risque du patient dans la catégorie supérieure (c.-à-d., de faible à modéré ou de modéré à élevé). Lorsque les deux facteurs sont présents, on considère que le patient a un risque élevé de fractures indépendamment de sa densité minérale osseuse<sup>18</sup>.

L'outil d'évaluation du risque fracturaire de l'OMS utilise le sexe, l'âge, l'indice de masse corporelle, les antécédents de fracture, l'existence d'une fracture de la hanche chez un parent, une utilisation prolongée de glucocorticoïdes, une polyarthrite rhumatoïde (ou des causes secondaires d'ostéoporose), le tabagisme actuel, la consommation d'alcool (trois unités ou plus par jour) et (de façon facultative) la densité minérale osseuse du col fémoral. La discrimination des fractures au moyen de l'outil d'évaluation du risque fracturaire de l'OMS avec la densité minérale osseuse est supérieure à l'outil d'évaluation du risque fracturaire sans densité minérale osseuse ou à la densité minérale osseuse utilisée isolément<sup>25</sup>. La densité minérale osseuse de la colonne lombaire n'est prise en compte par ni

l'un ni l'autre de ces deux outils dans l'évaluation initiale du risque et le risque de fracture est légèrement sous-estimé quand le score T de la colonne vertébrale lombaire est très inférieur au score T de la hanche<sup>26</sup>.

Les taux observés de fractures chez les femmes et les hommes correspondent étroitement aux taux théoriques obtenus avec ces deux outils<sup>18</sup>. L'outil d'évaluation du risque fracturaire de l'OMS repose sur un ensemble plus complet de facteurs de risque cliniques et peut même être utilisé en l'absence de données sur la densité minérale osseuse. Cependant, les calculs nécessitent d'avoir accès au logiciel du système, au site Internet ou à des graphiques imprimés. La version 2010 de l'outil de l'Association canadienne des radiologues et d'Ostéoporose Canada est moins complète, mais plus facile à utiliser. Il existe une concordance élevée entre les deux systèmes (environ 90 %) pour la catégorisation du risque<sup>18</sup>. Les différences, lorsqu'il y en a, se rapportent habituellement à la présence d'un ou plusieurs facteurs de risque présents dans la version canadienne de l'évaluation du risque fracturaire de l'OMS mais qui ne sont pas pris en compte dans la version 2010 de l'outil de l'Association canadienne des radiologues et d'Ostéoporose Canada (antécédents familiaux de fractures de la hanche, tabagisme, consommation excessive d'alcool, polyarthrite rhumatoïde). Le choix de l'outil est essentiellement une question de préférence personnelle et de commodité.

Ni l'un ni l'autre de ces modèles ne doit être appliqué à des patients de moins de 50 ans. Chez les personnes de moins de 50 ans souffrant d'affections médicales susceptibles d'avoir des effets préjudiciables sur le squelette, l'évaluation du risque et les considérations thérapeutiques sont complexes et bénéficient souvent de l'avis d'un spécialiste. De plus, les résultats obtenus avec ces outils d'évaluation du risque traduisent le risque théorique d'un patient n'ayant jamais été traité; ils ne traduisent aucune réduction de risque associée au traitement.

La disponibilité du logiciel pour la version canadienne de l'outil d'évaluation du risque fracturaire de l'OMS n'est pas encore généralisée sur tous les appareils de mesure de la densité minérale osseuse. En conséquence, la version 2010 de l'outil de l'Association canadienne des radiologues et d'Ostéoporose Canada est le seul système qui peut être utilisé actuellement à l'échelle nationale pour rapporter des résultats de densité minérale osseuse. Cette situation est susceptible de changer lorsque le logiciel d'évaluation du risque fracturaire de l'OMS deviendra largement disponible. Les cliniciens doivent connaître l'outil d'évaluation du risque fracturaire de l'OMS, compte tenu de son importance sur le plan international comme système d'évaluation du risque à 10 ans développé et recommandé par l'OMS, et compte tenu du fait que de nombreux patients auront accès au site Internet de cet outil. Certains cliniciens pourront également préférer la polyvalence de l'outil d'évaluation du risque fracturaire de l'OMS qui permet une évaluation en l'absence de mesures de la densité minérale osseuse et qui est plus précis pour les patients présentant un ou plusieurs des facteurs de risque supplémentaires cités plus haut.

1. L'évaluation du risque absolu de fracture doit être basée

- sur des facteurs établis incluant l'âge, la densité minérale osseuse, les antécédents de fracture de fragilisation et l'utilisation de glucocorticoïdes [niveau A].
2. La version 2010 de l'outil de l'Association canadienne des radiologistes et d'Ostéoporose Canada et la version canadienne de l'outil d'évaluation du risque fracturaire de l'OMS doivent être utilisées au Canada parce qu'elles ont été validées auprès de la population canadienne [niveau A].
  3. Pour les besoins de l'établissement de rapports sur la densité minérale osseuse, la version 2010 de l'outil de l'Association canadienne des radiologistes et d'Ostéoporose Canada est actuellement le système d'évaluation du risque préféré à l'échelle nationale [niveau D].
  4. Seul le score T pour le col fémoral (dérivé de la plage de référence pour les femmes caucasiennes dans l'étude sur la santé et l'éducation nutritionnelle [*National Health and Nutrition Education Survey III*]) doit être utilisé pour calculer le risque de fracture ostéoporotique future avec l'un ou l'autre système [niveau D].
  5. Il faut considérer que les personnes ayant un score T pour la colonne lombaire ou la hanche totale  $\leq -2,5$  ont au minimum un risque modéré [niveau D].
  6. Les fractures multiples confèrent un risque supérieur à une fracture unique. De plus, l'existence d'antécédents de fractures de hanche et de vertèbre confère un plus grand risque que les autres fractures osseuses [niveau B].

### Quelles sont les options thérapeutiques ?

#### Activité physique et prévention des chutes

L'activité physique améliore la qualité de vie des personnes atteintes d'ostéoporose, en agissant en particulier sur l'état physique et les douleurs; elle améliore également la force musculaire et l'équilibre<sup>27</sup>. Il existe assez peu de données probantes montrant que l'activité physique diminue le nombre de fractures, mais une étude a montré qu'un programme de marche modérée à vigoureuse réduisait le risque de fracture de la hanche<sup>28</sup>. L'évaluation de la sécurité du domicile n'a été efficace que chez les personnes ayant des troubles visuels sévères et chez celles qui présentent un risque élevé de chutes<sup>29</sup>. L'ablation de la première cataracte des patients a réduit la fréquence des chutes<sup>29</sup>, mais les interventions pour diminuer les chutes n'ont pas réduit la fréquence des fractures<sup>30</sup>. Les protecteurs de hanche sont rentables pour la réduction du nombre de fractures de hanche chez les résidents d'établissements de soins de longue durée au Canada, mais non chez les personnes vivant dans la communauté, probablement en raison d'une mauvaise observance<sup>31</sup>.

1. Des exercices incorporant un entraînement contre résistance et adaptés à l'âge du sujet ainsi qu'à ses capacités fonctionnelles, et(ou) des exercices aérobiques avec mise en charge sont recommandés pour les personnes qui ont de l'ostéoporose ou qui sont à risque d'en avoir [niveau B].
2. Des exercices destinés à améliorer la stabilité axiale et à compenser ainsi la faiblesse musculaire ou les anomalies posturales sont recommandés pour les personnes qui ont eu des fractures vertébrales [niveau B].

3. Des exercices travaillant surtout l'équilibre, comme le tai-chi, ou l'équilibre et l'entraînement à la marche, doivent être envisagés pour les personnes présentant des risques de chute [niveau A].
4. L'utilisation de protecteurs de hanche doit être envisagée pour les adultes plus âgés qui résident dans des établissements de soins de longue durée et qui présentent un risque élevé de fracture [niveau B].

#### Calcium et vitamine D

Il existe une controverse concernant à la fois l'efficacité de la supplémentation calcique sur la diminution des fractures<sup>32,33</sup> et les effets indésirables potentiels d'une supplémentation à forte dose<sup>34</sup>. Au sein d'Ostéoporose Canada, un autre groupe (auquel ont appartenu certains auteurs de cet article) a récemment élaboré des lignes directrices concernant la vitamine D<sup>35</sup>. Nous soulignons ici les principaux changements survenus dans les recommandations sur la vitamine D par rapport aux lignes directrices de 2002 d'Ostéoporose Canada.

1. La dose quotidienne totale de calcium élément absorbée (avec l'alimentation et les suppléments) pour des personnes de plus de 50 ans doit être de 1200 mg [niveau B].
2. Chez les adultes en bonne santé présentant un faible risque de déficit en vitamine D, une supplémentation habituelle quotidienne de 400 à 1000 UI (10–25 µg) de vitamine D<sub>3</sub> est recommandée [niveau D].
3. Chez les adultes de plus de 50 ans présentant un risque modéré de déficit en vitamine D, une supplémentation quotidienne de 800 à 1000 UI (20–25 µg) de vitamine D<sub>3</sub> est recommandée. Une supplémentation quotidienne de plus de 1000 UI (25 µg) peut être nécessaire pour parvenir au niveau optimal de vitamine D. Des doses quotidiennes allant jusqu'à 2000 UI (50 µg) sont sécuritaires et ne nécessitent pas de surveillance [niveau C].
4. Pour les personnes recevant une pharmacothérapie contre l'ostéoporose, le dosage de la 25-hydroxyvitamine D doit être fait après trois ou quatre mois de supplémentation adéquate et n'a pas besoin d'être répété si un taux optimal ( $\geq 75$  nmol/L) est atteint [niveau D].

#### Traitement pharmacologique

Un nombre croissant de possibilités thérapeutiques sont disponibles au Canada : inhibiteurs de la résorption osseuse (bisphosphonates, inhibiteur du ligand RANK [activateur du récepteur du facteur nucléaire B], modulateur sélectif des récepteurs des œstrogènes, hormonothérapie, calcitonine) et médicaments stimulant l'ostéof ormation (tériparatide), avec une gamme de fréquences de doses et de voies d'administration. Des essais cliniques randomisés ont produit des preuves cohérentes indiquant que tous les traitements actuellement disponibles au Canada réduisent le risque de fracture vertébrale chez les femmes ménopausées atteintes d'ostéoporose (définie comme étant un score T  $\leq -2,5$ )<sup>13</sup>. Il a été également prouvé que certaines interventions préviennent les fractures non vertébrales et(ou) de la hanche<sup>36</sup> et peuvent réduire le taux de mortalité chez les personnes à risque élevé de fracture<sup>37,38</sup> (Annexe 1, disponible ici :

www.cmaj.ca/cgi/content/full/cmaj.100771/DC1). Les femmes ayant des antécédents de fractures de fragilisation touchant les vertèbres ou la hanche bénéficient également de l'intervention pharmacologique. D'une manière générale, la pharmacothérapie abaisse le risque de fracture vertébrale de 30 % à 70 %, selon le produit utilisé et le niveau de l'observance. L'effet sur les fractures non vertébrales est plus faible et varie selon le site de la fracture. Il y a des preuves contradictoires concernant le bénéfice de la pharmacothérapie chez les personnes ayant subi une fracture autre qu'une fracture de la hanche ou de la colonne vertébrale (une fracture du poignet, par exemple) sauf si ces personnes ont un score T d'ostéoporose. La calcitonine et le tériparatide peuvent tous deux diminuer les douleurs associées aux fractures vertébrales<sup>39,40</sup>.

Peu d'études ont évalué la réduction du taux de fractures comme critère principal d'évaluation chez les hommes<sup>13</sup>. Les revues systématiques et les méta-analyses ont trouvé une baisse des fractures vertébrales avec les bisphosphonates<sup>13,41</sup> mais aucune preuve que la testostérone diminuait le nombre de fractures<sup>13</sup>. En fait, les hommes souffrant ou non d'hypogonadisme répondent de façon identique au traitement par les bisphosphonates<sup>41</sup>.

1. Pour les femmes ménopausées qui ont besoin d'un traitement anti-ostéoporotique, l'alendronate, le risédronate, l'acide zolédronique et le dénosumab peuvent être utilisés en traitement de première intention pour la prévention des fractures de la hanche et des fractures vertébrales et non vertébrales [niveau A].
2. Pour les femmes ménopausées qui ont besoin d'un traitement anti-ostéoporotique, le raloxifène peut être utilisé comme traitement de première intention pour la prévention des fractures vertébrales [niveau A].
3. Pour les femmes ménopausées qui ont besoin d'un traitement anti-ostéoporotique en association avec le traitement de symptômes vasomoteurs, l'hormonothérapie peut être utilisée en traitement de première intention pour la prévention des fractures de la hanche et des fractures vertébrales et non vertébrales [niveau A].
4. Pour les femmes ménopausées qui ne tolèrent pas les traitements de première intention, la calcitonine ou l'édronate peuvent être envisagés pour la prévention des fractures vertébrales [niveau B].
5. Pour les hommes qui ont besoin d'un traitement anti-ostéoporotique, l'alendronate, le risédronate et l'acide zolédronique peuvent être utilisés comme traitements de première intention pour la prévention des fractures [niveau D].
6. La testostérone n'est pas recommandée pour le traitement de l'ostéoporose chez les hommes [niveau B].

### Les effets secondaires

On soulignera dans cette section les problèmes fréquents ou qui sont apparus au cours du suivi effectué depuis la mise en marché. Certains de ces problèmes restent non résolus.

Une supplémentation de calcium à forte dose peut augmenter le risque de calculs rénaux et d'événements cardio-vasculaires<sup>33,34</sup>. Les bisphosphonates peuvent provo-

quer des symptômes pseudogrippaux autolimités, en particulier après la première prise d'acide zolédronique en perfusion (effet signalé jusque dans 10 % des cas)<sup>42</sup>. Le dénosumab peut augmenter le risque de cellulite<sup>43</sup>. Le raloxifène et l'hormonothérapie augmentent le risque d'événements thromboemboliques, y compris d'embolie pulmonaire<sup>13</sup>. Le tériparatide peut provoquer une hypercalciurie et une hypercalcémie, toutes deux généralement légères et disparaissant spontanément ou à l'arrêt de la supplémentation calcique<sup>13</sup>.

La question de savoir si le traitement de l'ostéoporose par les bisphosphonates augmente le risque d'ostéonécrose de la mâchoire, de fractures atypiques du fémur, de cancer de l'œsophage ou de fibrillation auriculaire reste controversée. L'ostéonécrose de la mâchoire est définie ainsi : zone d'exposition de l'os alvéolaire dans la mandibule ou la mâchoire, ne guérissant pas après huit semaines<sup>44</sup>. Elle est extrêmement rare (< 1 cas pour 10 000 patient-années parmi les patients atteints d'ostéoporose primitive)<sup>45</sup>. Le risque est plus élevé chez les patients atteints de cancer ou qui reçoivent une radiothérapie et une chimiothérapie, chez ceux qui reçoivent des bisphosphonates à forte dose pour métastases osseuses ou des glucocorticoïdes, chez ceux qui sont atteints de diabète ou qui ont une mauvaise hygiène dentaire, et chez ceux qui subissent des procédures dentaires invasives comme des extractions dentaires ou la pose d'implants.

Les fractures atypiques du fémur sont celles qui surviennent dans la région sous-trochantérienne ou diaphysaire. Bien qu'extrêmement rares, elles peuvent être plus fréquentes parmi les patients recevant un traitement prolongé aux bisphosphonates. Cependant, aucun lien n'a été établi de façon certaine. De telles fractures tendent à avoir un aspect net, transverse ou oblique, en « bâton de craie ». Certains patients présentent des douleurs prodromiques de la cuisse ou de l'aîne. Les images radiographiques peuvent inclure un épaississement de la corticale avec la présence de becs. Les scintigraphies osseuses révèlent souvent une augmentation de la capture dans la zone concernée, suggérant une fracture de fatigue avec augmentation du remodelage. Il faut envisager la radiographie ou la scintigraphie (ou les deux) chez des patients qui ont reçu un traitement prolongé aux bisphosphonates et qui présentent de nouvelles douleurs dans la cuisse<sup>46</sup>.

Un cancer de l'œsophage est survenu chez 23 patients qui avaient reçu un traitement aux bisphosphonates entre octobre 1995 et la mi-mai 2008, ainsi que le décrit la série de cas préparée par la FDA (*Food and Drug Administration*, États-Unis). Toutefois, le nombre de patients ne recevant pas ce type de traitement et ayant eu un cancer de l'œsophage au cours de la même période n'était pas indiqué<sup>47</sup>. L'analyse d'un registre national a fourni des taux similaires pour ce type de cancer chez les patients traités et non traités par les bisphosphonates<sup>48</sup>. De grandes études récentes de cohortes rétrospectives ont signalé des résultats contradictoires<sup>49,50</sup>.

D'une manière générale, pour les patients exposés à un risque élevé de fracture à 10 ans, les avantages de la pharmacothérapie l'emportent largement sur les risques

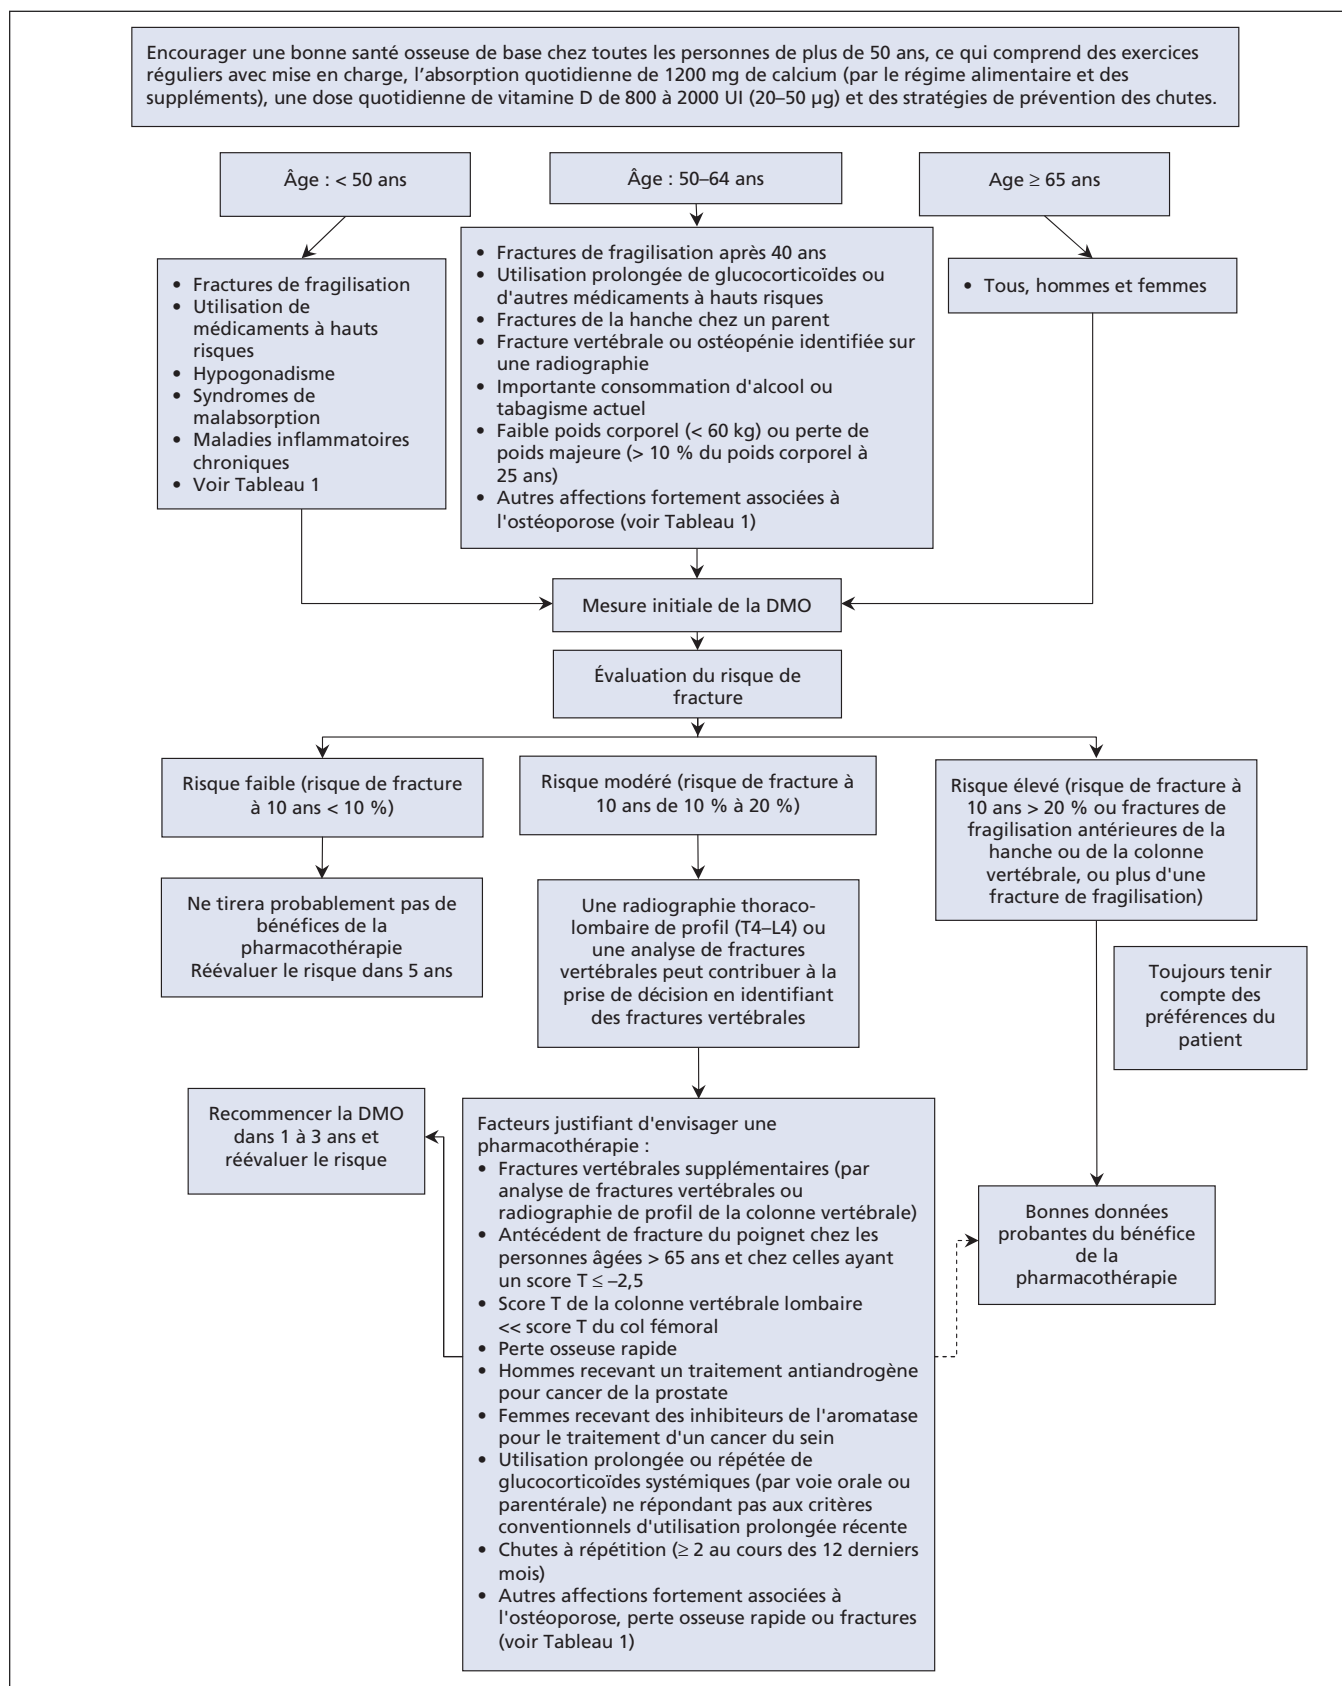

**Figure 2.** Approche intégrée de la prise en charge des patients à risque de fracture. DMO = densité minérale osseuse. La flèche aux lignes en tirets indiquent que la preuve du bénéfice de la pharmacothérapie n'est pas aussi forte dans ce cas que pour les autres recommandations.

éventuels. Ces risques doivent être mis en perspective au cours de la discussion menée avec les patients au sujet de ces problèmes.

1. Pour une prise de décision éclairée, il faut discuter des risques et des avantages potentiels des médicaments prescrits avant l'instauration du traitement [niveau D].

### Groupes particuliers

La perte osseuse associée à un traitement par les glucocorticoïdes apparaît rapidement, dans un délai de trois à six mois, et le risque de fracture augmente avec des doses aussi faibles que 2,5 à 7,5 mg/jour<sup>51</sup>. L'utilisation prolongée de glucocorticoïdes (trois mois ou davantage) a engendré une incidence de fractures de 30 % à 50 %, surtout chez les patients de plus de 40 ans qui en prennent de fortes doses<sup>13,51</sup>. Le traitement de l'ostéoporose (incluant l'alendronate, le risédronate et le téraparotide) réduit le risque de fractures vertébrales et maintient la densité minérale osseuse chez ceux qui prennent des glucocorticoïdes<sup>13,52,53</sup>. De même, l'etidronate, l'acide zolédronique et la calcitonine maintiennent la densité minérale osseuse chez les patients qui prennent des glucocorticoïdes<sup>53,54</sup>. On ignore la durée idéale du traitement de l'ostéoporose pour les patients recevant un traitement prolongé par glucocorticoïdes. Les bisphosphonates et le dénosumab maintiennent la densité minérale osseuse chez les femmes qui prennent des inhibiteurs de l'aromatase et chez les hommes soumis à un traitement antiandrogène<sup>55-58</sup>.

1. Pour les patients de plus de 50 ans qui reçoivent un traitement prolongé aux glucocorticoïdes ( $\geq$  trois mois de traitement cumulé au cours de l'année précédente à une dose quotidienne équivalente à  $\geq$  7,5 mg de prednisone), un bisphosphonate (alendronate, risédronate, acide zolédronique) doit être amorcé d'emblée et poursuivi pendant au moins toute la durée du traitement aux glucocorticoïdes [niveau A].
2. Pour les patients à risque élevé de fracture qui prennent des glucocorticoïdes ( $\geq$  trois mois de traitement cumulé au cours de l'année précédente à une dose quotidienne équivalente à  $\geq$  7,5 mg de prednisone), il faut envisager le téraparotide [niveau A].
3. Pour les utilisateurs à long terme de glucocorticoïdes qui ne tolèrent pas les traitements de première intention, on peut envisager la calcitonine ou l'etidronate pour prévenir une perte de densité minérale osseuse [niveau B].
4. Il faut évaluer le risque fracturaire des femmes qui prennent des inhibiteurs de l'aromatase et des hommes qui reçoivent un traitement antiandrogène et envisager pour ces personnes un traitement anti-ostéoporotique afin de prévenir l'apparition de fractures [niveau B].

### Comment dois-je prendre en charge les patients à risque de fracture ?

Il importe d'adopter une approche intégrée pour la prise en charge des patients à risque de fracture (Figure 2). On recommande pour tous les patients la pratique régulière d'exercices de mise en charge et d'exercices renforçant

l'équilibre et les muscles, l'arrêt du tabagisme, une optimisation de la consommation totale de calcium (par l'alimentation et des suppléments) et la prise de vitamine D. Des stratégies de prévention doivent être mises en œuvre pour les patients qui présentent des risques de chute.

Dans le cadre d'une stratégie intégrée de prise en charge, les catégories de risques de fracture (faible, modéré et élevé) servent à orienter les décisions vers des traitements particuliers. Pour les patients qui ne sont pas à risque élevé, le clinicien doit tenir compte du rapport bénéfices/risques d'effets secondaires. Lors du choix de traitement, le profil de risque individuel du patient, ses comorbidités, ses préférences et son mode de vie doivent être pris en compte.

1. L'instauration du traitement pharmacologique anti-ostéoporotique doit se fonder sur une évaluation du risque absolu de fracture à l'aide d'un outil validé de prédiction des fractures [niveau D].

### Risque élevé

1. Il faut proposer le traitement pharmacologique aux patients à risque absolu élevé (probabilité sur 10 ans  $>$  20 % de fracture ostéoporotique majeure) [niveau D].
2. Les personnes de plus de 50 ans qui ont eu une fracture de fragilisation de la hanche ou d'une vertèbre et celles qui ont eu plus d'une fracture de fragilisation courent un risque élevé de fractures subséquentes et il faut leur proposer un traitement pharmacologique [niveau B].

### Risque modéré

On doit envisager le traitement pharmacologique pour de nombreuses personnes considérées comme étant à risque modéré de fracture. Il survient davantage de fractures ostéoporotiques dans le groupe à risque modéré que dans le groupe à risque élevé (parce que le groupe à risque modéré compte davantage d'individus) même si le risque individuel de fracture est plus important chez les patients du groupe à risque élevé<sup>18</sup>. En conséquence, on doit faire une évaluation clinique soigneuse des patients à risque modéré afin d'identifier les facteurs de risque supplémentaires qui ne sont pas pris en compte dans le système d'évaluation du risque, et il faudra proposer un traitement pharmacologique à certains d'entre eux.

1. Pour les patients exposés à un risque modéré de fracture, la préférence du patient et les facteurs de risque supplémentaires (Annexe 1, disponible ici : [www.cmaj.ca/cgi/content/full/cmaj.100771/DC1](http://www.cmaj.ca/cgi/content/full/cmaj.100771/DC1)) doivent servir à orienter la pharmacothérapie [niveau C].

### Risque faible

Un traitement pharmacologique n'est habituellement pas nécessaire pour les patients à faible risque de fracture. En général, des mesures portant sur le mode de vie, comme l'activité physique, la prévention des chutes, l'optimisation de l'absorption de calcium et de vitamine D ainsi que l'arrêt du tabagisme, sont suffisantes chez les personnes à faible risque de fracture, à condition qu'elles ne soient pas exposées à des facteurs de risque de baisse rapide de la densité minérale osseuse.



## Dois-je surveiller le traitement ? Si oui, à quelle fréquence ?

Aucune étude randomisée n'a directement évalué l'intérêt de répéter une mesure de la densité minérale osseuse par rapport à l'observance du traitement ou à la diminution du risque de fracture<sup>59</sup>. Cependant, utilisée correctement, une mesure répétée peut-être un outil clinique utile<sup>23</sup>. Il faut envisager la possibilité d'une erreur de mesure lors de l'interprétation des évaluations répétées de la densité minérale osseuse afin de déterminer si les changements éventuellement observés sont réels ou résultent simplement de fluctuations aléatoires ou d'artefacts<sup>60</sup>. Chez les patients sous traitement, il faut effectuer une nouvelle mesure de la densité minérale osseuse pour la première fois après un à trois ans de traitement; l'intervalle entre les mesures pourra être allongé lorsque le traitement aura démontré son efficacité. Si la densité minérale osseuse s'est améliorée ou reste inchangée, on considérera que le patient a bien répondu au traitement. La baisse continue de la densité minérale osseuse ou la survenue d'une nouvelle fracture peut signaler une mauvaise observance du traitement, une absence de réponse au traitement ou encore l'existence de causes secondaires non reconnues de l'ostéoporose. Chez les patients exposés à un risque modéré, y compris ceux dont le score T est de  $-2,5$  ou moins, une nouvelle mesure de la densité minérale osseuse doit être effectuée après un à trois ans pour surveiller la perte osseuse rapide. Si la densité minérale osseuse est stable, on peut alors envisager de la mesurer moins souvent. Chez les personnes exposés à un faible risque de fracture et sans facteurs de risque supplémentaires de baisse rapide de la densité minérale osseuse, un intervalle de 5 à 10 ans entre les mesures peut être suffisant<sup>61</sup>.

## Quand dois-je interrompre le traitement ou utiliser un traitement combiné ?

On n'a que de peu de données probantes pour formuler des recommandations concernant la durée du traitement ou la pratique d'une interruption temporaire des médicaments (congé thérapeutique). Les taux de fractures vertébrales cliniques ont diminué de 55 % chez les patients qui ont poursuivi le traitement à l'alendronate après les cinq premières années de traitement initial (soit une durée totale de traitement de 10 ans) par rapport à ceux qui avaient arrêté après cinq ans, mais il n'y a pas eu de différences pour les taux de fractures non vertébrales ou les taux de fractures vertébrales décelées à la radiographie<sup>62</sup>. L'arrêt du risédronate ou de l'hormonothérapie (œstrogènes) peut aboutir à une baisse de la densité minérale osseuse<sup>63,64</sup>. L'association de l'hormonothérapie ou du raloxifène avec un bisphosphonate a entraîné des améliorations de la densité minérale osseuse<sup>65,66</sup>, mais il manque la preuve d'une réduction supplémentaire du taux de fractures.

1. Les personnes à risque élevé de fracture doivent poursuivre le traitement de l'ostéoporose sans congé thérapeutique [niveau D].
2. Les cliniciens doivent éviter de prescrire simultanément plus d'un inhibiteur de la résorption osseuse pour la réduction du risque de fracture [niveau D].

## Quand dois-je adresser le patient à un spécialiste ?

Les patients exposés à n'importe lequel des facteurs de risque suivants tireront profit d'une consultation auprès d'un médecin expert en matière d'ostéoporose : une fracture ou une baisse significative continue de la densité minérale osseuse en dépit d'une bonne observance d'un traitement de première intention, une intolérance au traitement de première et de deuxième intentions, toute cause d'ostéoporose secondaire dépassant la compétence du médecin de famille et une densité minérale osseuse extrêmement basse.

## Autres lignes directrices

La *National Osteoporosis Foundation* des États-Unis et la *National Osteoporosis Guideline Group* du Royaume-Uni utilisent tous deux une analyse du risque absolu de fracture à 10 ans pour orienter leurs interventions. La *National Osteoporosis Foundation* recommande le traitement des femmes ménopausées et des hommes de plus de 50 ans ayant un score  $T \leq -2,5$  au niveau de la hanche ou de la colonne vertébrale, ou encore ayant un antécédent de fracture de la hanche ou de la colonne vertébrale. De plus, les patients de faible masse osseuse (score T entre  $-1,0$  et  $-2,5$ ) doivent être traités quand le risque à 10 ans de fracture de la hanche est  $\geq 3\%$  ou que le risque à 10 ans de fracture ostéoporotique majeure est  $\geq 20\%$ <sup>67</sup>. Le *National Osteoporosis Guideline Group* recommande un seuil d'intervention selon l'âge qui va d'un risque de fracture ostéoporotique majeure de 7,5 % à 50 ans, à 30 % à 80 ans<sup>68</sup>. Ces deux approches sont différentes : les recommandations de la *National Osteoporosis Foundation* sont guidées par un rapport coût-efficacité tandis que le *National Osteoporosis Guideline Group* utilise une approche translationnelle pour déterminer les seuils thérapeutiques. Un pourcentage beaucoup plus faible de la population serait traité si on utilisait l'approche du *National Osteoporosis Guideline Group* plutôt que celle de la *National Osteoporosis Foundation*. On ne sait pas avec certitude quelle approche convient le mieux au contexte canadien.

## Transmission des connaissances

La transmission des connaissances pour ces lignes directrices a été effectuée au moyen du cadre de « transformation des connaissances en action ». Une analyse systématique a montré que les outils de prise en charge de l'ostéoporose qui ciblent le médecin et le patient et qui comportent de multiples facettes (par exemple, des rappels et des outils éducatifs et d'évaluation du risque sous forme de documents imprimés ou dans un format électronique) amélioreraient la bonne utilisation, à la fois, de la mesure de la densité minérale osseuse et du traitement<sup>69</sup>. Plusieurs études canadiennes randomisées et contrôlées ont démontré l'efficacité et la rentabilité des approches à multiples facettes dans lesquelles des responsables de cas coordonnent les soins du patient<sup>70,71</sup>. Nous avons donc développé une trousse d'outils et une stratégie de diffusion après une vaste consultation nationale auprès des médecins de famille, des patients, des

autres professionnels de la santé, des spécialistes, des radiologistes et des décideurs en politiques de santé. Un groupe de spécialistes canadiens de la transmission des connaissances et de l'ostéoporose a été réuni pour élaborer et évaluer des outils novateurs qui amélioreront la mise en œuvre de ces lignes directrices. En outre, plus de 10 organisations professionnelles ont donné leur aval à ces lignes directrices et aideront à leur diffusion (Annexe 1, disponible ici : [www.cmaj.ca/cgi/content/full/cmaj.100771/DC1](http://www.cmaj.ca/cgi/content/full/cmaj.100771/DC1)). On trouvera les outils et les ressources ici : [www.osteoporosis.ca](http://www.osteoporosis.ca).

1. Après une fracture de fragilisation, on doit cibler une initiative éducative au niveau, à la fois, du patient et du médecin de famille [niveau B].
2. La gestion de cas est recommandée comme étant une approche efficace aux soins après la fracture, pour améliorer à la fois le diagnostic et la prise en charge de l'ostéoporose [niveau A].
3. Des outils destinés aux lieux de soins ainsi que d'autres stratégies ciblées sont recommandées pour soutenir la mise en œuvre des lignes directrices sur l'ostéoporose en pratique clinique [niveau B].

## Orientations pour une recherche future

Il existe de nombreuses lacunes dans nos connaissances actuelles sur la façon de mieux prévenir les fractures et leurs conséquences néfastes. Les recherches futures devront étudier le risque de fracture dans des populations particulières (y compris des patients plus jeunes qui ont déjà eu des fractures et des patients plus jeunes prenant des glucocorticoïdes), la valeur des marqueurs de renouvellement de l'os pour évaluer le risque de fracture d'une personne et surveiller son traitement; elles devront chercher également à savoir si les programmes d'activité physique et de prévention des chutes réduisent le nombre de fractures et déterminer quelle est la dose quotidienne optimale de vitamine D permettant d'obtenir des bénéfices pour l'appareil musculo-squelettique et autres dimensions de la santé.

Cet article a fait l'objet d'un examen par les pairs.

**Intérêts concurrents :** Tous les auteurs ont reçu d'Ostéoporose Canada des honoraires de consultation et de l'aide financière pour leurs déplacements au cours de la préparation de cet article. De plus, Alexandra Papaioannou a été membre d'un conseil consultatif pour Amgen, Eli Lilly, Merck Frosst, Novartis et Procter & Gamble, a été consultante auprès d'Amgen, Aventis Pharma, Eli Lilly, Lundbeck Canada Inc., Merck Frosst, Novartis, Procter & Gamble, Servier, Warner Chilcott et Wyeth-Ayerst, a reçu des subventions de recherche sans restriction d'Amgen, Eli Lilly, Merck Frosst, Procter & Gamble et Sanofi-Aventis, a reçu des subventions pour essais cliniques de Novartis et de Pfizer, a reçu une subvention de recherche du ministère de la Santé et des soins de longue durée de l'Ontario, et été membre du Comité directeur de l'éducation médicale continue du Collège des médecins de famille de l'Ontario. Suzanne Morin a été membre d'un conseil consultatif pour Amgen, Eli Lilly, Novartis et Warner-Chilcott et a reçu des honoraires de conférencier d'Amgen, Novartis et Merck. Angela M. Cheung a été membre d'un conseil consultatif pour Amgen et Eli Lilly, a été consultante auprès de Merck, et a reçu des honoraires de conférencier d'Amgen, Eli Lilly, Merck, Novartis et Warner Chilcott. Stephanie Atkinson a été consultante auprès de Pfizer et de Wyeth Nutritionals et a participé à un essai clinique multisites financé par Novartis. Jacques P. Brown a été membre d'un conseil consultatif pour Amgen, Eli Lilly, Merck, Novartis et Warner Chilcott, a été consultant auprès d'Amgen, Eli Lilly, Merck, Novartis et Warner Chilcott, a reçu des subventions d'Abbott, Amgen, Eli Lilly, GlaxoSmithKline, Merck, Novartis, Pfizer,

Roche, Sanofi-Aventis, Servier et Warner Chilcott, et a reçu des honoraires de conférencier d'Amgen, Eli Lilly, Merck, Novartis et Warner Chilcott. David A. Hanley a été membre d'un conseil consultatif pour Amgen Canada, Eli Lilly Canada, Novartis Canada, NPS Pharmaceuticals, Servier Canada et Warner Chilcott, a participé à des essais cliniques financés par Amgen, Eli Lilly, Novartis, NPS Pharmaceuticals, Pfizer, Servier et Wyeth Ayerst, et a reçu des honoraires de conférencier d'Amgen Canada, Eli Lilly Canada, Novartis Canada, NPS Pharmaceuticals et Servier Canada. Anthony Hodsman a été membre d'un conseil consultatif pour Amgen Canada, Novartis Canada, Procter & Gamble Canada, Shire Pharmaceuticals Canada et Warner-Chilcott Canada, a été consultant auprès de Cytochroma Canada, et a reçu des honoraires de conférencier de l'Université McGill et de Novartis Canada. Stephanie M. Kaiser a été membre d'un conseil consultatif pour Amgen, AstraZeneca, Bristol Myers Squibb, Eli Lilly Canada, Merck Frosst/Schering, Novartis et Servier, a reçu des honoraires de conférencier d'Amgen, AstraZeneca, Eli Lilly, Merck Frosst/Schering Plough, Novartis, Procter & Gamble (maintenant Warner Chilcott/Aventis) et Servier Canada, a reçu une rémunération pour l'élaboration de présentations éducatives pour le compte d'Eli Lilly Canada Inc., et a reçu de l'aide financière d'Amgen Canada pour ses déplacements aux fins d'activités non reliées au présent article. Brent Kvern a été membre du conseil consultatif de l'*Alliance for Better Bone Health* (commanditée par SanofiAventis et Warner) et de celui d'Amgen Canada, a été consultant auprès de Servier Canada, a reçu des honoraires de l'*Alliance for Better Bone Health*, Amgen Canada, Eli Lilly, Merck Frosst Canada et Servier Canada, et a reçu une rémunération pour l'élaboration de présentations éducatives de l'*Alliance for Better Bone Health*, Amgen Canada, Eli Lilly, Merck Frosst Canada et Servier Canada. William D. Leslie a été membre d'un conseil consultatif pour Amgen, Genzyme et Novartis, a reçu des subventions de recherche sans restrictions d'Amgen, Genzyme, Merck Frosst, Procter & Gamble et Sanofi-Aventis, a reçu des honoraires de conférencier d'Amgen et Merck Frosst, et a reçu de Genzyme de l'aide financière pour ses déplacements aux fins d'activités non reliées au présent article. Sidney Feldman, Sophie Jamal et Kerry Siminoski ont déclaré n'avoir aucun intérêts concurrents.

**Collaborateurs :** Plus de 30 experts et intervenants dans le domaine de l'ostéoporose ont contribué à la rédaction des Lignes directrices pour le diagnostic et le traitement de l'ostéoporose au Canada. La D<sup>re</sup> Papaioannou, présidente du Groupe de travail sur les thérapies, et le D<sup>r</sup> Leslie, président du Groupe de travail sur l'évaluation des risques, ont dirigé le projet dans son ensemble. Les membres des deux groupes de travail (Groupe de travail sur les thérapies : Alexandra Papaioannou, Suzanne Morin, Angela M. Cheung, Stephanie Atkinson, Sophie A. Jamal, Stephanie M. Kaiser et Brent Kvern; Groupe de travail sur l'évaluation du risque : William D. Leslie, Angela M. Cheung, Jacques P. Brown, Sidney Feldman, David A. Hanley, Anthony Hodsman et Kerry Siminoski) ont participé à la conception et à l'élaboration des lignes directrices, y compris à l'analyse et à l'interprétation des données et à la rédaction et révision des diverses sections de la version intégrale des lignes directrices. Un comité de rédaction restreint (Alexandra Papaioannou, Suzanne Morin, Angela M. Cheung et William D. Leslie) s'est chargé de préparer le présent sommaire des lignes directrices, qui a été revu et approuvé par tous les membres des deux groupes de travail.

**Remerciements :** Les auteurs remercient les membres de leur équipe de soutien pour leur dévouement envers le projet des lignes directrices et reconnaît leur contribution : Elke Henneberg, coordonnatrice du projet sur les pratiques exemplaires chez ebmed Inc. ([www.ebmed.ca](http://www.ebmed.ca)); les chercheuses Loretta Hillier, MA, Christina Lacchetti, MHSc, Tamara Rader, MLIS, et Hajera Khaja, MSc; et Marg MacDonell, représentante des consommateurs. Nous remercions aussi le soutien de Famida Jiwa, DC, MHSc, Farah Samji, DC, MHSc, et Donna Spafford, RN, BA, d'Ostéoporose Canada. Nous remercions les membres du groupe d'experts pour leurs contributions aux lignes directrices : Brian Lentle, MD (animateur), Jacques Levesque, MD, Sumit R. Majumdar, MD, Heather Frame, MD, Lynn Nash, MD, Michel Fortier, MD, Earl Bogoch, MD, David Goltzman, MD, Robert Josse, MBBS, Colleen Metge BSc(Pharm), PhD, Louis-Georges Ste-Marie, MD, Diane Theriault, MD, et Anne Marie Whelan, PharmD. Nous tenons aussi à exprimer notre gratitude à Gillian Hawker, MD, Jonathan D. Adachi, MD, Heather McDonald-Blumer, MD, et Irene Polidoulis, MD, qui ont revu les documents se rapportant au manuscrit.

**Financement :** Alexandra Papaioannou reçoit l'appui d'une Chaire en santé des femmes des Instituts de recherche en santé du Canada (IRSC) et Eli Lilly, Angela M. Cheung, d'une bourse de chercheur principal des IRSC et de l'Institut de la santé des femmes et des hommes, et Sophie A. Jamal, d'une bourse de nouveau chercheur des IRSC. Ostéoporose Canada a fourni du soutien financier pour les

réunions en personne et pour le coordonnateur de projet et les adjoints de recherche qui ont travaillé sous la direction des coprésidents du projet des lignes directrices.

## BIBLIOGRAPHIE

- Brown JP, Josse RG; Conseil consultatif scientifique de la Société de l'ostéoporose du Canada. Lignes directrices de pratique clinique 2002 pour le diagnostic et le traitement de l'ostéoporose au Canada. *CMAJ* 2002;167(10 Suppl):S1-34.
- Cheung AM, Detsky AS. Osteoporosis and fractures: Missing the bridge? *JAMA* 2008;299:1468-70.
- Bessette L, Ste-Marie LG, Jean S, et al. The care gap in diagnosis and treatment of women with a fragility fracture. *Osteoporos Int* 2008;19:79-86.
- Papaioannou A, Kennedy CC, Ioannidis G, et al. The impact of incident fractures on health-related quality of life: 5 years of data from the Canadian Multicentre Osteoporosis Study. *Osteoporos Int* 2009;20:703-14.
- Ioannidis G, Papaioannou A, Hopman WM, et al. Relation between fractures and mortality: results from the Canadian Multicentre Osteoporosis Study. *CMAJ* 2009;181:265-71.
- Wiktorowicz ME, Goeree R, Papaioannou A, et al. Economic implications of hip fracture: health service use, institutional care and cost in Canada. *Osteoporos Int* 2001;12:271-8.
- Tosteson AN, Gottlieb DJ, Radley DC, et al. Excess mortality following hip fracture: the role of underlying health status. *Osteoporos Int* 2007;18:1463-72.
- Kanis JA, Johnell O, De Laet C, et al. A meta-analysis of previous fracture and subsequent fracture risk. *Bone* 2004;35:375-82.
- Papaioannou A, Giangregorio L, Kvern B, et al. The osteoporosis care gap in Canada. *BMC Musculoskelet Disord* 2004;5:11.
- Papaioannou A, Kennedy CC, Ioannidis G, et al. The osteoporosis care gap in men with fragility fractures: the Canadian Multicentre Osteoporosis Study. *Osteoporos Int* 2008;19:581-7.
- Austin PC, Tu JV, Ko DT, et al. Factors associated with the use of evidence-based therapies after discharge among elderly patients with myocardial infarction. *CMAJ* 2008;179:901-8.
- AGREE Collaboration. Development and validation of an international appraisal instrument for assessing the quality of clinical practice guidelines: the AGREE project. *Qual Saf Health Care* 2003;12:18-23.
- MacLean C, Newberry S, Maglione M, et al. Systematic review: comparative effectiveness of treatments to prevent fractures in men and women with low bone density or osteoporosis. *Ann Intern Med* 2008;148:197-213.
- Fitch K, Bernstein SJ, Aguilar MS, et al. *The RAND/UCLA appropriateness method user's manual*. Santa Monica (CA) : The RAND Corporation; 2001.
- Brown JP, Albert C, Nassar BA, et al. Bone turnover markers in the management of postmenopausal osteoporosis. *Clin Biochem* 2009;42:929-42.
- Lentle BC, Brown JP, Khan A, et al. Recognizing and reporting vertebral fractures: reducing the risk of future osteoporotic fractures. *Can Assoc Radiol J* 2007;58:27-36.
- Lindsay R, Silverman SL, Cooper C, et al. Risk of new vertebral fracture in the year following a fracture. *JAMA* 2001;285:320-3.
- Leslie WD, Berger C, Langsetmo L, et al. Construction and validation of a simplified fracture risk assessment tool for Canadian women and men: results from the CaMos and Manitoba BMD cohorts. *Osteoporos Int*. Sous presse.
- Leslie WD, Lix LM, Langsetmo L, et al. Construction of a FRAX® model for the assessment of fracture probability in Canada and implications for treatment. *Osteoporos Int*. Sous presse.
- Leslie WD, Lix LM, Johansson H, et al.; Manitoba Bone Density Program. Independent clinical validation of a Canadian FRAX(RR) tool: fracture prediction and model calibration. *J Bone Miner Res*. Le 30 avril 2010. [Publication en ligne avant la version imprimée.]
- Leslie WD, Tsang JF, Lix LM; Manitoba Bone Density Program. Simplified system for absolute fracture risk assessment: clinical validation in Canadian women. *J Bone Miner Res* 2009;24:353-60.
- Fraser L, Langsetmo L, Berger C, et al. Fracture prediction and calibration of a Canadian FRAX tool: a population-based report from CaMos. *Osteoporos Int*. Sous presse.
- Siminoski K, Leslie WD, Frame H, et al. Recommendations for bone mineral density reporting in Canada. *Can Assoc Radiol J* 2005;56:178-88.
- Kanis JA, Johansson H, Oden A, et al. A meta-analysis of prior corticosteroid use and fracture risk. *J Bone Miner Res* 2004;19:893-9.
- Kanis JA, Oden A, Johnell O, et al. The use of clinical risk factors enhances the performance of BMD in the prediction of hip and osteoporotic fractures in men and women. *Osteoporos Int* 2007;18:1033-46.
- Leslie WD, Lix LM, Johansson H, et al. Spine-hip discordance and fracture risk assessment: a physician-friendly FRAX enhancement. *Osteoporos Int* 2010. Sous presse.
- Li WC, Chen YC, Yang RS, et al. Effects of exercise programmes on quality of life in osteoporotic and osteopenic postmenopausal women: a systematic review and meta-analysis. *Clin Rehabil* 2009;23:888-96.
- Moayyeri A. The association between physical activity and osteoporotic fractures: a review of the evidence and implications for future research. *Ann Epidemiol* 2008;18:827-35.
- Gillespie LD, Robertson MC, Gillespie WJ, et al. Interventions for preventing falls in older people living in the community. *Cochrane Database Syst Rev* 2009;(2):CD007146.
- de Kam D, Smulders E, Weerdesteyn V, et al. Exercise interventions to reduce fall-related fractures and their risk factors in individuals with low bone density: a systematic review of randomized controlled trials. *Osteoporos Int* 2009;20:2111-25.
- Hip protectors in long-term care policy guidance and implementation. Ottawa (Ont.) : Agence canadienne des médicaments et des technologies de la santé, Service d'information sur les technologies de la santé; 2010
- Tang BM, Eslick GD, Nowson C, et al. Use of calcium or calcium in combination with vitamin D supplementation to prevent fractures and bone loss in people aged 50 years and older: a meta-analysis. *Lancet* 2007;370:657-66.
- Reid IR, Bolland MJ, Grey A. Effect of calcium supplementation on hip fractures. *Osteoporos Int* 2008;19:1119-23.
- Bolland MJ, Avenell A, Baron JA, et al. Effect of calcium supplements on risk of myocardial infarction and cardiovascular events: meta-analysis. *BMJ* 2010;341:c3691.
- Hanley DA, Cranney A, Jones G, et al.; Comité des lignes directrices du Conseil consultatif scientifique d'Ostéoporose Canada. Vitamin D in adult health and disease: a review and guideline statement from Osteoporosis Canada (sommaire). *CMAJ* 2010;182:1315-9.
- Cranney A, Guyatt G, Griffith L, et al.; Osteoporosis Methodology Group and The Osteoporosis Research Advisory Group. Meta-analyses of therapies for postmenopausal osteoporosis. IX: Summary of meta-analyses of therapies for postmenopausal osteoporosis. *Endocr Rev* 2002;23:570-8.
- Bolland MJ, Grey AB, Gamble GD, et al. Effect of osteoporosis treatment on mortality: a meta-analysis. *J Clin Endocrinol Metab* 2010;95:1174-81.
- Lyles KW, Colon-Emeric CS, Magaziner JS, et al. Zoledronic acid and clinical fractures and mortality after hip fracture. *N Engl J Med* 2007;357:1799-809.
- Knopp JA, Diner BM, Blitz M, et al. Calcitonin for treating acute pain of osteoporotic vertebral compression fractures: a systematic review of randomized, controlled trials. *Osteoporos Int* 2005;16:1281-90.
- Langdahl BL, Rajzbaum G, Jakob F, et al. Reduction in fracture rate and back pain and increased quality of life in postmenopausal women treated with teriparatide: 18-month data from the European Forsteo Observational Study (EFOS). *Calcif Tissue Int* 2009;85:484-93.
- Sawka AM, Papaioannou A, Adachi JD, et al. Does alendronate reduce the risk of fracture in men? A meta-analysis incorporating prior knowledge of anti-fracture efficacy in women. *BMC Musculoskelet Disord* 2005;6:39.
- Rahmani P, Morin S. Prevention of osteoporosis-related fractures among postmenopausal women and older men. *CMAJ* 2009;181:815-20.
- Cummings SR, San Martin J, McClung MR, et al. Denosumab for prevention of fractures in postmenopausal women with osteoporosis. *N Engl J Med* 2009;361:756-65.
- Khosla S, Burr D, Cauley J, et al. Bisphosphonate-associated osteonecrosis of the jaw: report of a task force of the American Society for Bone and Mineral Research. *J Bone Miner Res* 2007;22:1479-91.
- Grbic JT, Landesberg R, Lin SQ, et al. Incidence of osteonecrosis of the jaw in women with postmenopausal osteoporosis in the health outcomes and reduced incidence with zoledronic acid once yearly pivotal fracture trial. *J Am Dent Assoc* 2008;139:32-40.
- Shane E, Burr D, Ebeling PR, et al. Atypical subtrochanteric and diaphyseal femoral fractures: report of a task force of the American Society for Bone and Mineral Research. *J Bone Miner Res* 2010 Sep 14. [Publication en ligne avant la version imprimée.]
- Wysowski DK. Reports of esophageal cancer with oral bisphosphonate use. *N Engl J Med* 2009;360:89-90.
- Abrahamsen B, Eiken P, Eastell R. More on reports of esophageal cancer with oral bisphosphonate use. *N Engl J Med* 2009;360:1789; réponse de l'auteur 1791-2.
- Green J, Czanner G, Reeves G, et al. Oral bisphosphonates and risk of cancer of oesophagus, stomach, and colorectum: case-control analysis within a UK primary care cohort. *BMJ* 2010;341:c4444.
- Cardwell CR, Abnet CC, Cantwell MM, et al. Exposure to oral bisphosphonates and risk of esophageal cancer. *JAMA* 2010;304:657-63.
- Van Staa TP, Laan RF, Barton IP, et al. Bone density threshold and other predictors of vertebral fracture in patients receiving oral glucocorticoid therapy. *Arthritis Rheum* 2003;48:3224-9.
- Qaseem A, Snow V, Shekelle P, et al. Pharmacologic treatment of low bone density or osteoporosis to prevent fractures: a clinical practice guideline from the American College of Physicians. *Ann Intern Med* 2008;149:404-15.
- Reid DM, Devogelaar JP, Saag K, et al. Zoledronic acid and risedronate in the prevention and treatment of glucocorticoid-induced osteoporosis (HORIZON): a multicentre, double-blind, double-dummy, randomised controlled trial. *Lancet* 2009;373:1253-63.
- Cranney A, Welch V, Adachi JD, et al. Calcitonin for the treatment and prevention of corticosteroid-induced osteoporosis. *Cochrane Database Syst Rev* 2000;(2) : CD001983.
- Tsoi D, Khan A, Nowak AK, et al. Bisphosphonates for prevention of bone loss in women with early breast cancer. *Cochrane Database Syst Rev* 2009;(3) : CD007914.
- Hines SL, Sloan JA, Atherton PJ, et al. Zoledronic acid for treatment of osteopenia and osteoporosis in women with primary breast cancer undergoing adjuvant aromatase inhibitor therapy. *Breast* 2010;19:92-6.
- Ellis GK, Bone HG, Chlebowski R, et al. Randomized trial of denosumab in patients receiving adjuvant aromatase inhibitors for nonmetastatic breast cancer. *J Clin Oncol* 2008;26:4875-82.
- Smith MR, Egerdie B, Hernandez Toriz N, et al. Denosumab in men receiving androgen-deprivation therapy for prostate cancer. *N Engl J Med* 2009;361:745-55.
- Lewiecki EM, Watts NB. Assessing response to osteoporosis therapy. *Osteoporos*

- Int* 2008;19:1363-8.
60. Baim S, Wilson CR, Lewiecki EM, et al. Precision assessment and radiation safety for dual-energy x-ray absorptiometry: position paper of the International Society for Clinical Densitometry. *J Clin Densitom* 2005;8:371-8.
  61. Frost SA, Nguyen ND, Center JR, et al. Timing of repeat BMD measurements: development of an absolute risk-based prognostic model. *J Bone Miner Res* 2009;24:1800-7.
  62. Black DM, Schwartz AV, Ensrud KE, et al. Effects of continuing or stopping alendronate after 5 years of treatment: the Fracture Intervention Trial Long-term Extension (FLEX): a randomized trial. *JAMA* 2006;296:2927-38.
  63. Watts NB, Chines A, Olszynski WP, et al. Fracture risk remains reduced one year after discontinuation of risedronate. *Osteoporos Int* 2008;19:365-72.
  64. Schneider DL, Barrett-Connor EL, Morton DJ. Timing of postmenopausal estrogen for optimal bone mineral density. The Rancho Bernardo Study. *JAMA* 1997;277:543-7.
  65. Greenspan SL, Resnick NM, Parker RA. Combination therapy with hormone replacement and alendronate for prevention of bone loss in elderly women: a randomized controlled trial. *JAMA* 2003;289:2525-33.
  66. Johnell O, Scheele WH, Lu Y, et al. Additive effects of raloxifene and alendronate on bone density and biochemical markers of bone remodeling in postmenopausal women with osteoporosis. *J Clin Endocrinol Metab* 2002;87:985-92.
  67. Tosteson AN, Melton LJ III, Dawson-Hughes B, et al. Cost-effective osteoporosis treatment thresholds: the United States perspective. *Osteoporos Int* 2008;19:437-47.
  68. Kanis JA, McCloskey EV, Johansson H, et al. Case finding for the management of osteoporosis with FRAX — assessment and intervention thresholds for the UK. *Osteoporos Int* 2008;19:1395-408.
  69. Kastner M, Straus SE. Clinical decision support tools for osteoporosis disease management: a systematic review of randomized controlled trials. *J Gen Intern Med* 2008;23:2095-105.
  70. Majumdar SR, Beaupre LA, Harley CH, et al. Use of a case manager to improve osteoporosis treatment after hip fracture: results of a randomized controlled trial. *Arch Intern Med* 2007;167:2110-5.
  71. Bogoch ER, Elliot-Gibson V, Beaton DE, et al. Effective initiation of osteoporosis diagnosis and treatment for patients with a fragility fracture in an orthopaedic environment. *J Bone Joint Surg Am* 2006;88:25-34.

---

**Correspondance :** *D<sup>re</sup> Alexandra Papaioannou, McMaster University, Hamilton Health Sciences — St. Peter's Hospital, 88 Maplewood Ave., Hamilton ON L8M 1W9; papaioannou@hhsc.ca*
